# Supplementary material
Source: Research Square preprint supplement (doi:10.21203/rs.3.rs-10184471/v1)
Supplement: Supplementary file 1 [file 95d3ec7ed85cffa66fbef1f5.docx]

**Interface-regulated photophysics in protein phosphorescent nanofilms for imperceptible unclonable security**

Jing Wang1#, Wan-Lin Chen2#, Zi-Ting Wang1, Tao Wang1, Shu-Jie Wang1, Yu Wang1,3*, Zhao-Zhu Zheng2*, Zhengzhong Shao4*, Yan-Qing Lu1*

1National Laboratory of Solid State Microstructures, Key Laboratory of Intelligent Optical Sensing and Manipulation, College of Engineering and Applied Sciences, and Collaborative Innovation Center of Advanced Microstructures, Nanjing University, Nanjing 210023, P. R. China

2National Engineering Laboratory for Modern Silk, Soochow University, Suzhou 215123, P. R. China

3Jiangsu Key Laboratory for Cardiovascular Information and Health Engineering Medicine, Nanjing University, Nanjing 210093, P. R. China

4State Key Laboratory of Molecular Engineering of Polymers, Laboratory of Advanced Materials, and Department of Macromolecular Science, Fudan University, Shanghai 200433, P. R. China

*E-mail: yuwang87@nju.edu.cn, zzzheng@suda.edu.cn, zzshao@fudan.edu.cn, yqlu@nju.edu.cn

**Supplementary Texts**

**Water vapor transmission rate (WVTR)**

The gravimetric method was employed to investigate the WVTR of the PPNF. The PPNF was sealed onto a test cup with an inner diameter of 20 mm and a depth of 40 mm, which was filled with a certain amount of anhydrous calcium chloride. The cup was then placed in a desiccator maintained at a temperature of 23 ± 2 °C and a relative humidity of 75 ± 5 %RH. The weight change of the cup was recorded at intervals of several hours. The WVTR was calculated using the following formula:

(1)

where *∆m* (g) is the weight change of the test cup before and after the test, *t* (h) is the test duration, and *A* (m²) is the test area. Measurements were repeated three times, and the average value was recorded.

**Oxygen transmission rate (OTR)**

The oxygen permeability of PPNF was measured by the deoxidizer absorption method. The PPNF was sealed onto a test cup with an inner diameter of 20 mm and a depth of 40 mm, which was filled with a certain amount of oxygen scavenger (reduced iron powder). The cup was then placed in a desiccator maintained at a temperature of 23 ± 2 °C and a relative humidity of 75 ± 5 %RH for 48 hours. The OTR value was determined using the following formula:

(2)

where *∆m* (g) is the weight change of the test cup before and after the test, *t* (h) is the test duration, and *A* (m²) is the test area. Measurements were repeated three times, and the average value was recorded.

**Antibacterial experiment**

The antibacterial activity of the samples was evaluated using a standard colony counting assay1. *Escherichia coli* (*E. coli*, ATCC 25922) *Staphylococcus aureus* (*S. aureus*, ATCC 6538) were aerobically cultured in 20 mL of Mueller Hinton broth (MHB) at 37 °C and 70 rpm overnight to obtain logarithmic phase bacterial suspensions. Subsequently, 1 mL of each bacterial suspension was collected in a sterile centrifuge tube, centrifuged at 5000 rpm, washed three times with sterile phosphate-buffered saline (PBS), and resuspended in PBS to a final concentration of 105 CFU mL-1. For the antibacterial assay, 10 μL of the bacterial suspension was added to 1 mL of each sample solution (lysozyme solution, a mixture of lysozyme and TCEP solution, and a mixture of lysozyme, TCEP and SF solution), followed by incubation at 37 °C for 8 h in a humidified chamber (DNP-9162, Jinghong, Shanghai, China). After incubation, the bacterial suspensions were serially diluted with sterile PBS and spread onto Mueller Hinton agar (MHA) plates. The plates were incubated at 37 °C for 24 h, and the number of viable bacterial colonies was recorded. The antibacterial efficiency was calculated according to the following equation:

Inhibition ratio (%) =00 (3)

where C0 represents the colony number in the control group, and C represents the colony number in the experimental group. All experiments were performed in five independent replicates, and the results are presented as the mean value.

**Weight loss of the banana during storage**

The weight loss of the banana was determined by calculating the difference between the initial weight and the weight measured daily, with a precision of 0.0001 g. The weight loss rate was calculated using equation:

(4)

where *m0* (g) is the initial mass of fruits, *mn* (g) is the mass of fruits after n days.

***In vitro* cell cytotoxicity assay**

Three PPNFs (PPNF-Phe9, PPNF-mBP, and PPNF-F3BA) were prepared in 24-well cell culture plates and sterilized by ultraviolet irradiation for 2 h in a laminar flow cabinet (SW-CJ-2F, AIRTECH, China). Tissue culture plates (TCPs) were used as controls. L929 fibroblasts (Shanghai Institute of Biochemistry and Cell Biology, Chinese Academy of Sciences, China) in the logarithmic growth phase were detached, resuspended, and seeded onto the films at a density of 6,250 cells per well. At predetermined time points (days 1, 3, and 5), the culture medium was removed, and the cells were incubated with 250 μL of serum-free medium containing 10% (v/v) AlamarBlue (Aladdin, China) reagent for 2.5 h. Subsequently, 100 μL of the reaction solution was transferred to a black 96-well plate (Corning, USA), and fluorescence intensity was measured using a microplate reader (λex530/λem590 nm, Synergy H2 Microplate Reader, BioTek, USA). After measurement, the reaction solution was discarded, washed with PBS twice, and 2 mL of fresh culture medium was added to each well for continued culture. For cell morphology observation, cells cultured on the films for 5 days were stained with 4 μM calcein-AM (Aladdin, China) for 30 min, washed with PBS twice, and fluorescence imaging using an inverted fluorescence microscope (Axio Vert.A1, Carl Zeiss, Germany).

**Supplementary Figures**


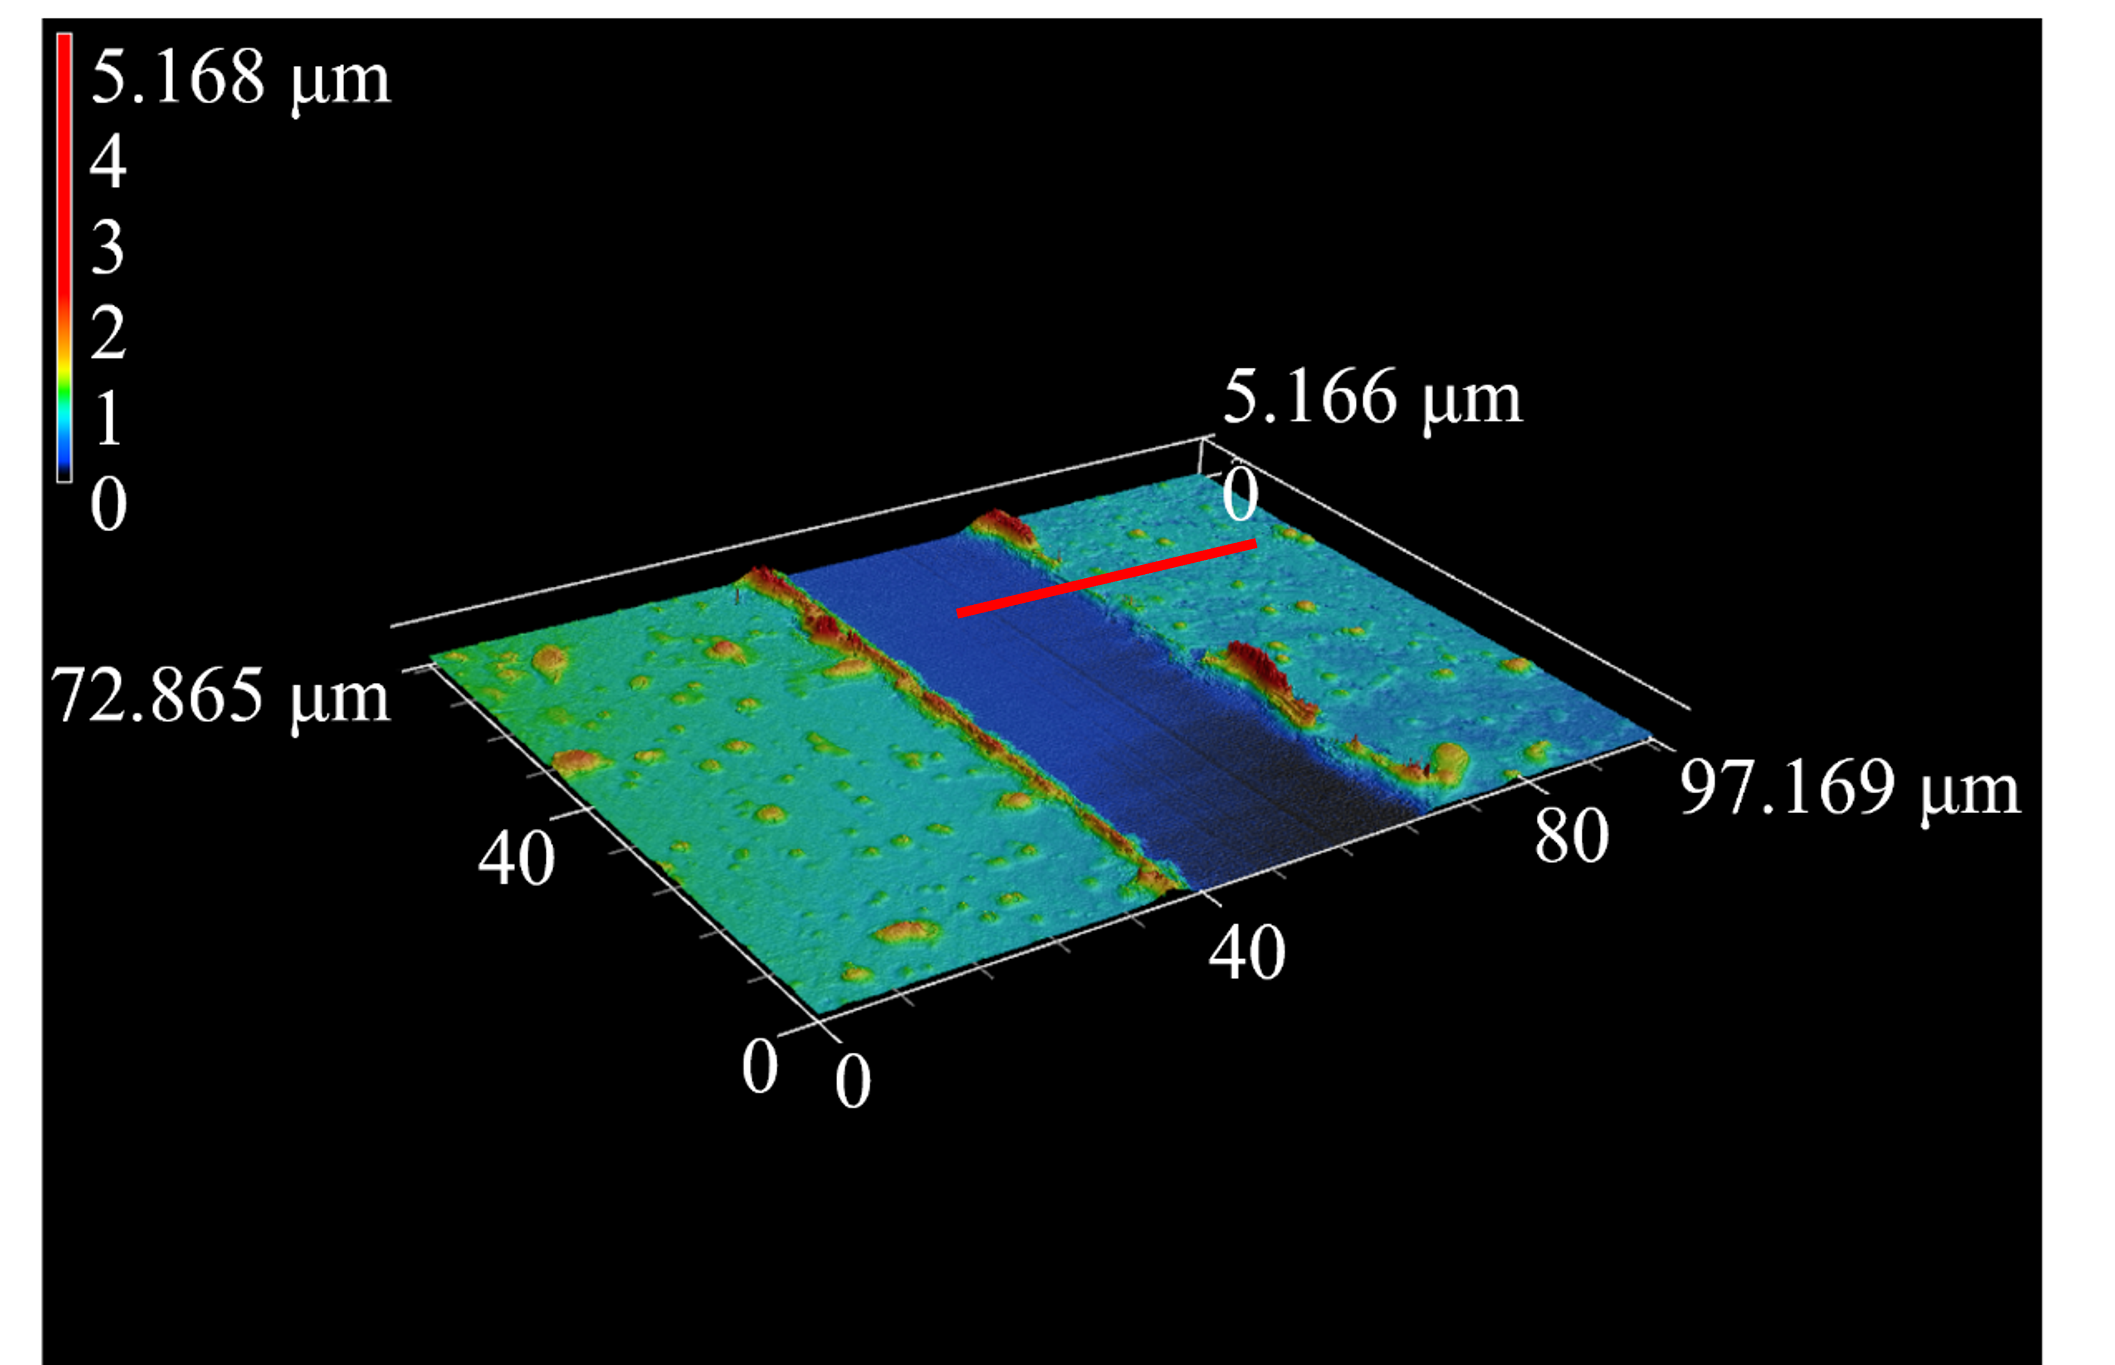


**Supplementary Fig. 1 |** 3D laser-scanning confocal microscope image of the PPNF. The corresponding height information is provided in Fig. 2c.

**
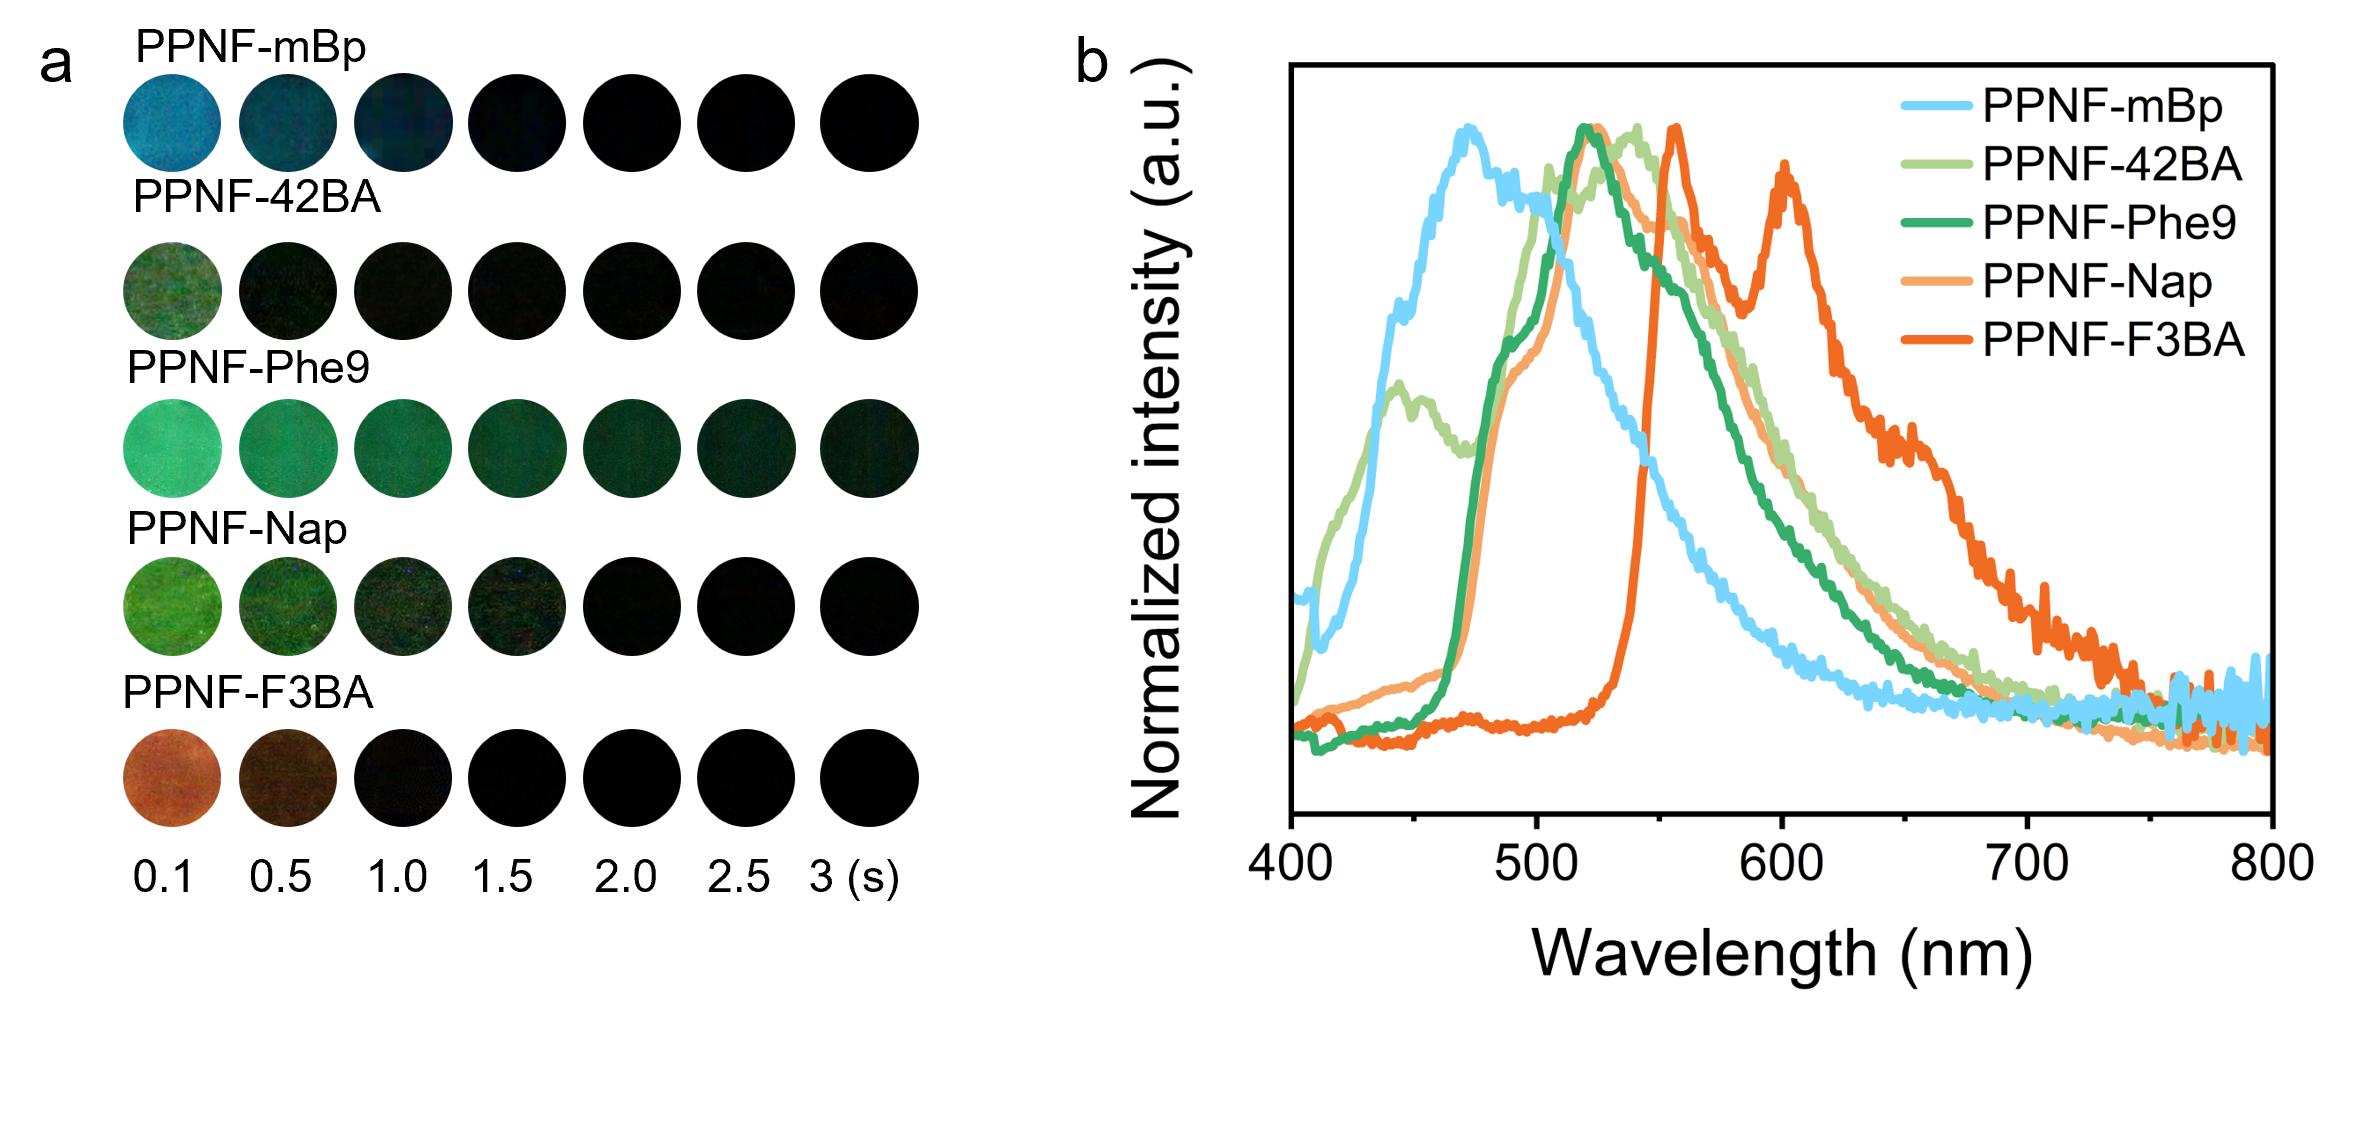
**

**Supplementary Fig. 2 | PPNFs with different afterglow colors.** **a,** Photographs of PPNF-mBp (*λ*ex = 254 nm), PPNF-42BA (*λ*ex = 254 nm), PPNF-phe9 (*λ*ex = 254 nm), PNF-Nap (*λ*ex = 312 nm) and, PPNF-F3BA (*λ*ex = 365 nm) films taken upon turning off the UV lamp. **b,** Corresponding normalized phosphorescence spectra.


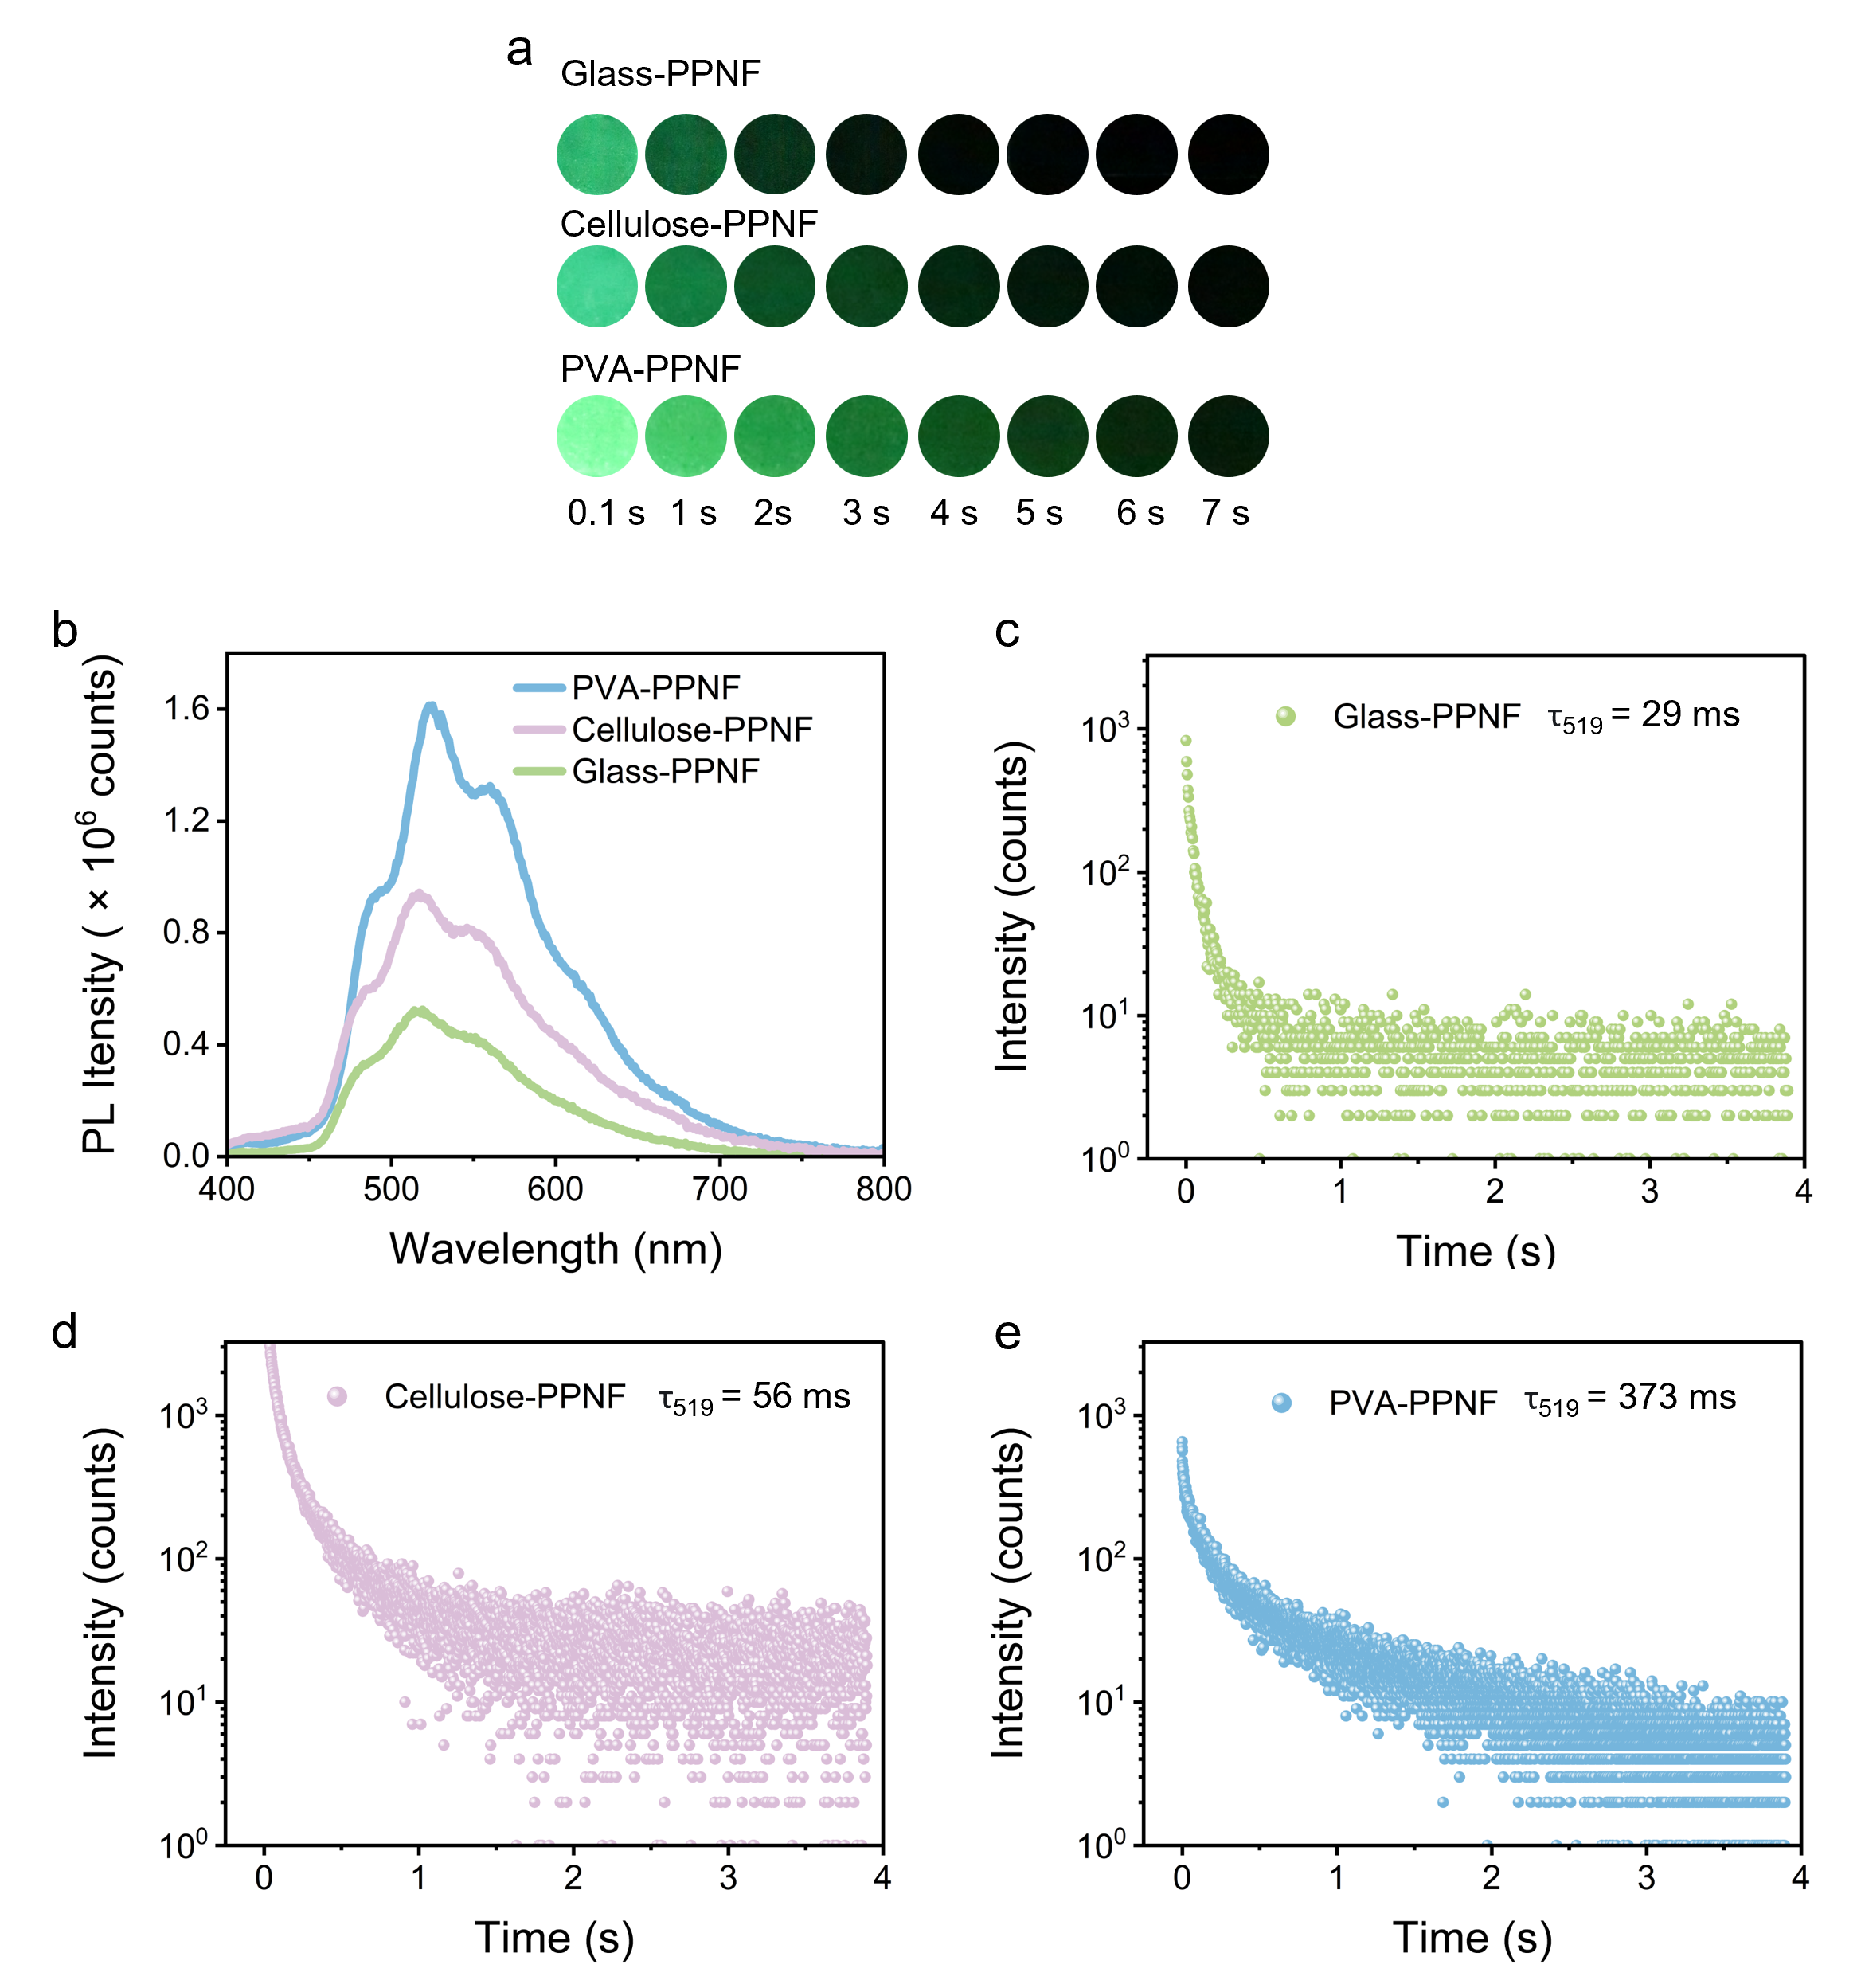


**Supplementary Fig. 3 | Substrate‑dependent phosphorescence properties of PPNFs.** **a,** Time-dependent afterglow images of PPNFs adhered on glass, cellulose, and PVA substrates. **b,** Corresponding phosphorescence spectra. **c-e,** Time-resolved emission-decay profiles of PPNF adhered on glass (c), cellulose (d), and PVA (e) substrates (*λ*ex = 312 nm).

**
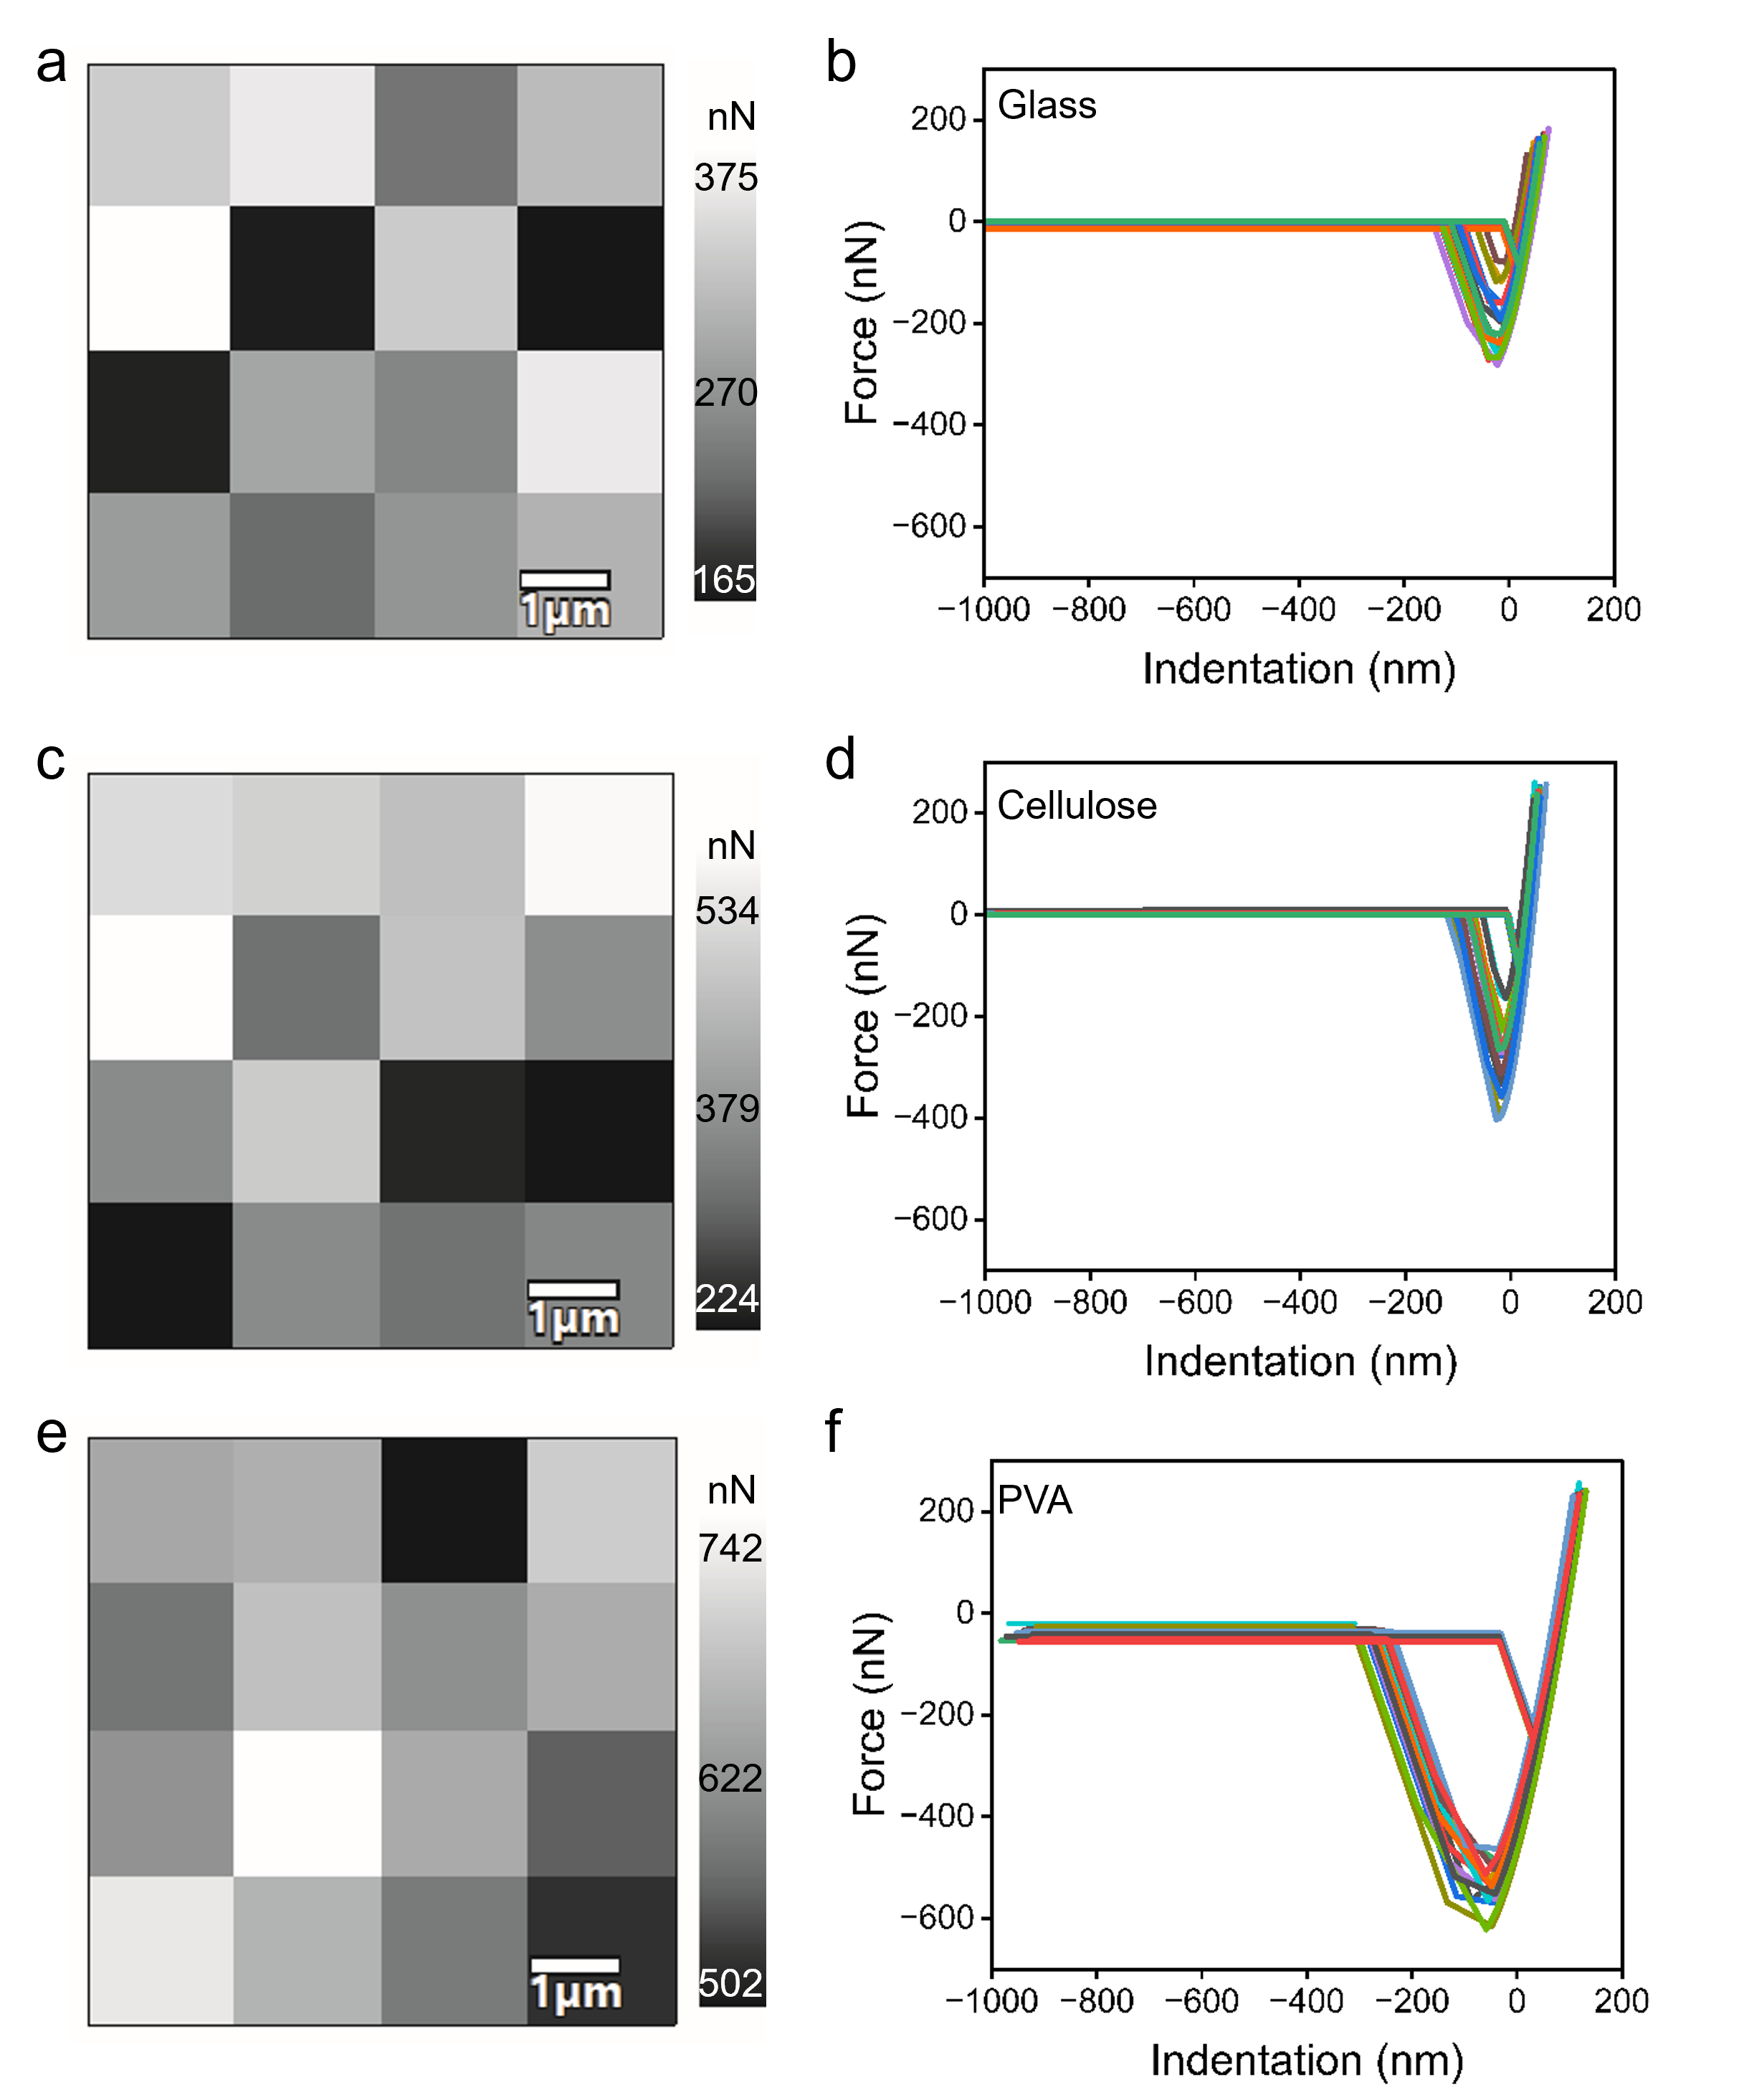
**

**Supplementary Fig. 4 | Adhesion properties of PPNFs on different substrates.** **a, b,** Force mapping of the PPNF adhesion on glass substrate (a) and corresponding force-distance curves (b). **c, d,** Force mapping of the PPNF adhesion on cellulose substrate (c) and corresponding force-distance curves (d). **e, f,** Force mapping of the PPNF adhesion on PVA substrate (e) and corresponding force-distance curves (f).

**
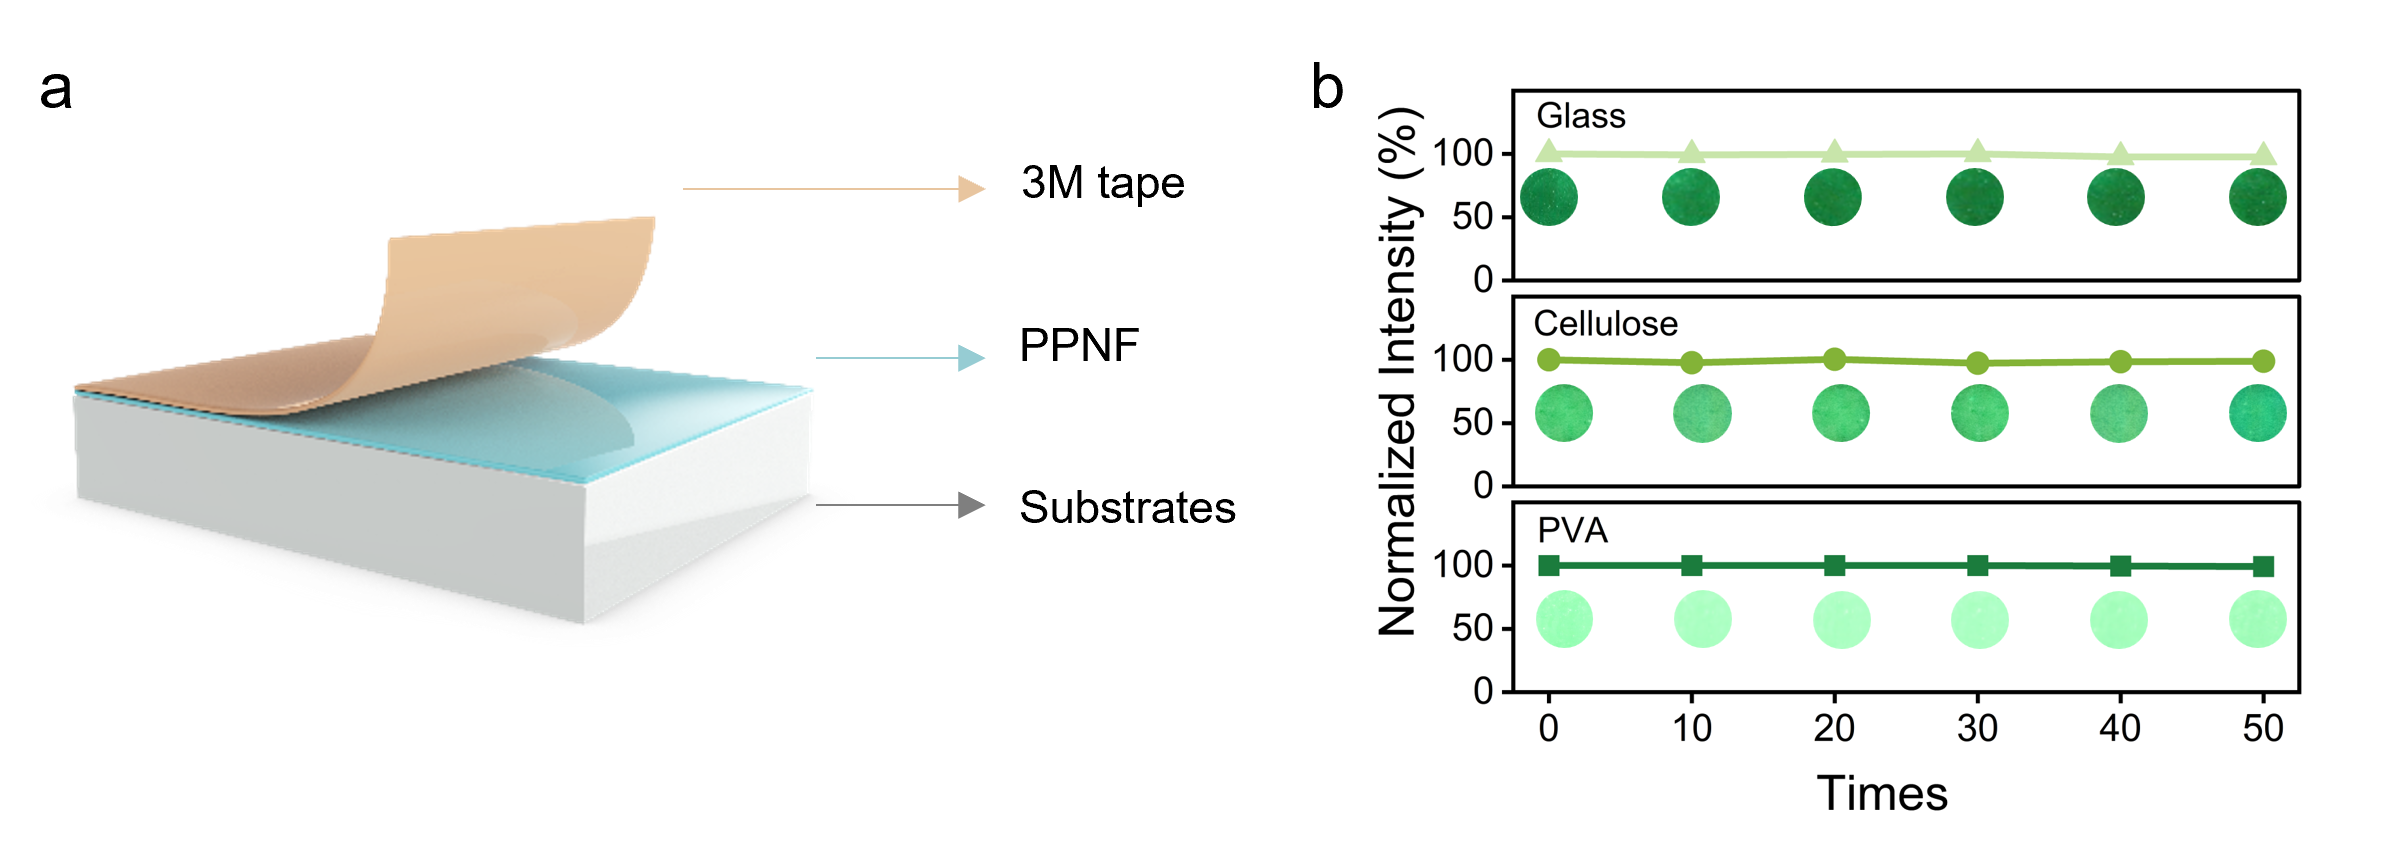
**

**Supplementary Fig. 5 | Adhesion stability of PPNFs on different substrates. a,** Schematic illustration of peeling PPNFs adhered to a substrate using 3M tape. **b,** Phosphorescence intensity and corresponding RTP images of PPNFs adhesion on glass, cellulose and PVA substrates after different numbers of tape-peeling cycles. The results demonstrate the exceptional resistance of the PPNFs to mechanical perturbation.


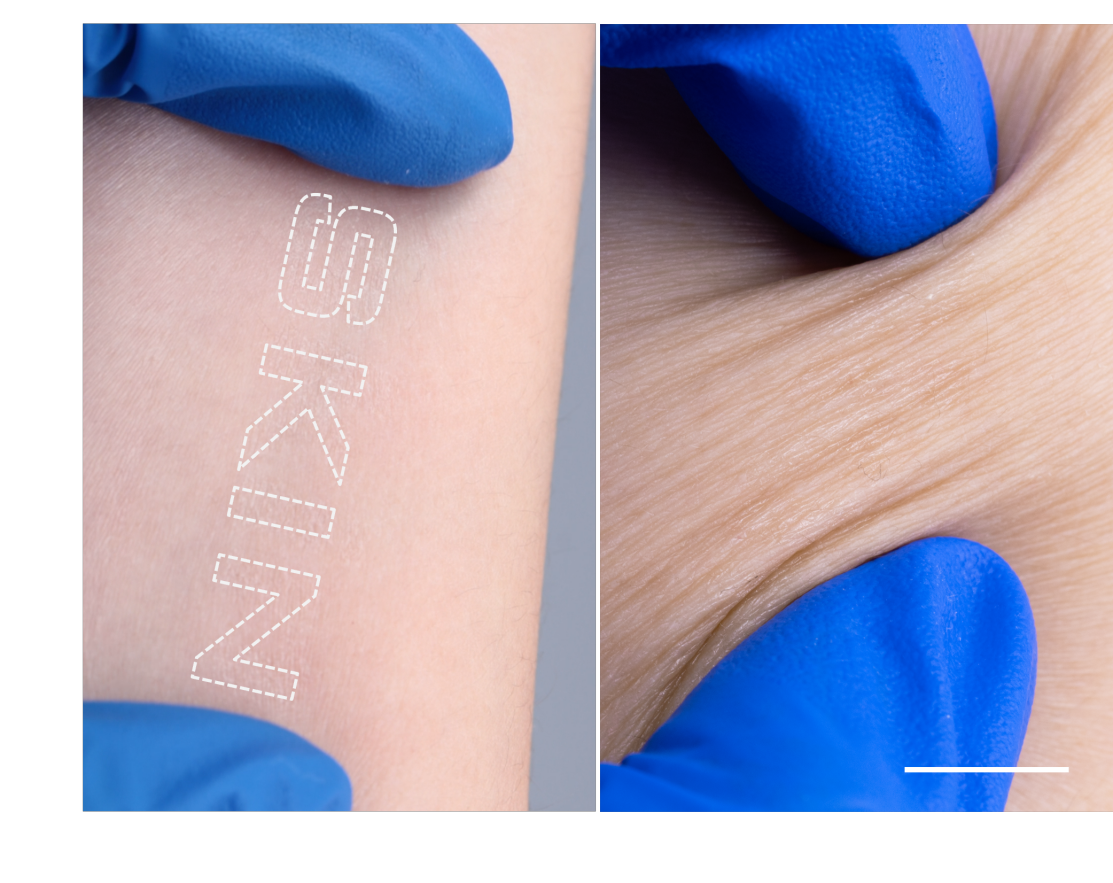


**Supplementary Fig. 6 | Conformability of PPNF on skin.** Photographs of a PPNF label adhered to the arm under tensile deformation (left) and compressive deformation (right). When applied to human skin, the PPNF maintains full contact during tensile and compressive deformation without delamination or damage. The mechanical conformability and adhesion strength of the PPNF to the biological tissue surface depend on the bending stiffness (*D*) of the PPNF, which is given by the equation, , where *E*, *t*, and ν are Young's modulus, thickness, and Poisson's ratio of the PPNF, respectively. With *E* = 2.14 GPa, *v* = 0.3, the 400 nm PPNF exhibits an ultralow bending stiffness of 1.25 × 10-2 nN·m, comparable to that of soft biological tissues (10-4-10-1 nN·m)2. This places the film in a regime where it can readily follow microscale surface undulations of skins. Scale bar, 1 cm.

**
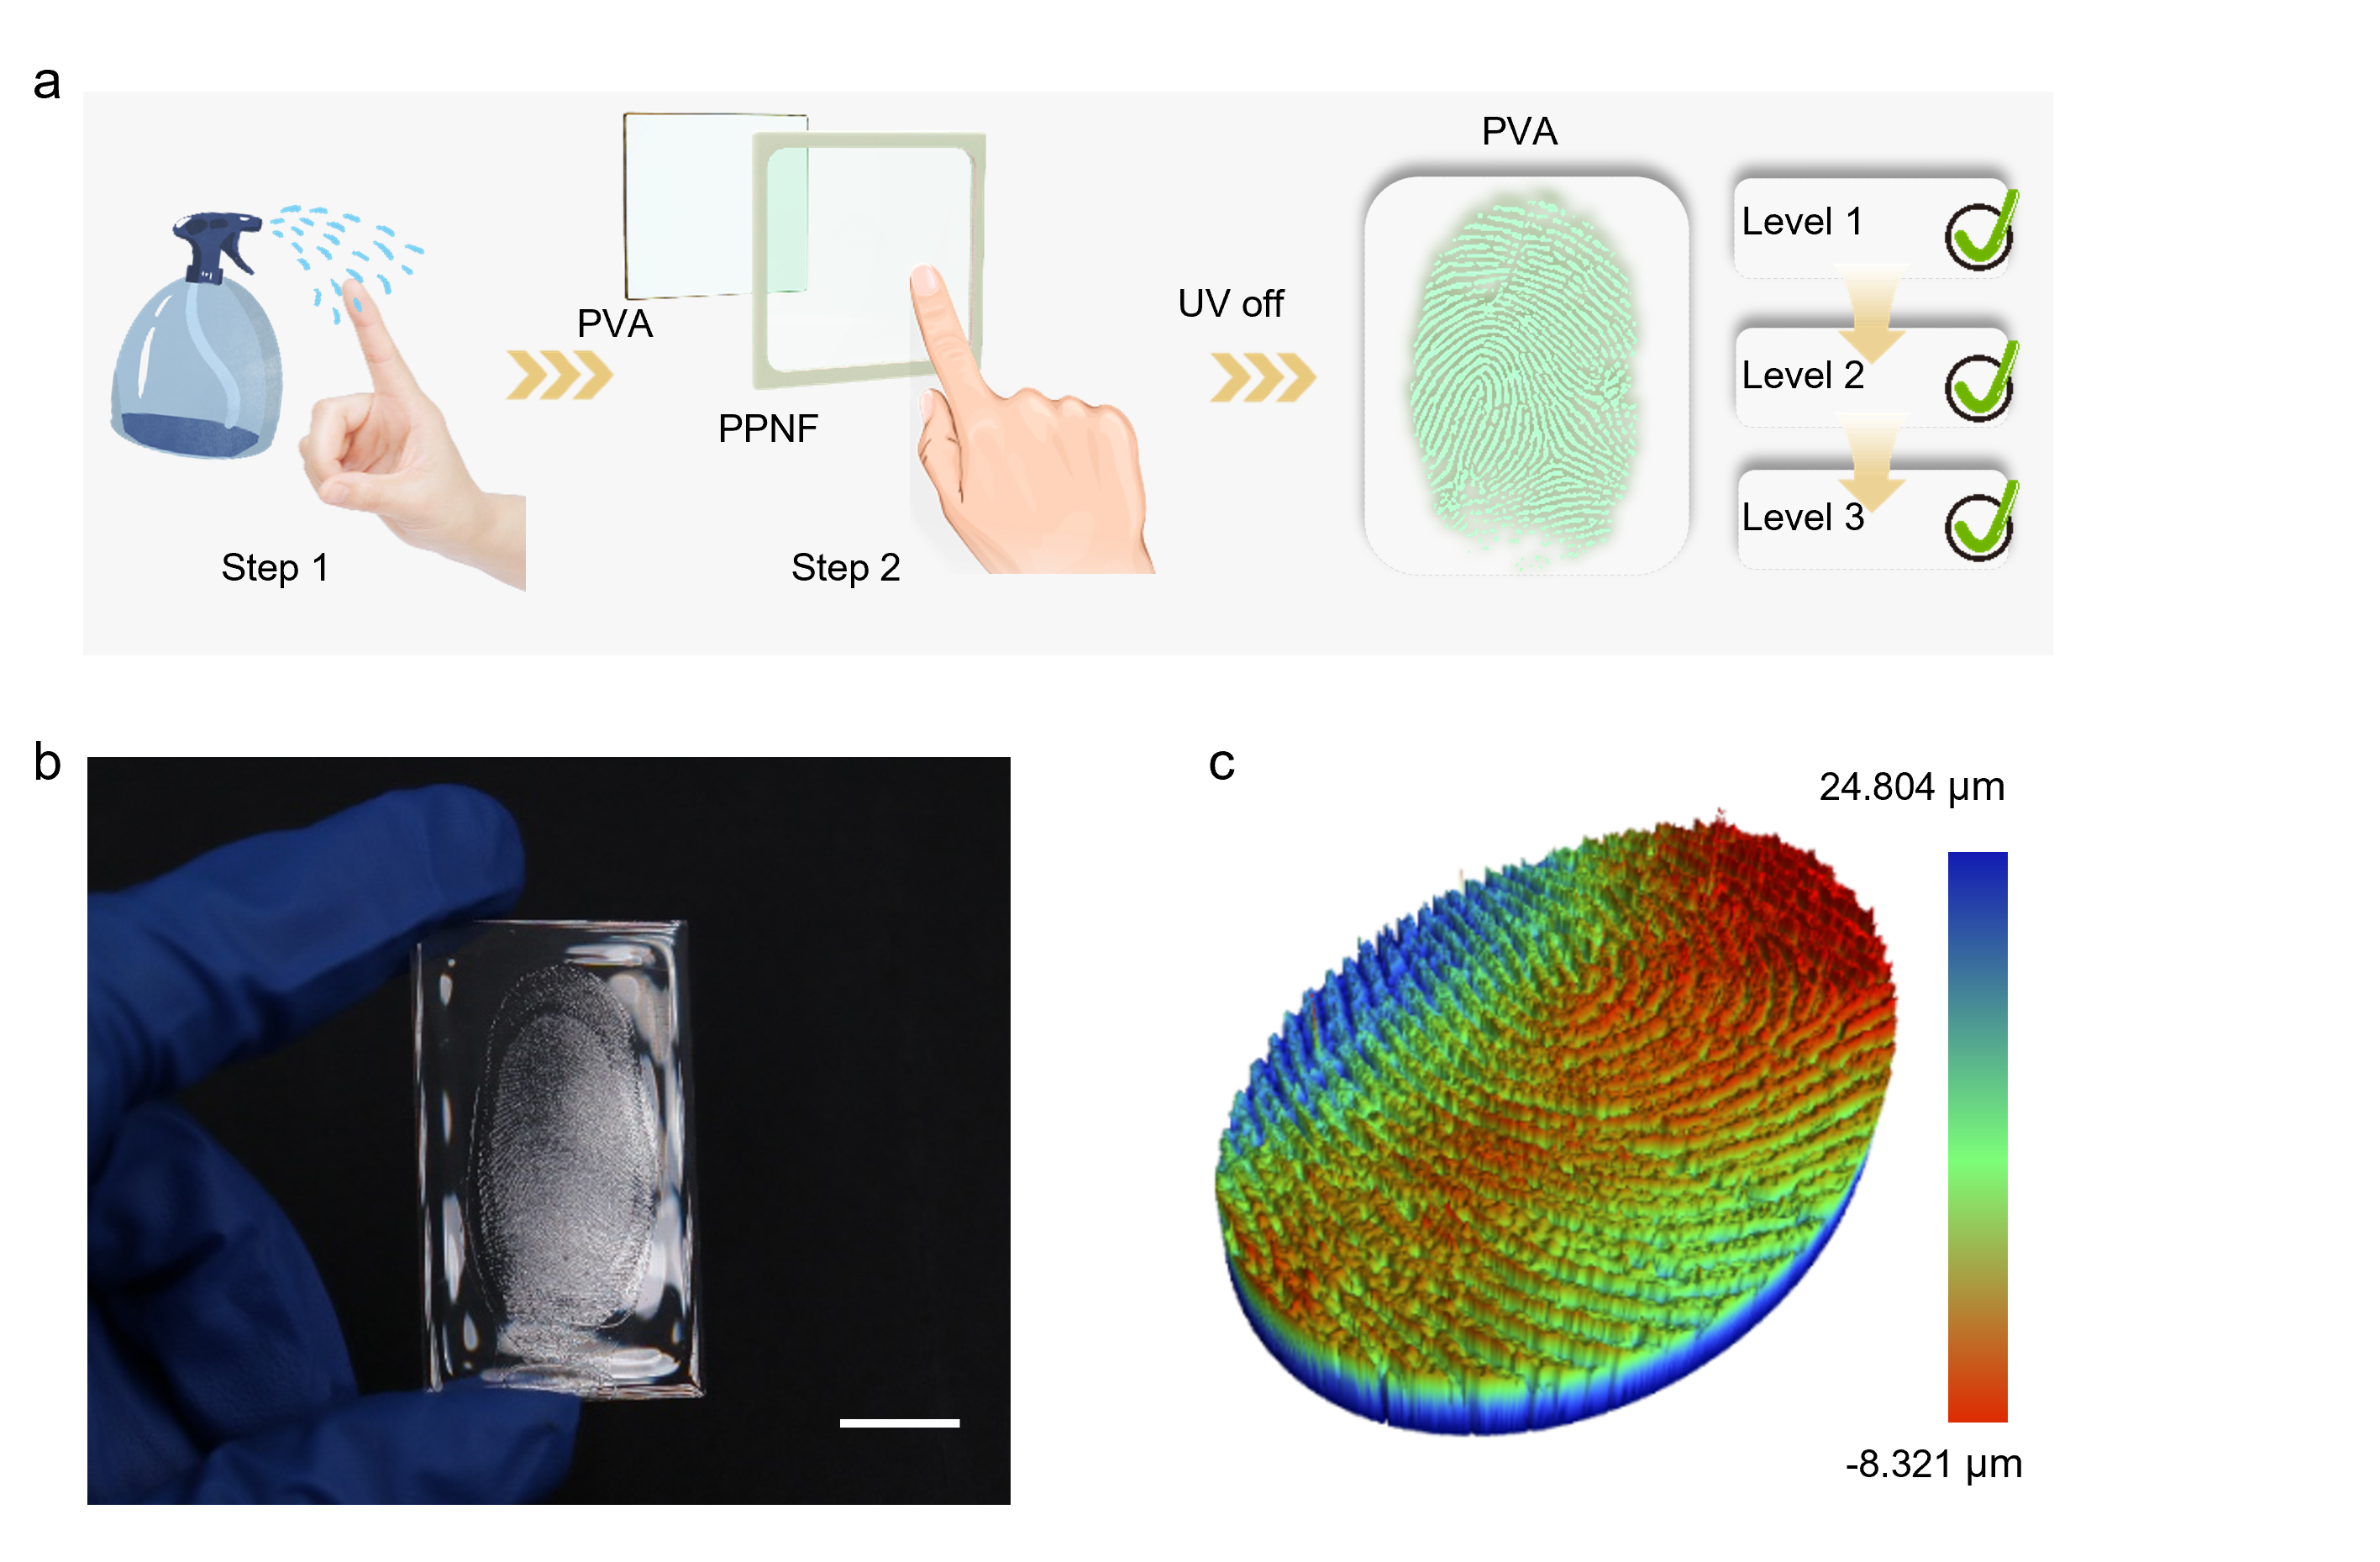
**

**Supplementary Fig. 7 | Fingerprint extraction using the PPNF. a,** Schematic illustration of the fingerprint collection process. **b,** Photograph of a fingerprint collected using the PPNF under white-light illumination. Scale bar, 1 cm. **c,** Three-dimensional height map of the fingerprint pattern.

**
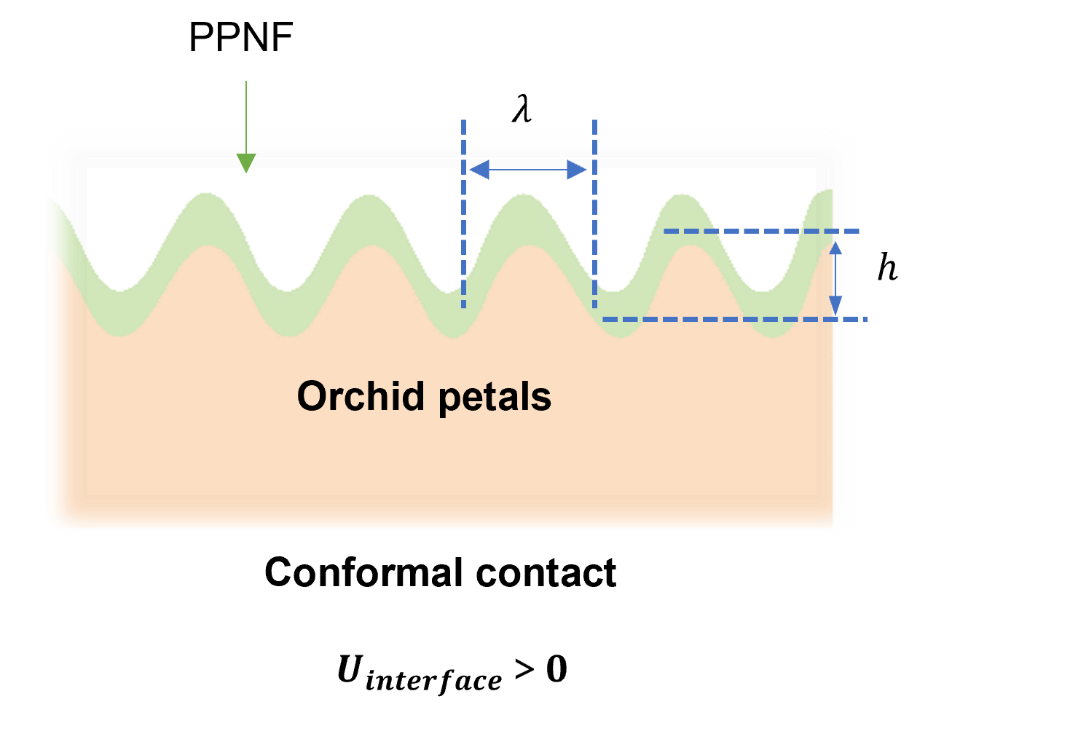
**

**Supplementary Fig. 8 | Schematic illustration of a PPNF conformally adhered to a wrinkled surface mimicking an orchid petal.** Conformal contact occurs when *U*interface > 0. The width and depth of the surface furrows are denoted by *λ* and h, respectively.


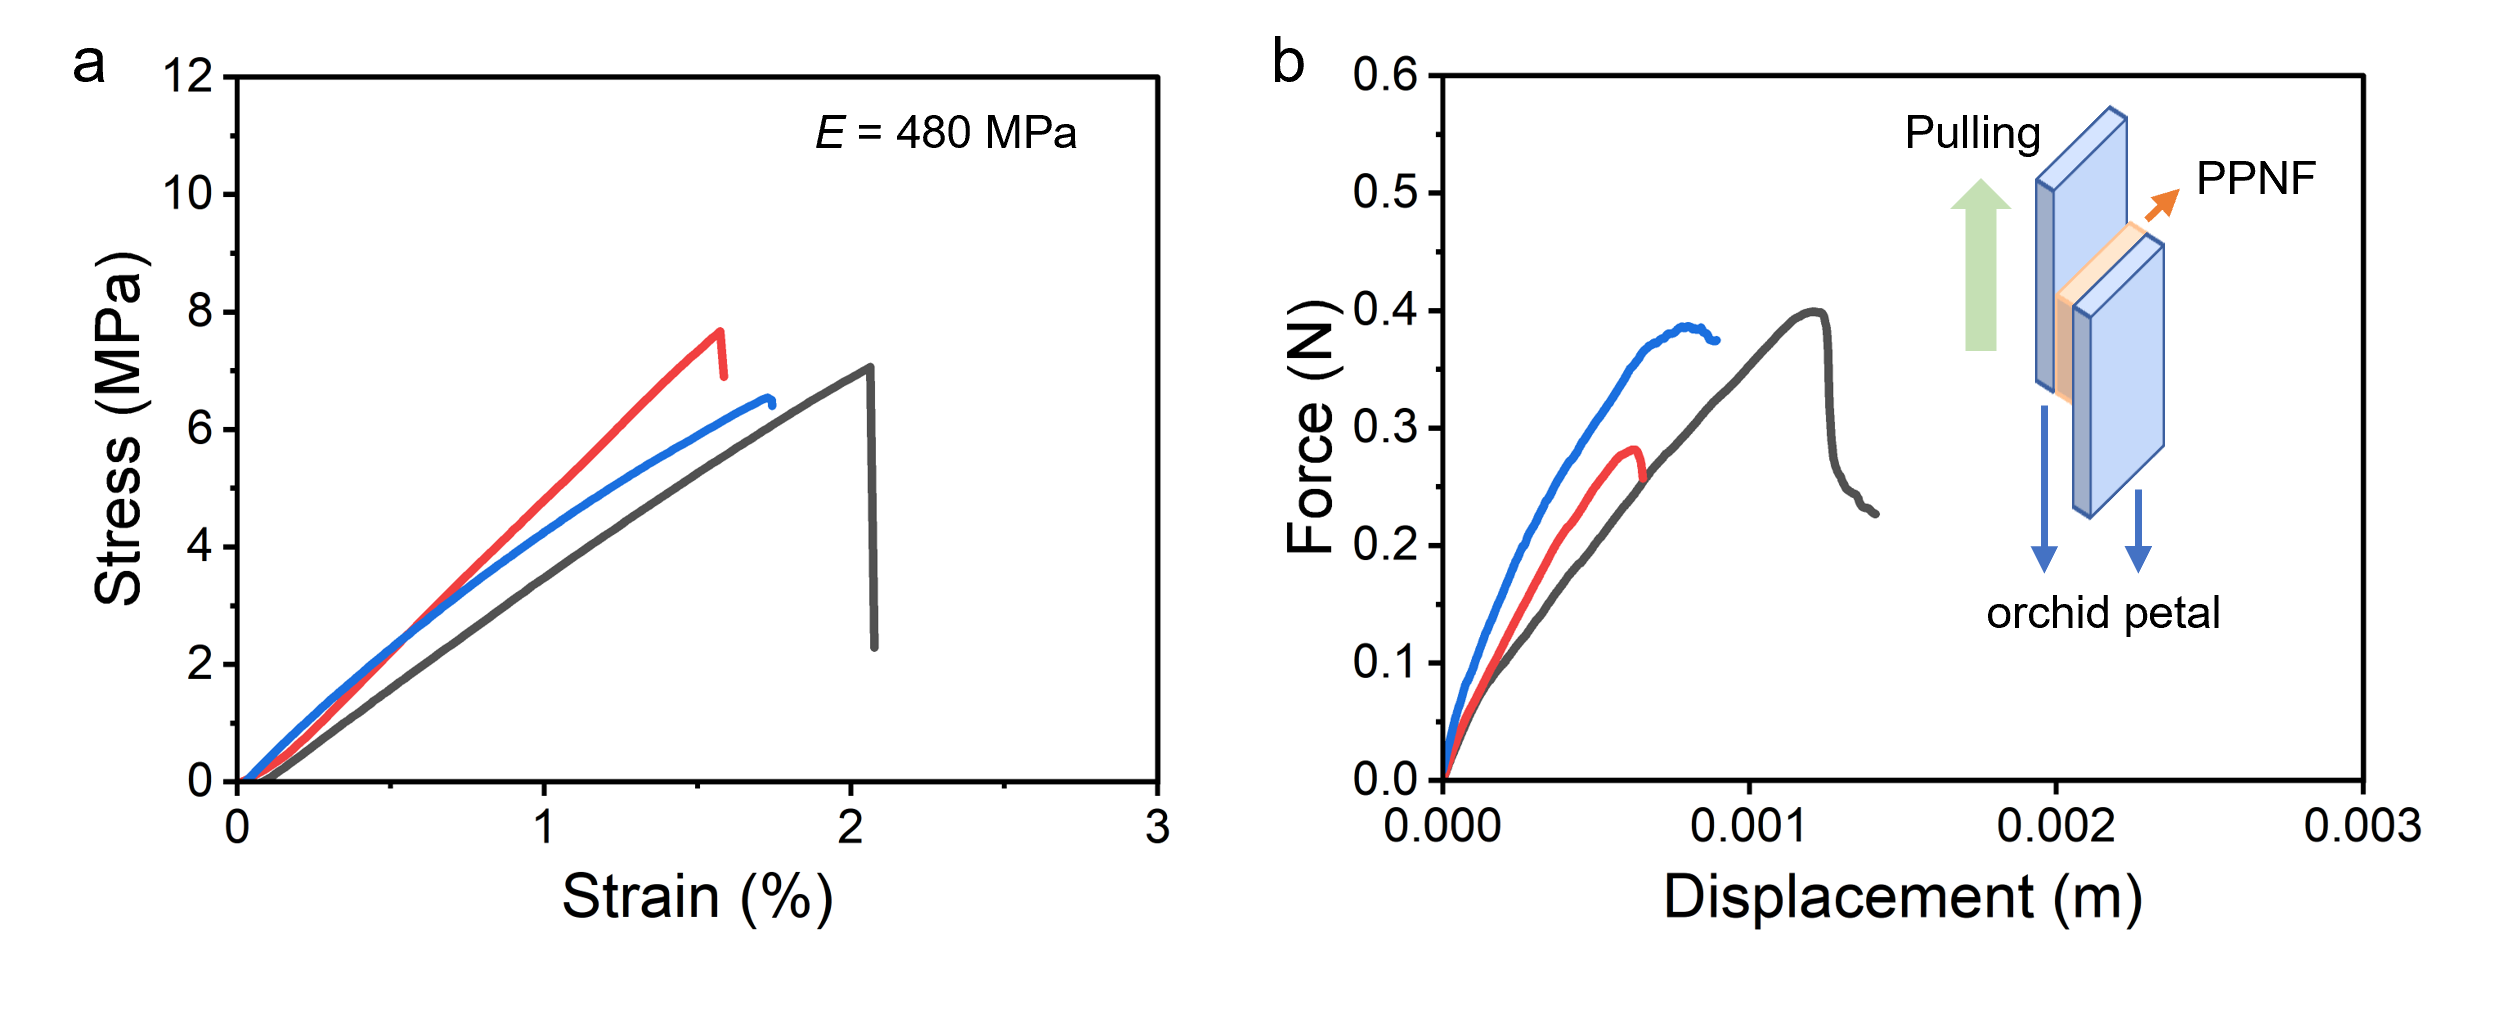


**Supplementary Fig. 9 | Mechanical properties of orchid petals and adhesion characteristics between PPNFs and orchid petals. a,** Tensile stress-strain curves of orchid petal under dry conditions. **b,** Adhesion force separation distance curves of the PPNF and orchid petals. The experimentally measured average adhesion energy 𝛾 between the PPNF and the petal is1.22 N m-1. Inset: Schematic illustration of the peeling test between PPNF and orchid petal.

**
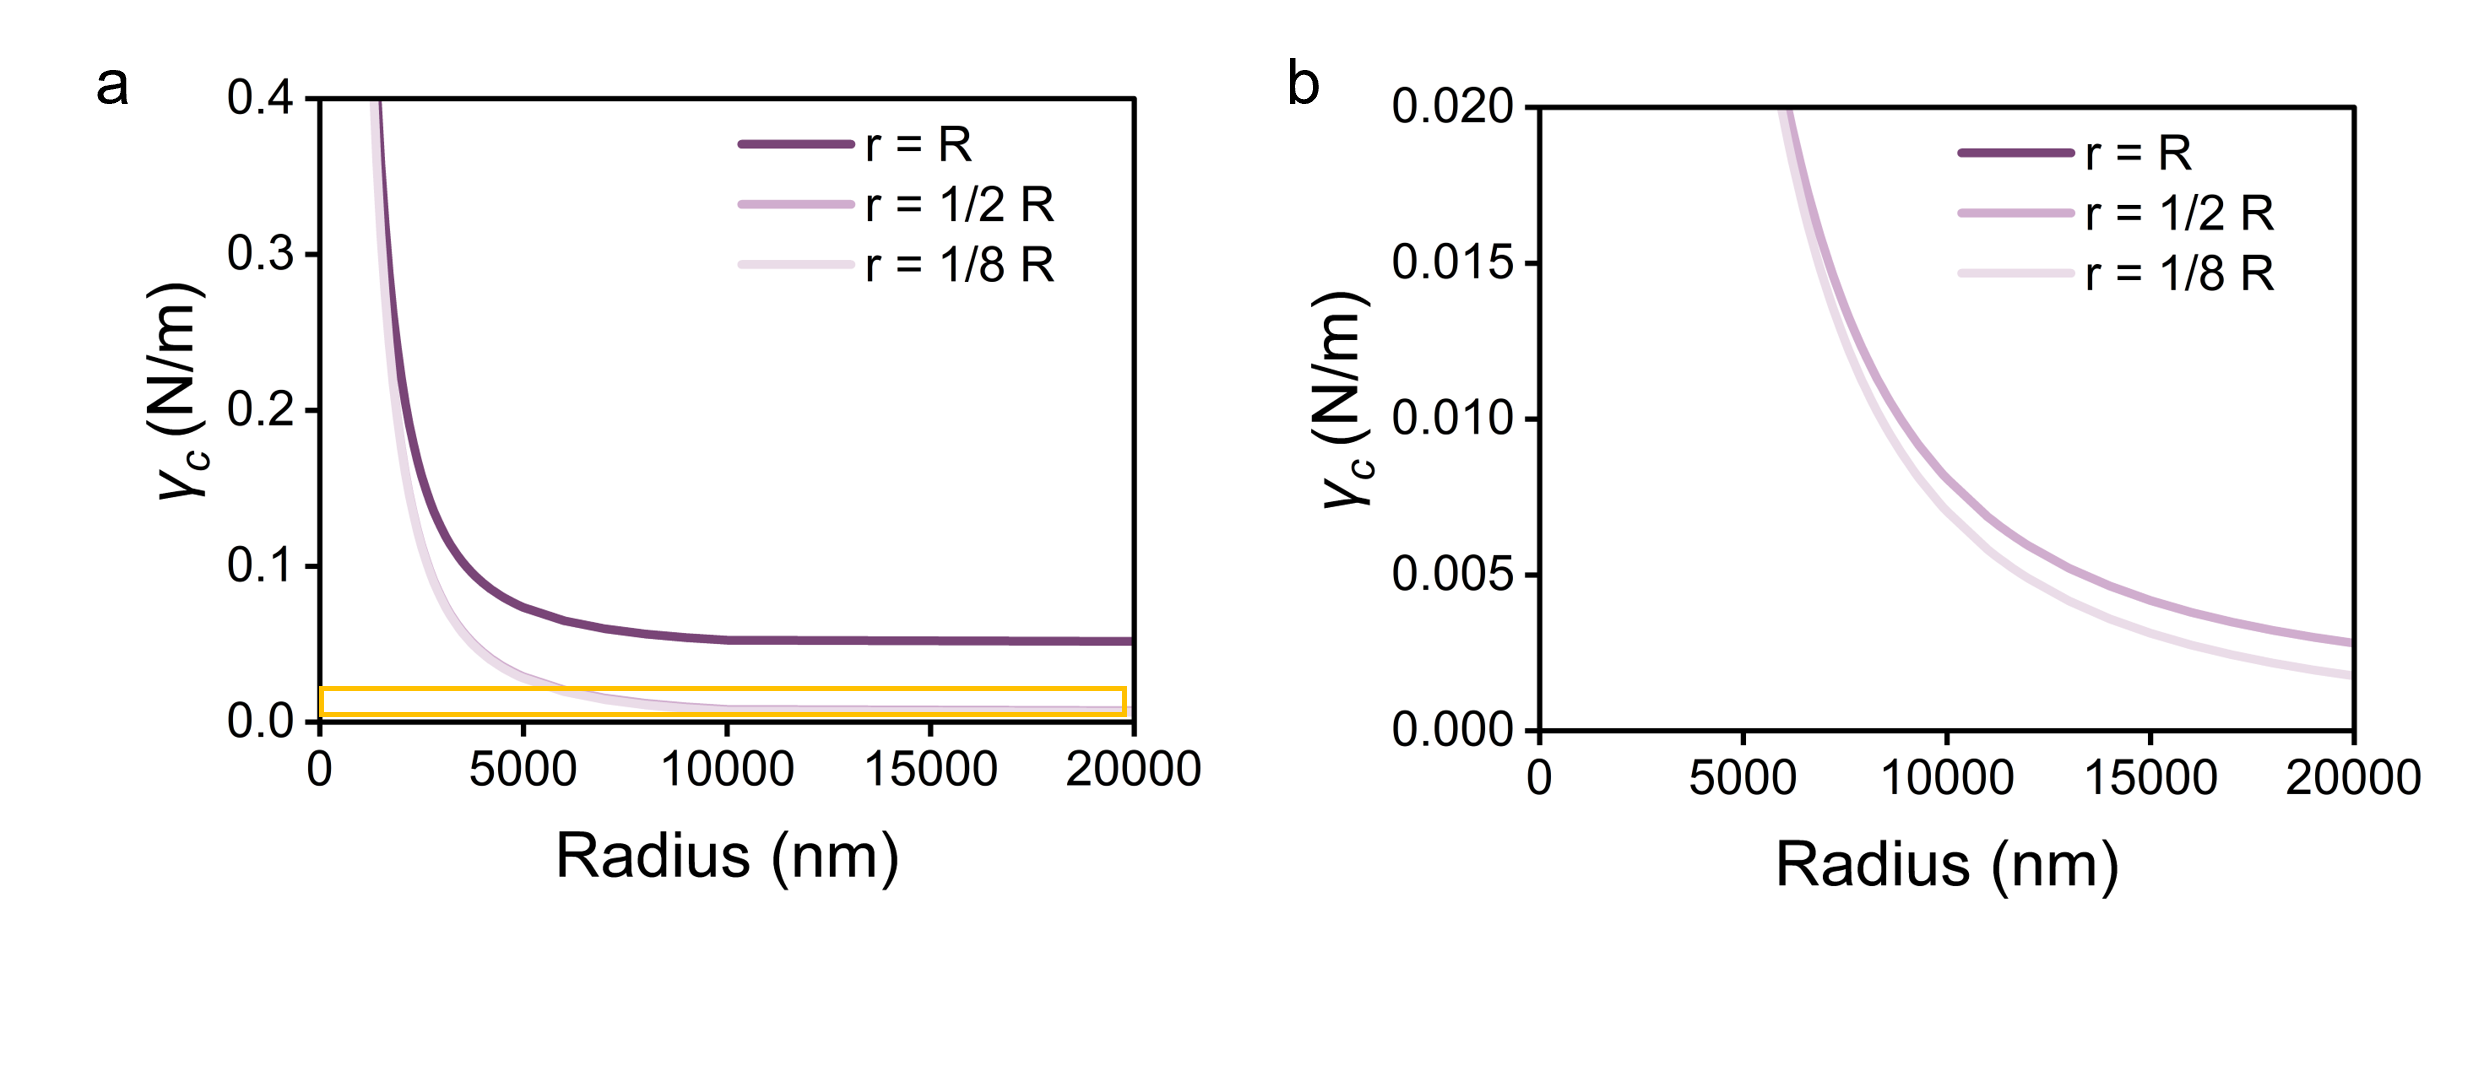
**

**Supplementary Fig. 10 | Conformal wrapping behavior of PPNFs on spherical substrates. a,** Critical adhesion energy for conformal wrapping of PPNFs with different radii (r) as a function of substrate sphere radius (R). **b,** Magnified view of the orange-boxed region in (a).

**
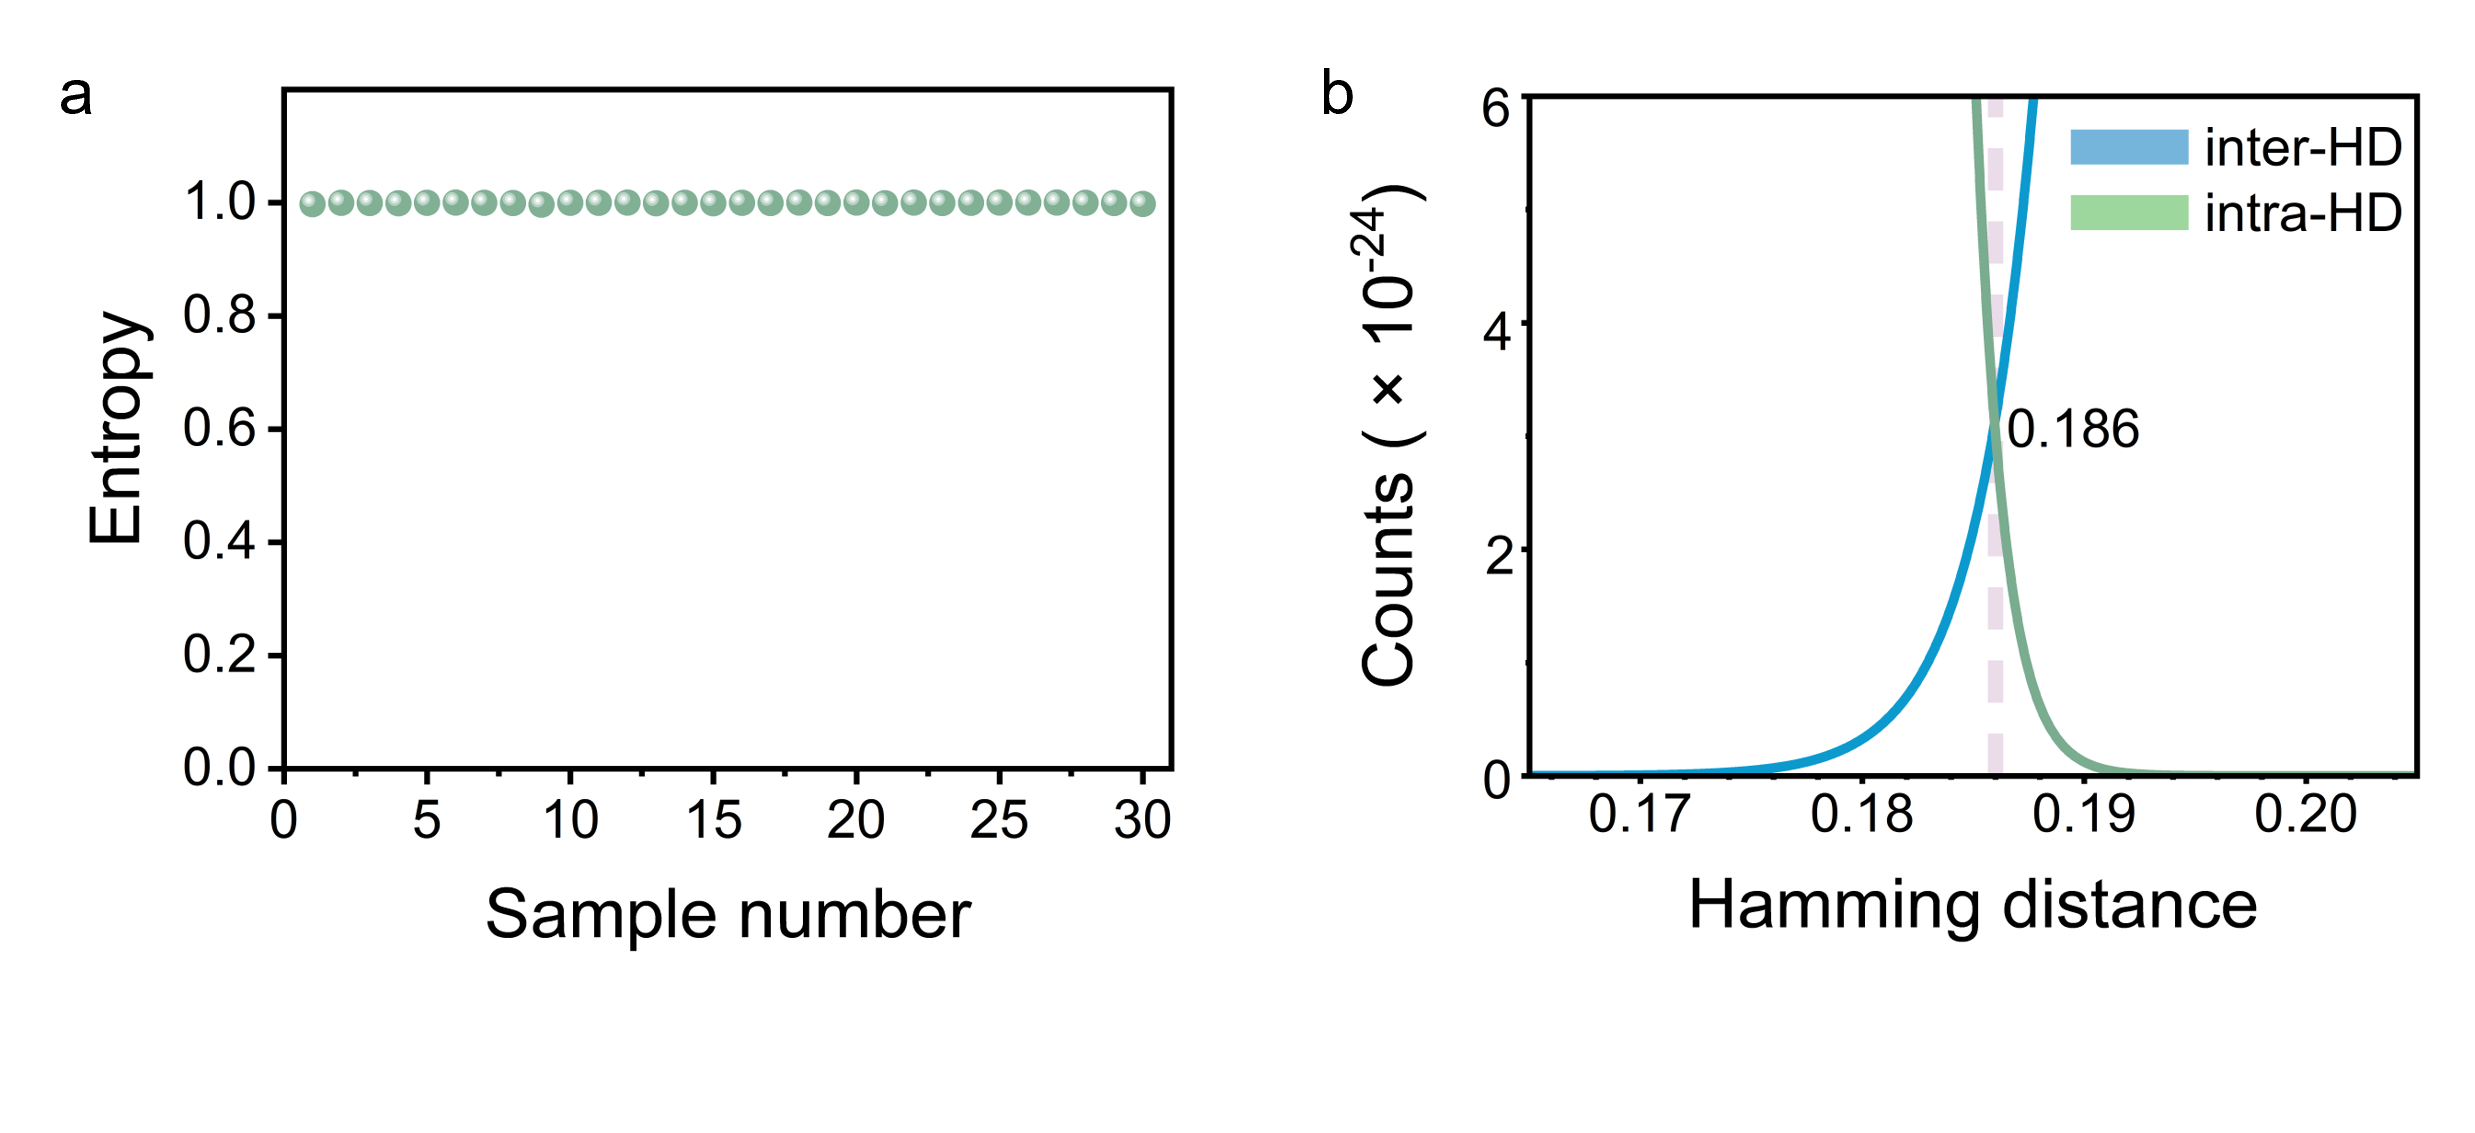
**

**Supplementary Fig. 11 | Statistical characteristics of the PUF labels. a,** Entropy of 30 distinct PUF labels. The entropy values are close to the ideal maximum of 1 bit, indicating high randomness. **b,** The authentication threshold of 30 distinct PUF labels.

**
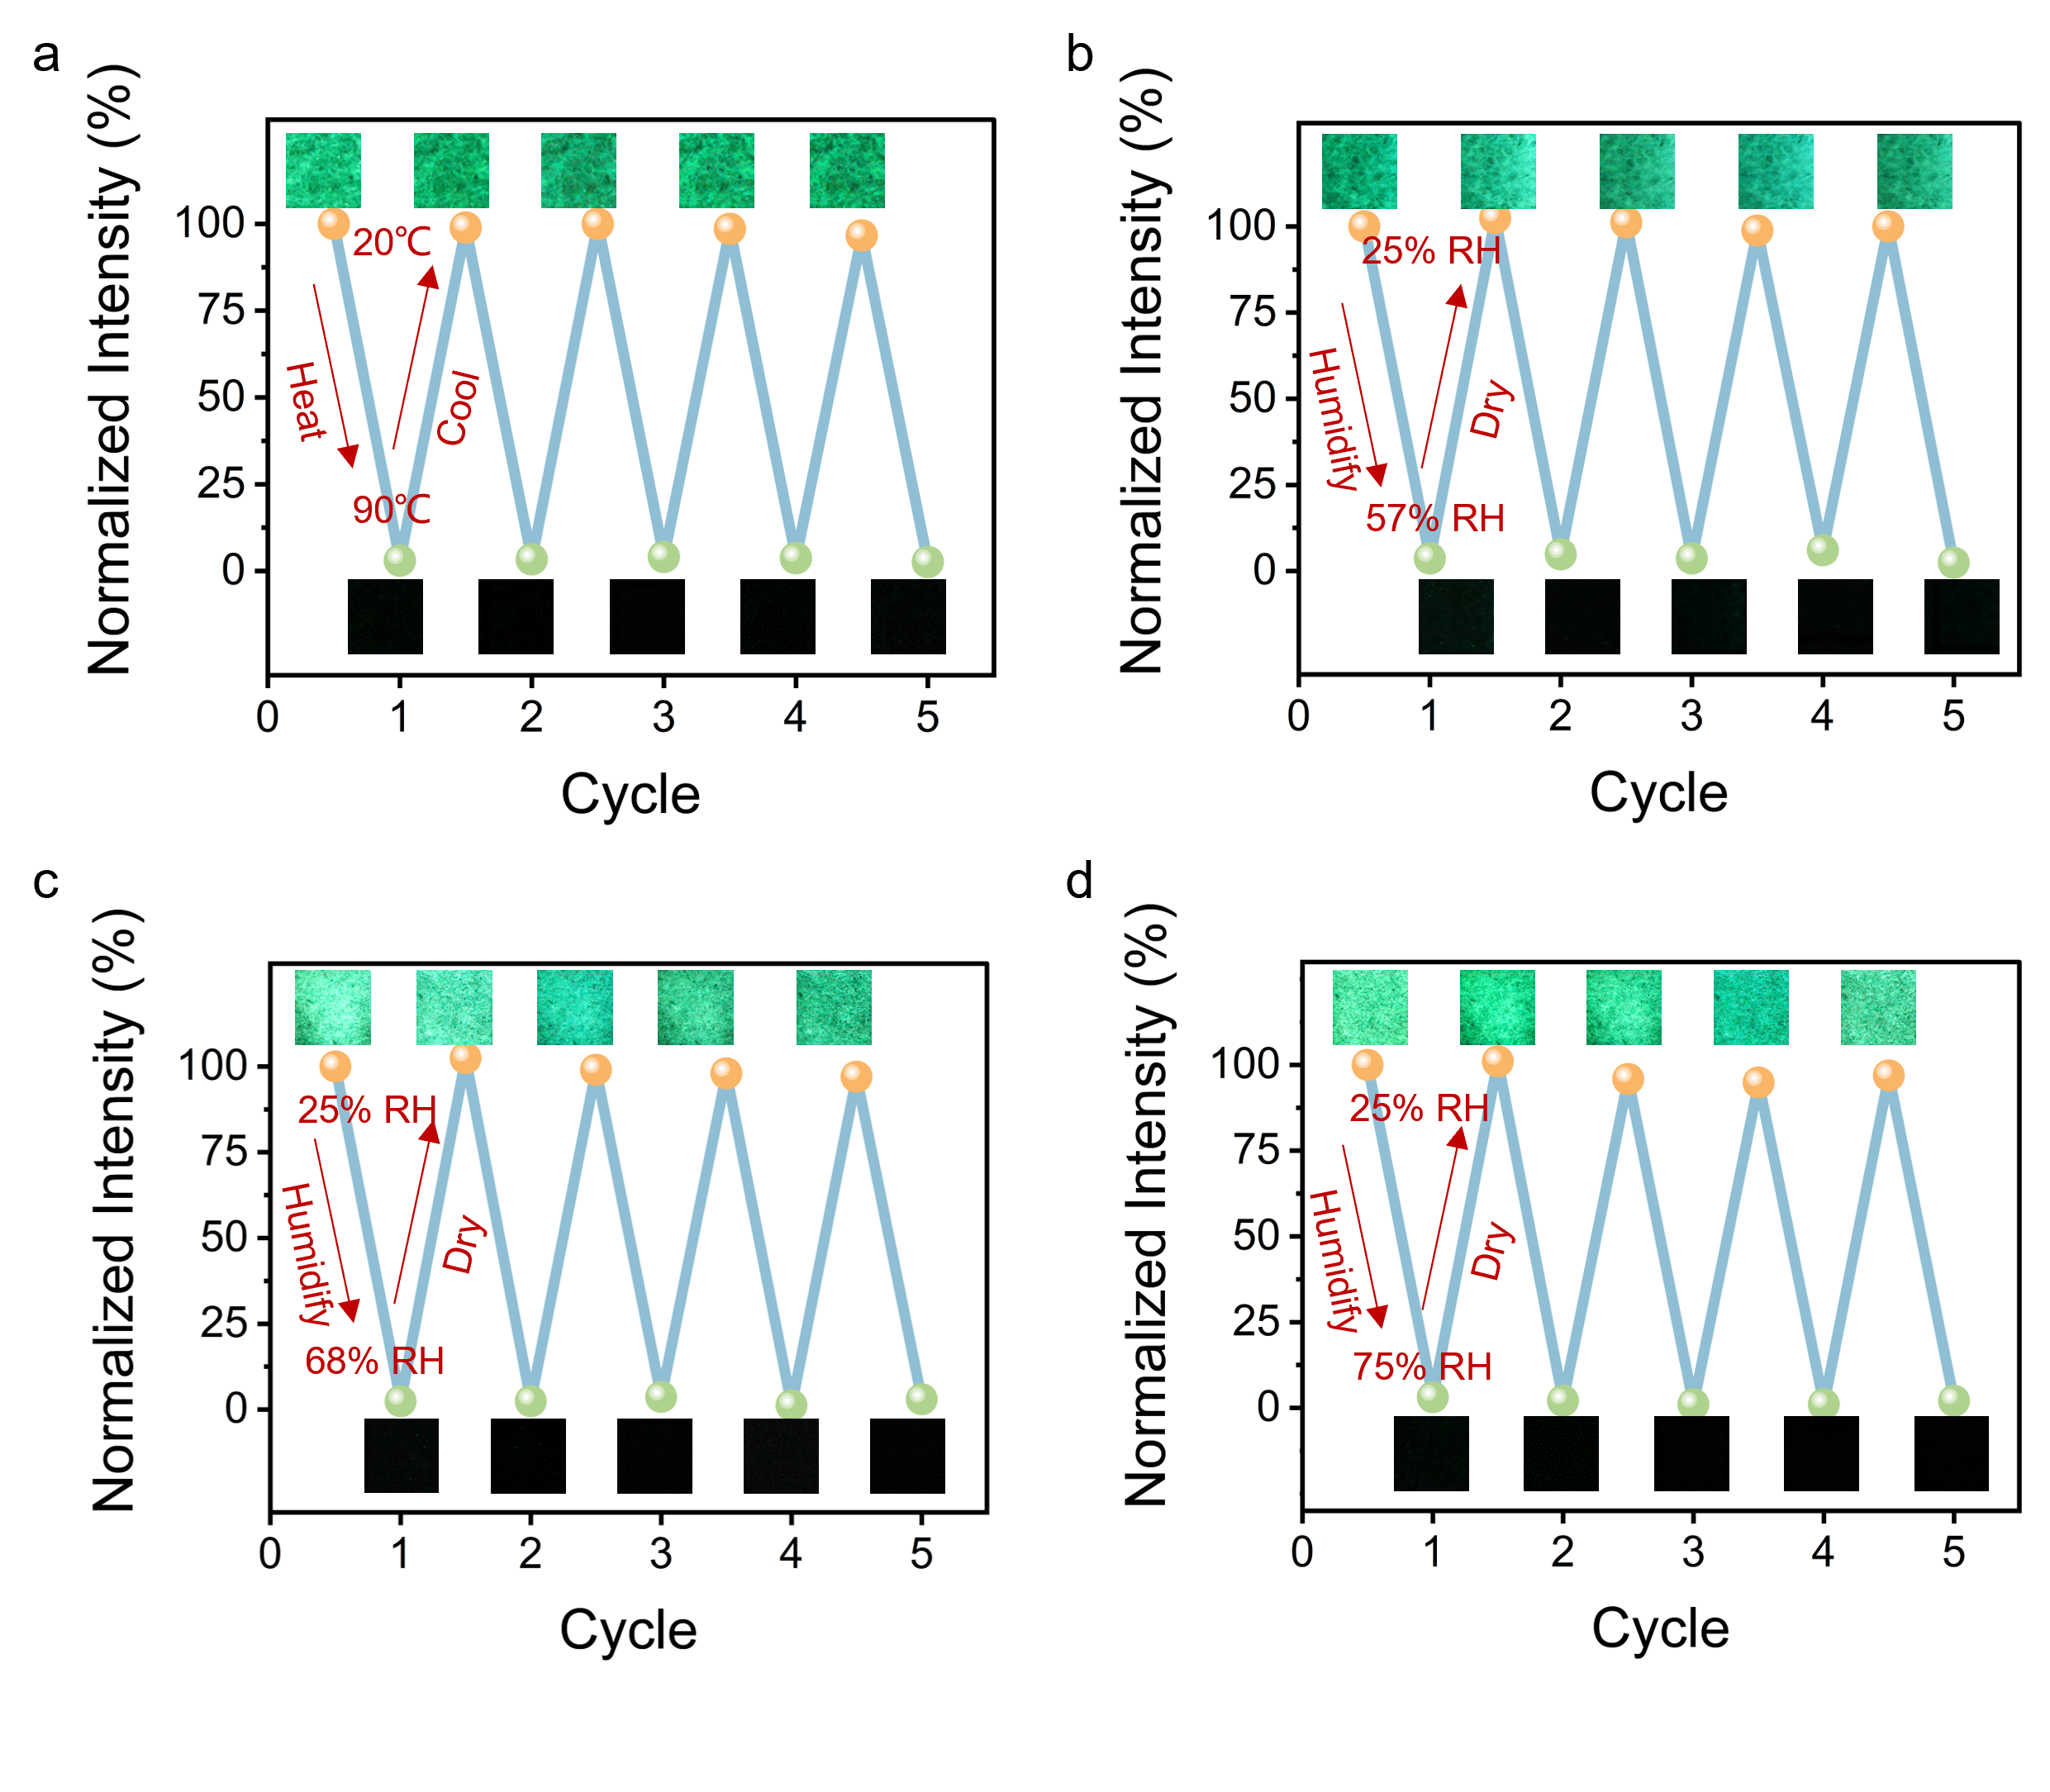
**

**Supplementary Fig. 12** | **Influence of temperature and humidity on the RTP performance of PPNF labels adhered to Xuan paper.** **a,** RTP intensity variations during heating/cooling cycles and the corresponding phosphorescence photographs after heating and cooling. The sample was heated to 90 °C under 30% relative humidity. The PPNF exhibits excellent reversible thermo-responsive behavior. **b-d,** RTP intensity variations during alternating high-humidity and drying cycles, together with the corresponding phosphorescence photographs at 57% RH (b), 68% RH (c), and 75% RH (d), and after drying. The PPNF exhibits excellent reversible humidity-responsive behavior. Spectra were normalized such that the maximum intensity of the untreated sample was set to 100%.

**
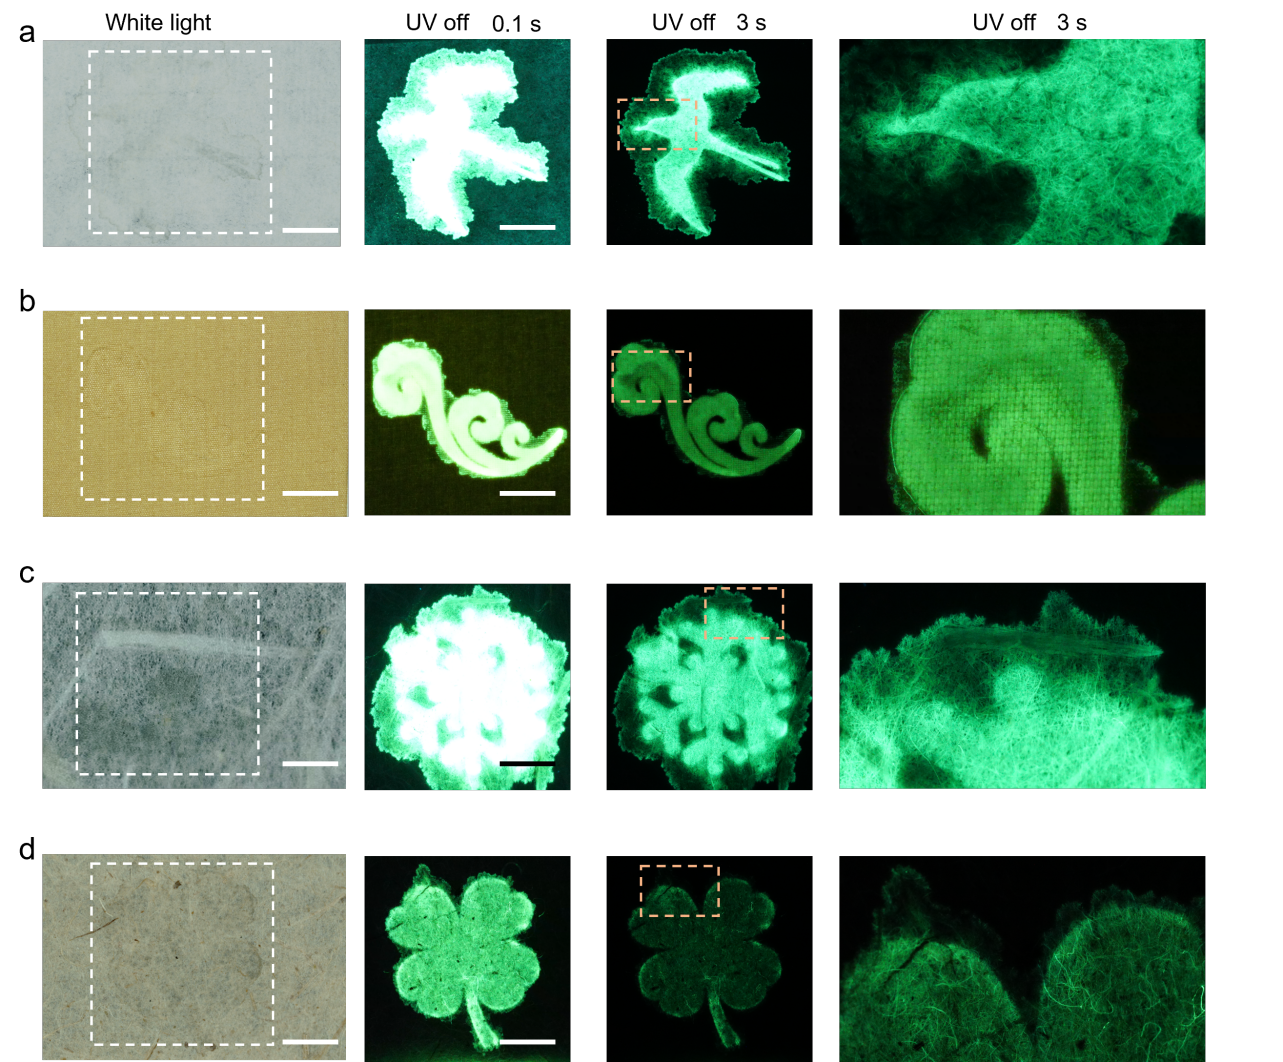
**

**Supplementary Fig. 13 | Spray‑coated RTP patterns on different substrates. a,** Visible‑light photograph and corresponding afterglow image of a swallow pattern spray-coated on Xuan paper. The dashed box in the visible light photograph indicates the location of the RTP pattern. **b,** Visible‑light photograph and corresponding afterglow image of an auspicious cloud pattern on silk. **c,** Visible‑light photograph and corresponding afterglow image of a snowflake pattern on linen. **d**, Visible‑light photograph and corresponding afterglow image of a four-leaved clover pattern on bast paper. Compared with nanofilm-based patterning, sprayed phosphorescent patterns exhibit limited precision, non-uniform film coverage, and reduced spatial resolution. Scale bars, 1 cm.

**
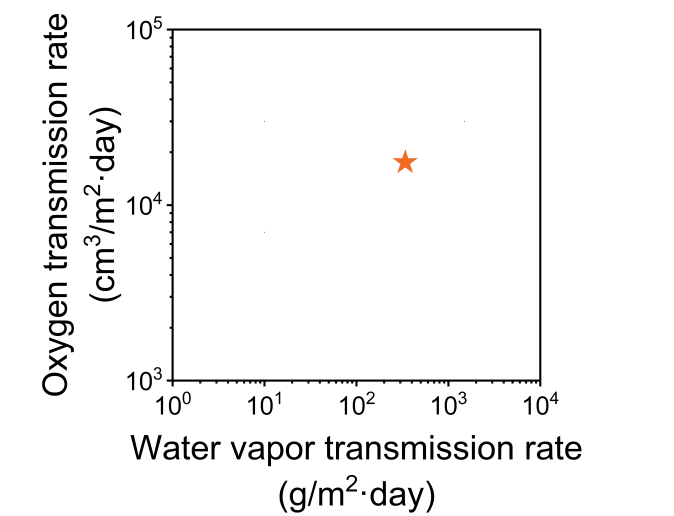
**

**Supplementary Fig. 14 | Oxygen transmission rate and water vapor transmission rate of the PPNF.** PPNF is composed of stacked nanospheres with nanoscale pores that permit the efficient transport of water and oxygen, thereby ensuring normal transpiration and photosynthesis of the plants without adversely affecting their growth1.

**
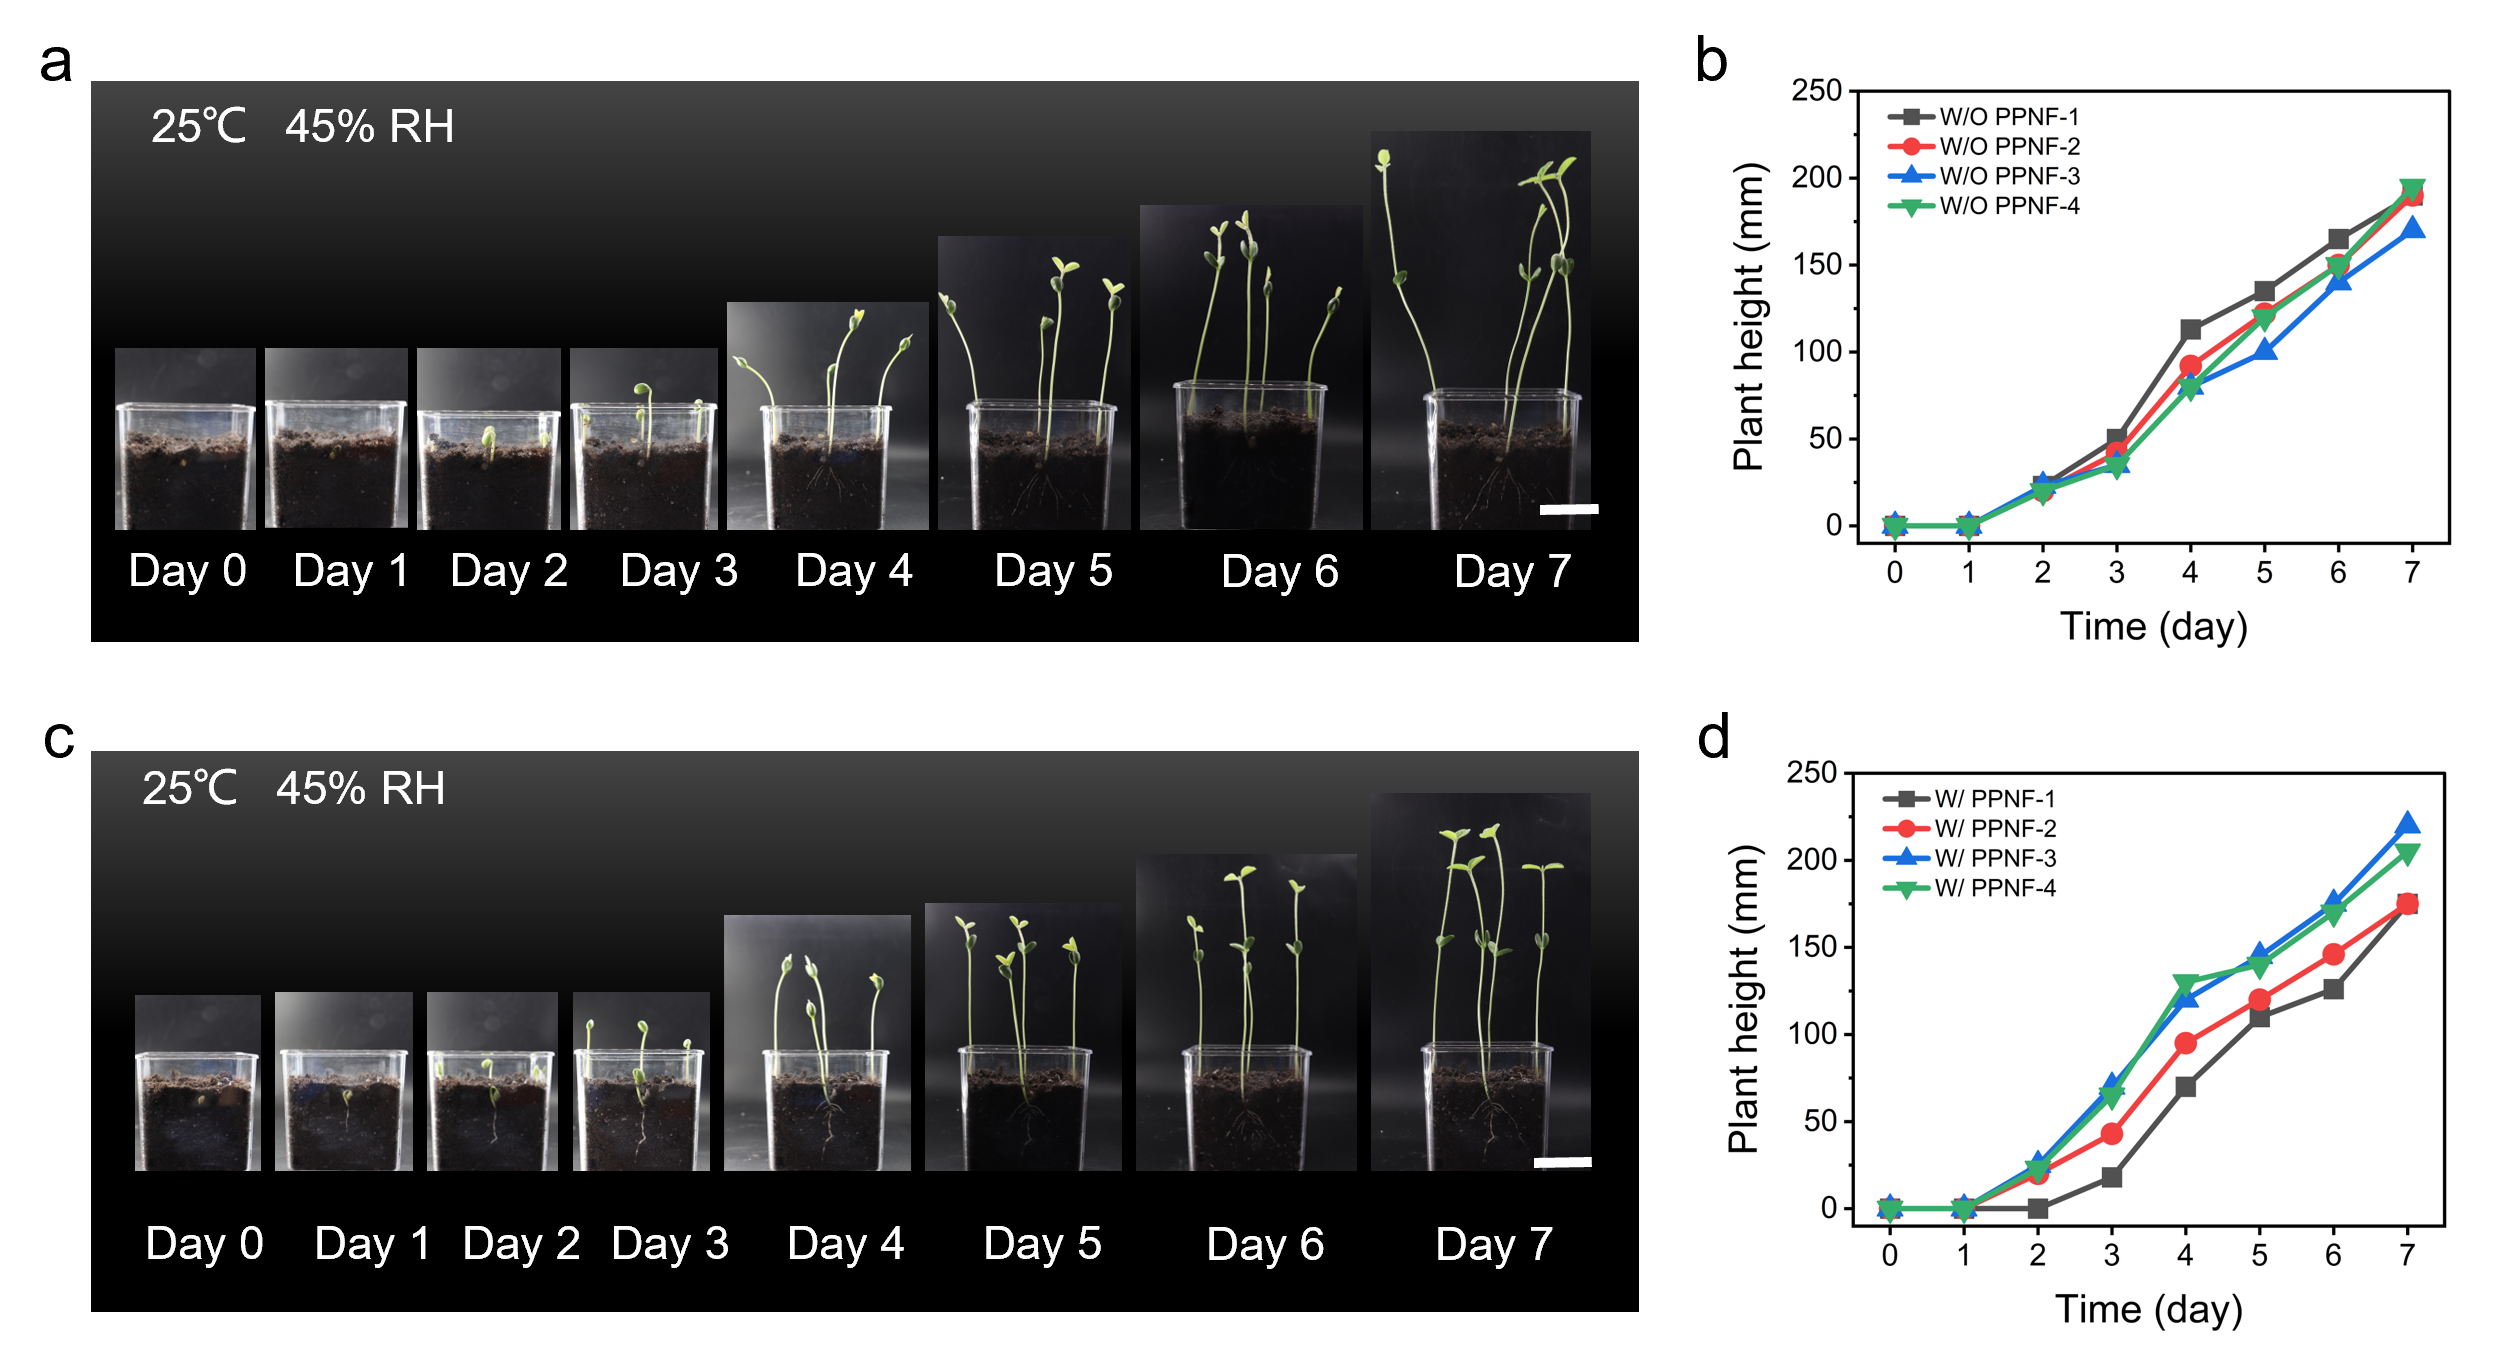
**

**Supplementary Fig. 15 |Effect of PPNF wrapping on bean sprout growth. a,** Photographs showing the growth process of bean sprouts without PPNF wrapping. **b,** Plant height of bean sprouts grown without PPNF wrapping. **c,** Photographs showing the growth process of bean sprouts wrapped with PPNFs. **d,** Plant height of bean sprouts wrapped with PPNFs. Scale bars, 5 cm.


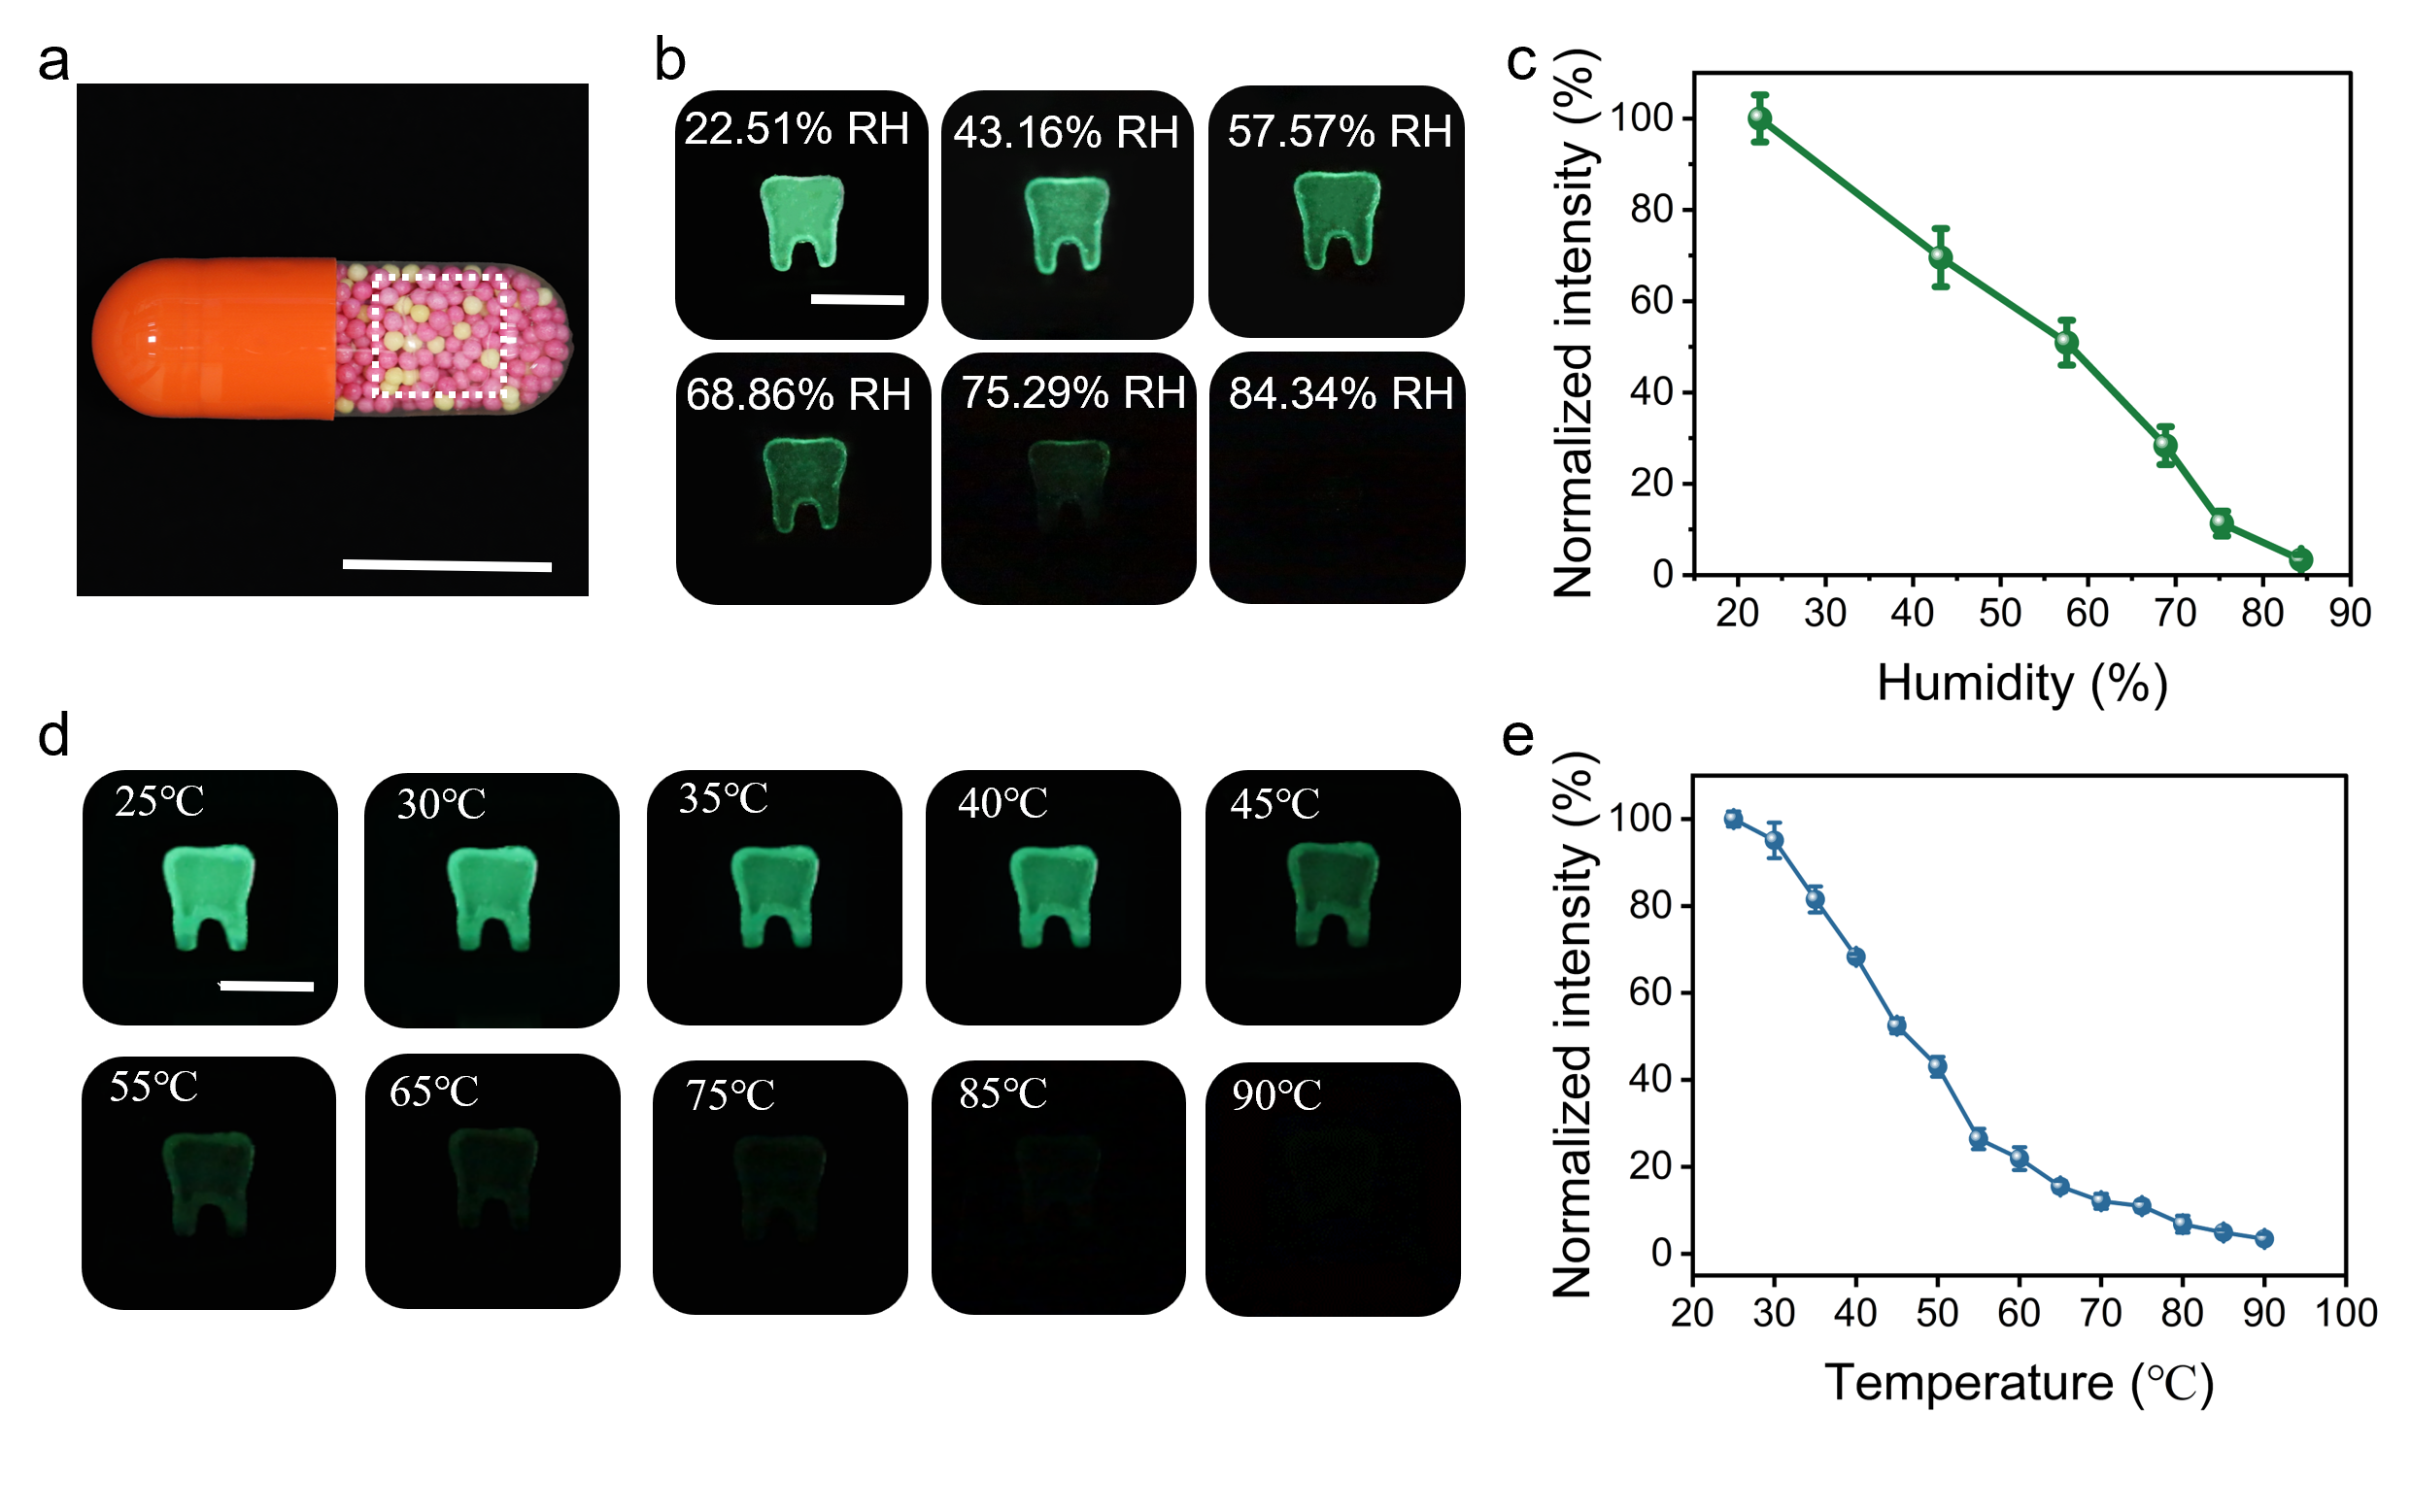


**Supplementary Fig. 16 | Sensing application of PPNF on pharmaceuticals. a,** Photograph of a PPNF label attached to a capsule under white-light illumination. Scale bar, 1 cm. **b,** Afterglow images of the PPNF label recorded under different humidity conditions. **c,** Normalized RTP intensity of the PPNF label as a function of relative humidity. **d,** Afterglow images of the PPNF label recorded at different temperatures. **e,** Normalized RTP intensity of the PPNF label as a function of temperature. Scale bars, 5 mm.

**
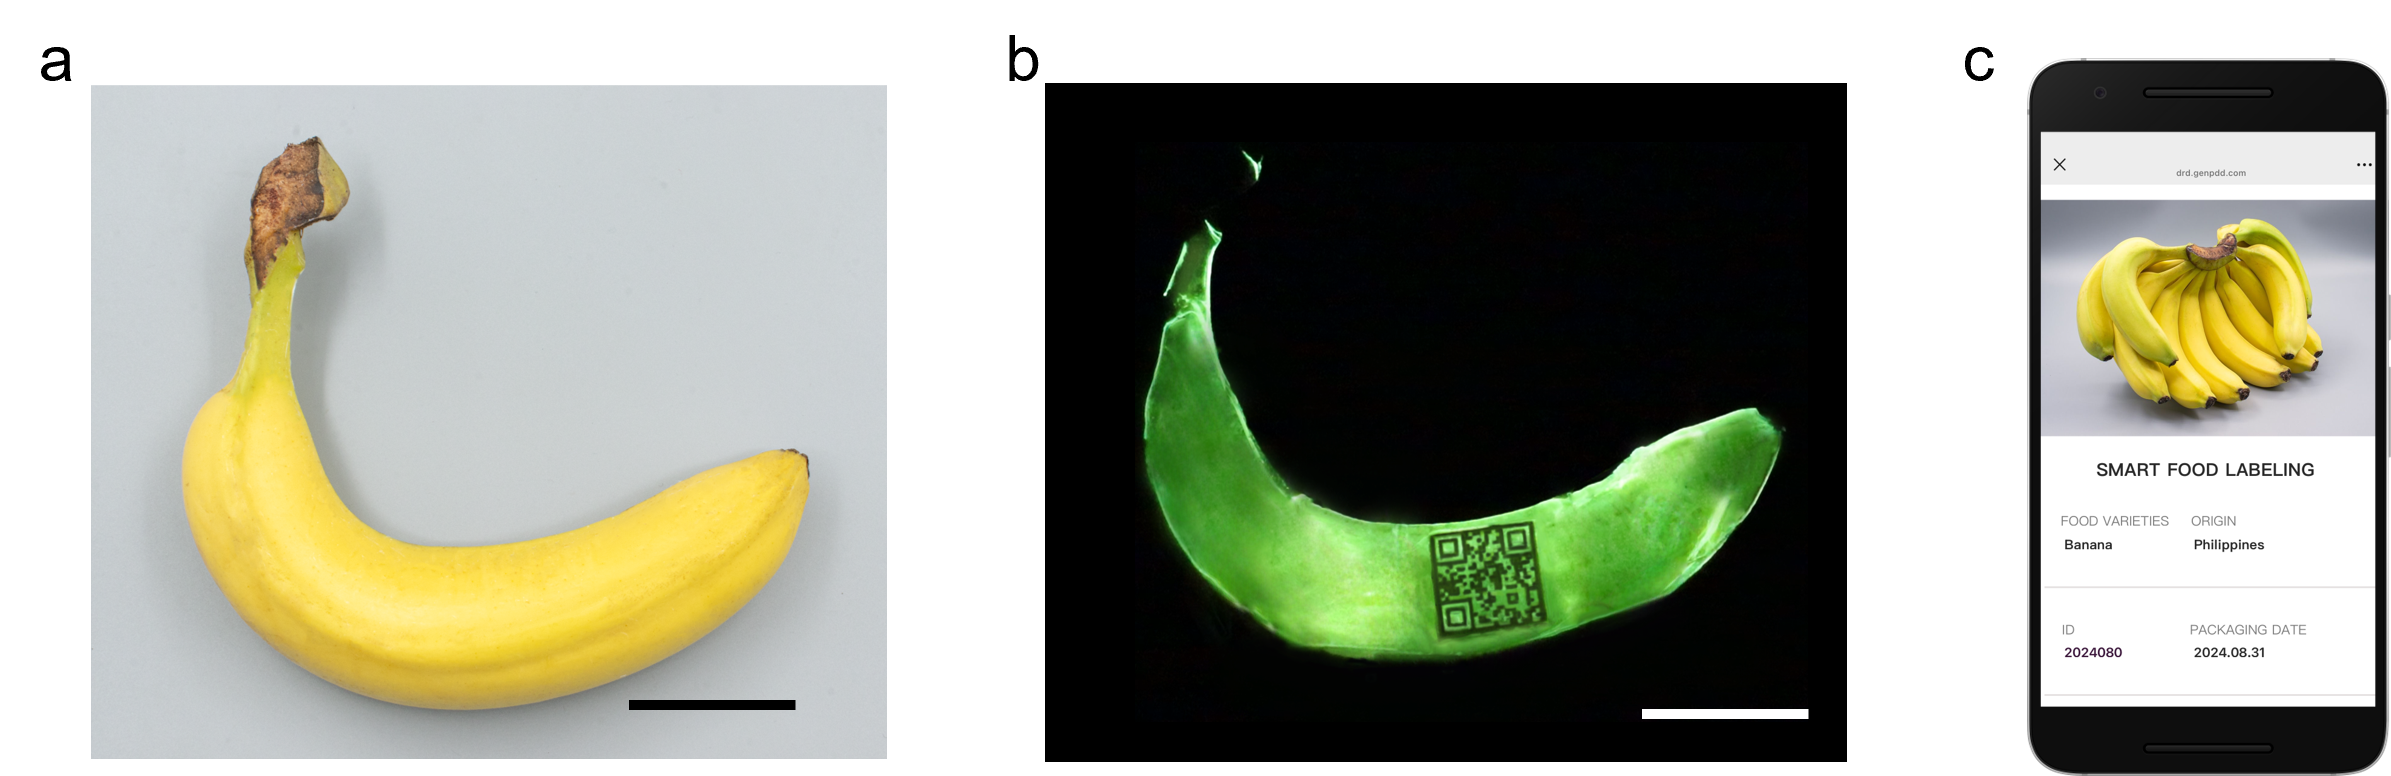
**

**Supplementary Fig. 17 | Anti-counterfeiting application of a patterned PPNF label onto a banana. a, b,** Photographs of a PPNF-coated banana under white-light illumination (a) and after switching off the UV light (b). Scale bars, 5 cm. **c,** Information obtained by scanning the PPNF QR code.


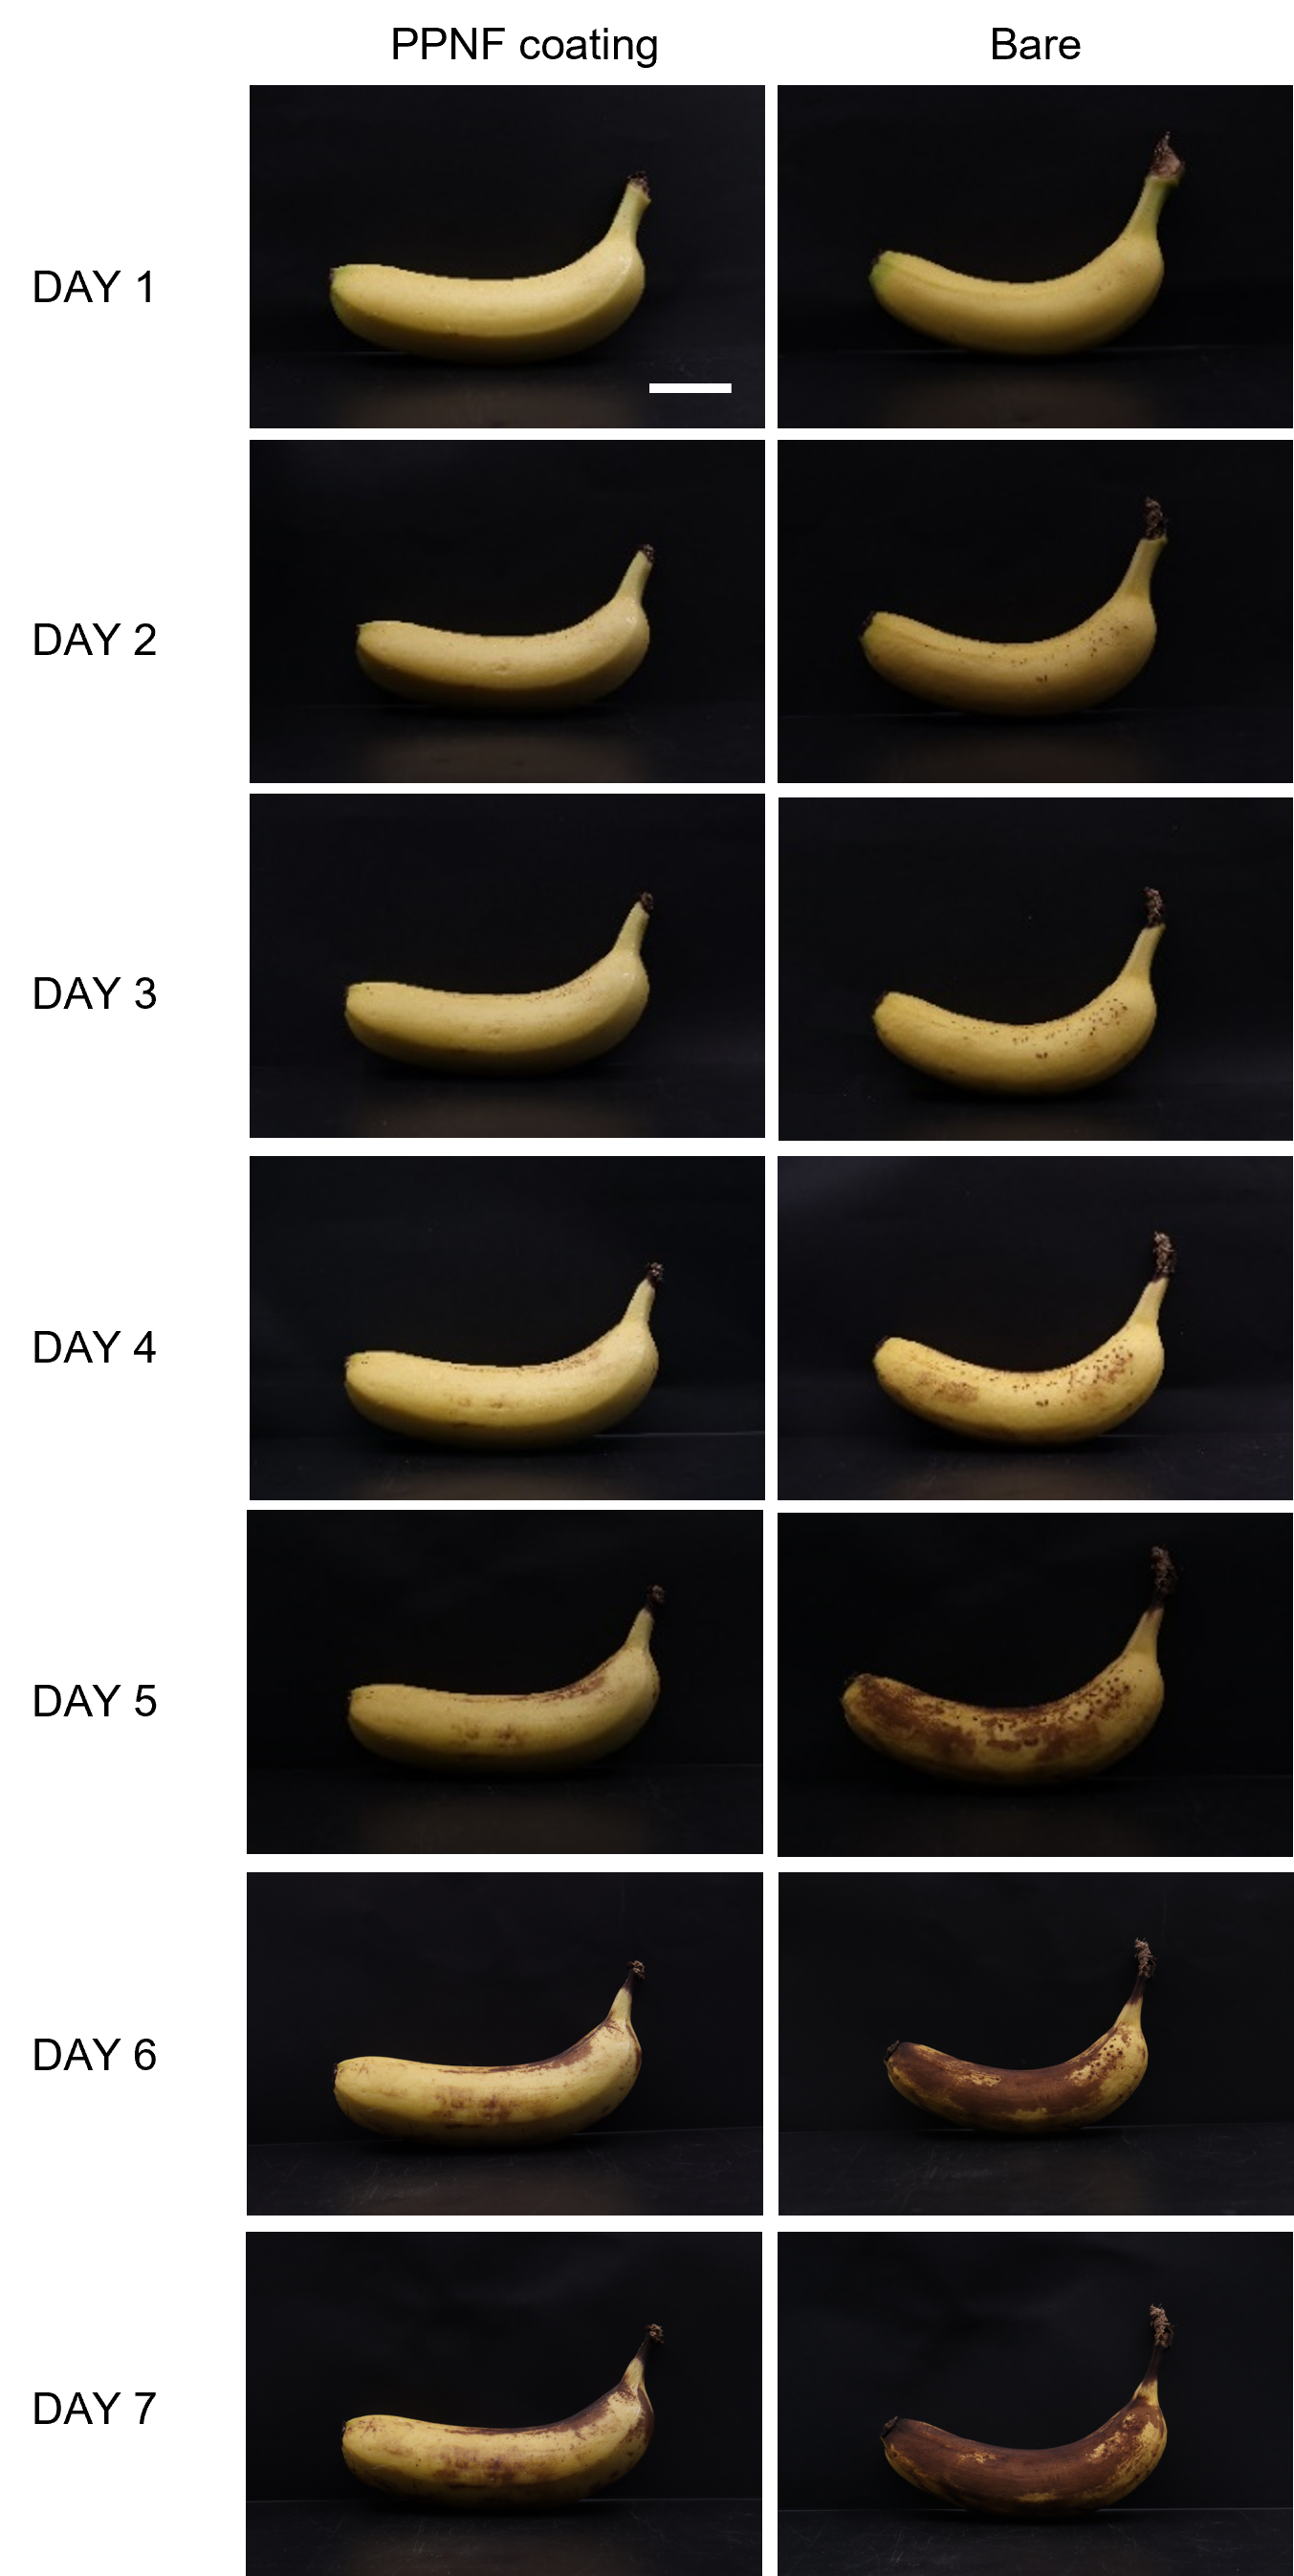


**Supplementary Fig. 18 |** Photographs of bare and PPNF-coated bananas at different storage times at 23 ℃ and 50 % RH. Scale bar: 5 cm. Compared with the untreated control, a PPNF-coated banana exhibited a smaller browning area, thereby extending the shelf life of the banana.

**
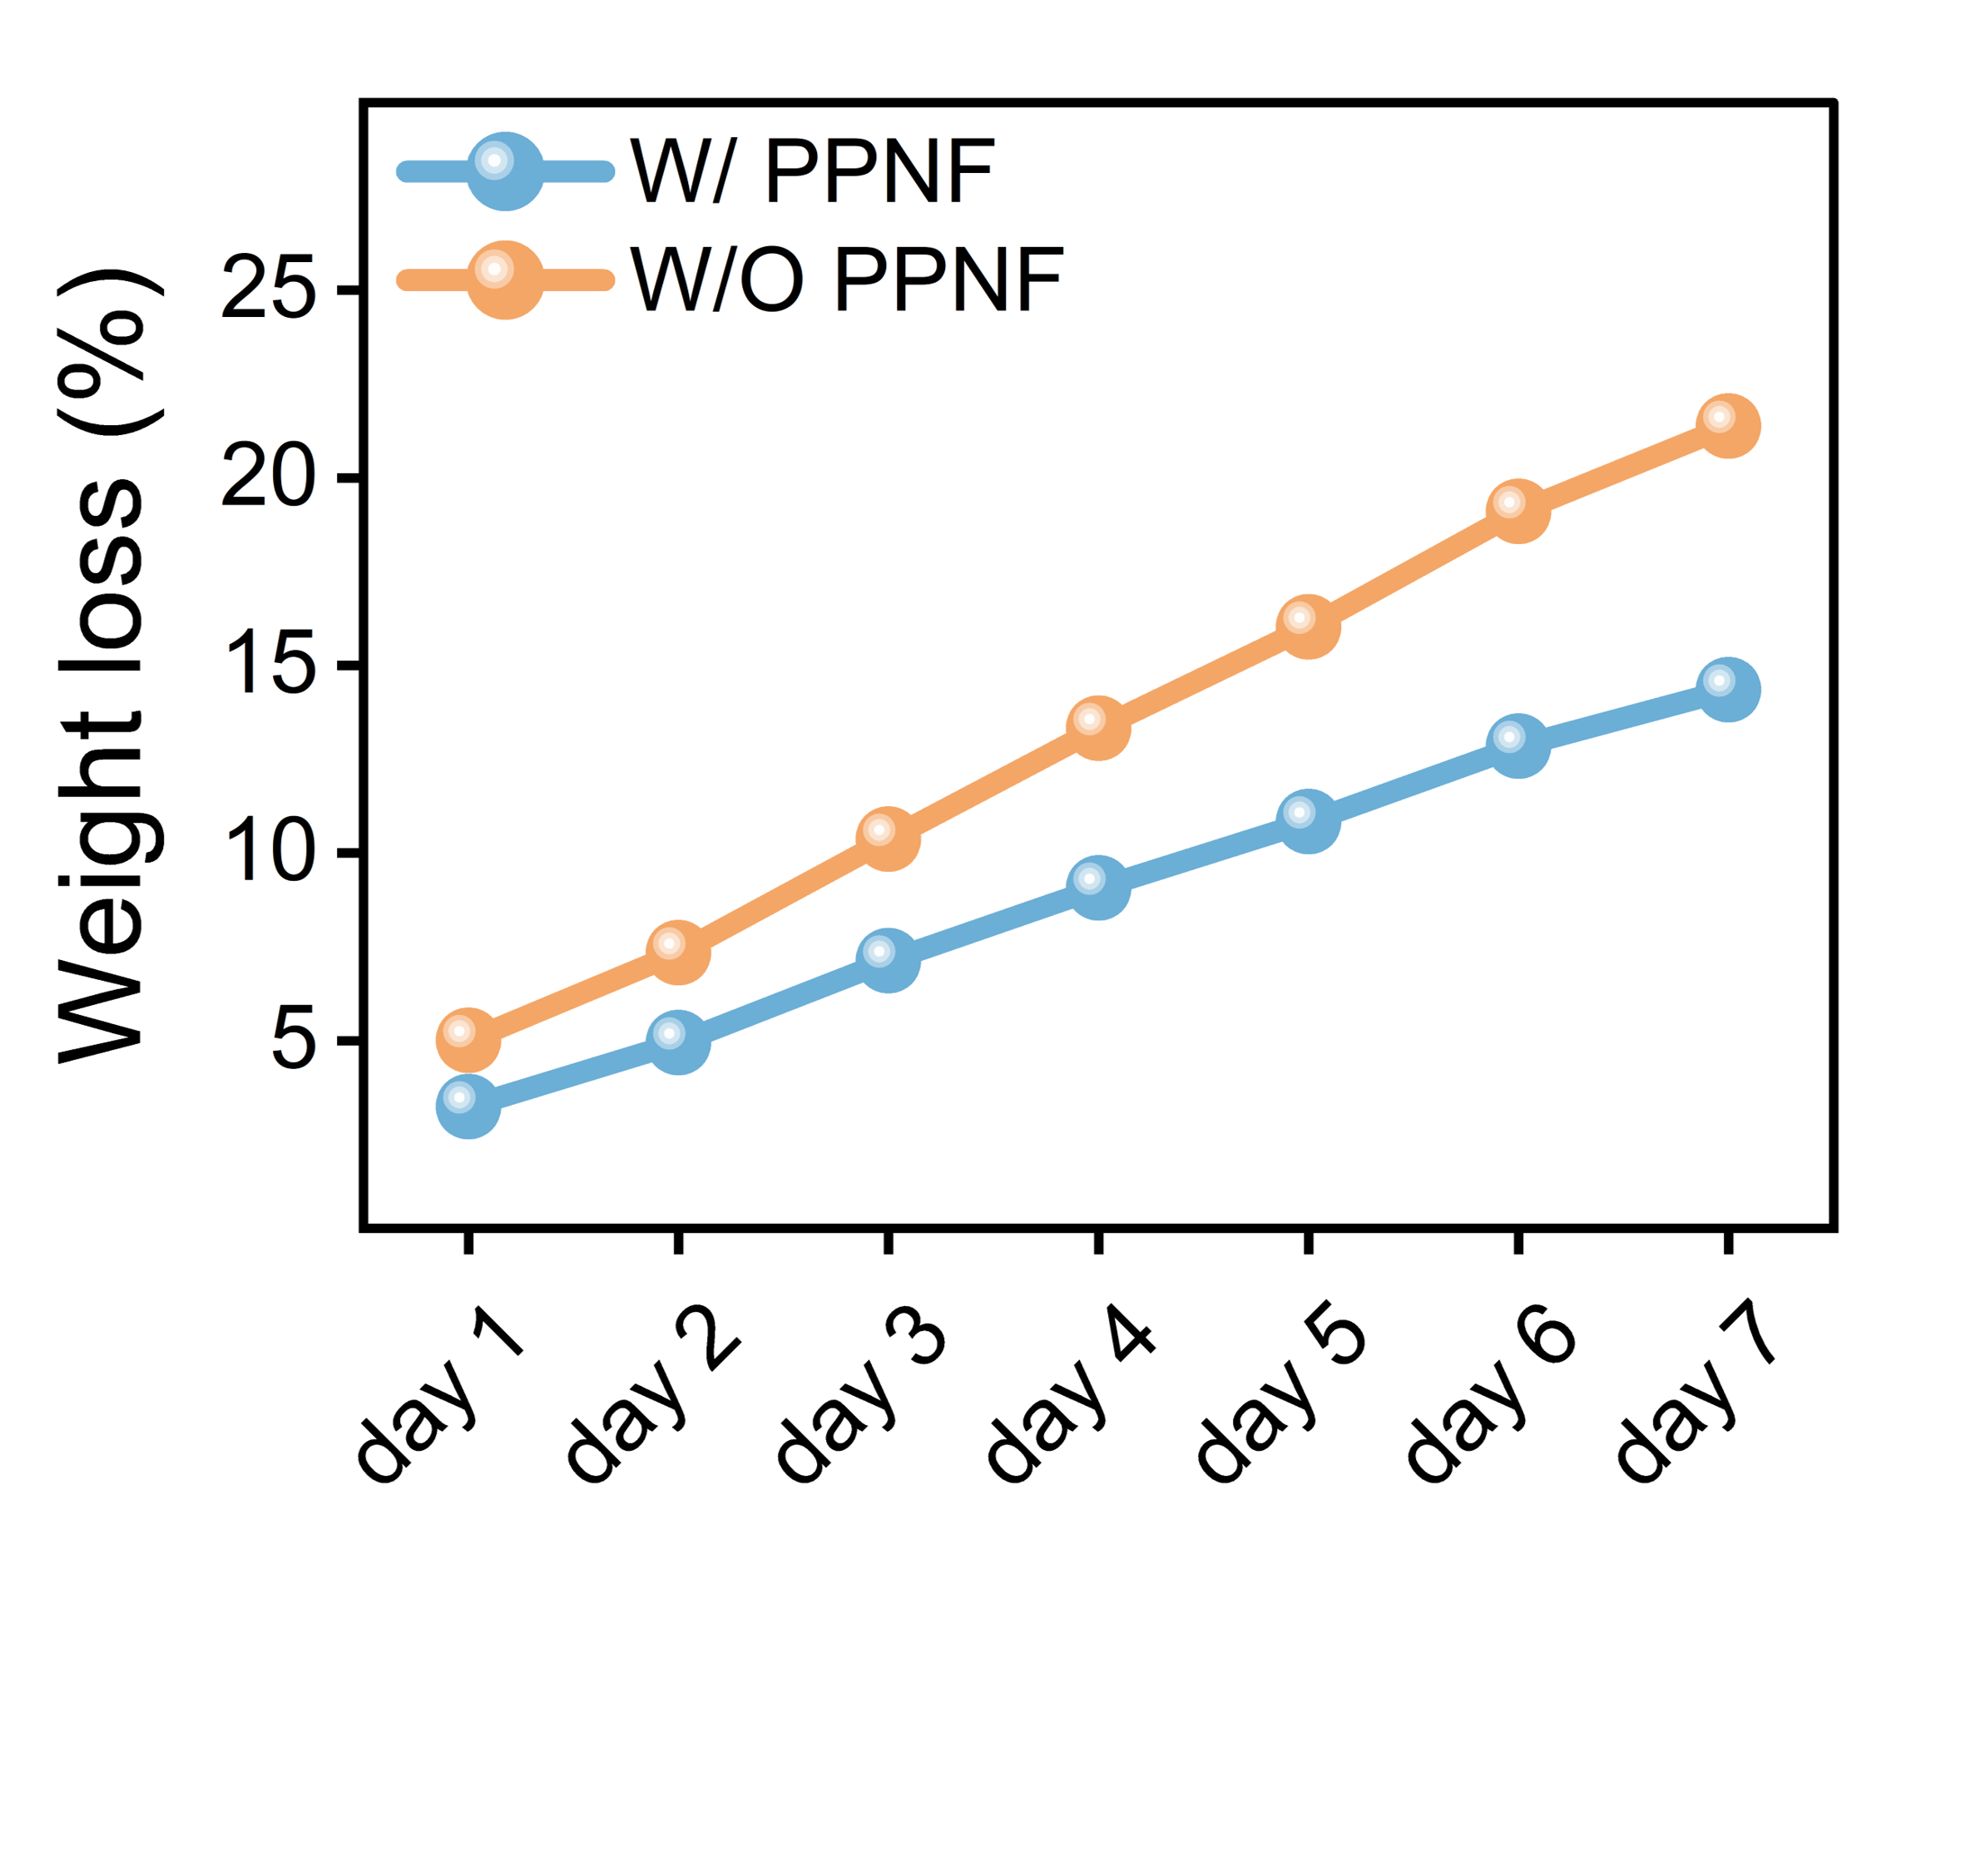
**

**Supplementary Fig. 19 |** Weight loss of bare and PPNF-coated bananas at different storage times at 23 ℃ and 50 % humidity. During the seven-day storage period, both PPNF-coated and uncoated banana exhibits an increase in weight loss rate. However, the weight loss of the PPNF-coated group is consistently and significantly lower than that of the untreated group. Specifically, the weight loss rate of uncoated banana increases substantially from 5.01% on day 1 to 21.38% on day 7, whereas that of the coated samples increases only moderately from 3.24% to 14.35% over the same period. Compared with the untreated group, the PPNF-coated group shows a 32.88% reduction in weight loss rate on day 7. These results indicate that PPNF forms a dense semipermeable barrier on the banana surface, which markedly slows down water evaporation and restricts gas exchange, thereby effectively suppressing substrate consumption driven by respiration and extending the shelf life of bananas.

**
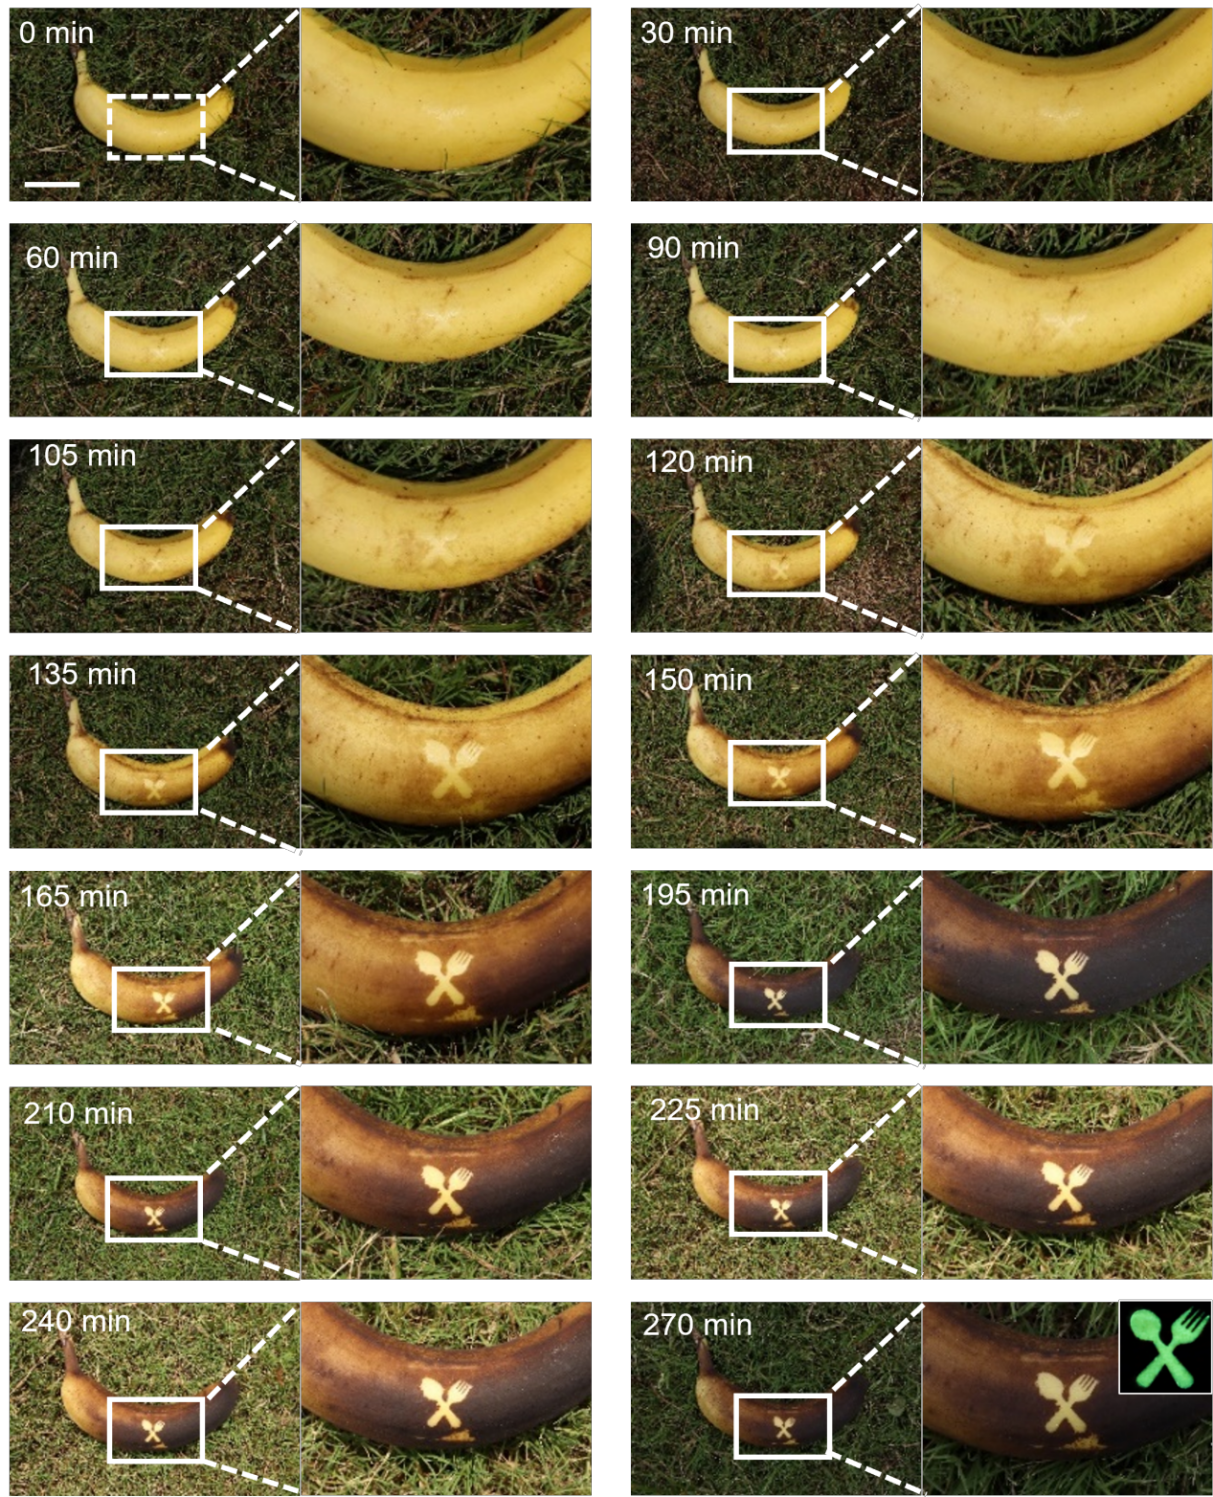
**

**Supplementary Fig. 20 |** Photographs of a patterned PPNF-coated banana stored under outdoor conditions (40 °C, 56% RH) for different durations. Inset: RTP image of PPNF adhesion on banana after cessation of UV illumination. Scale bar: 5 cm.

**
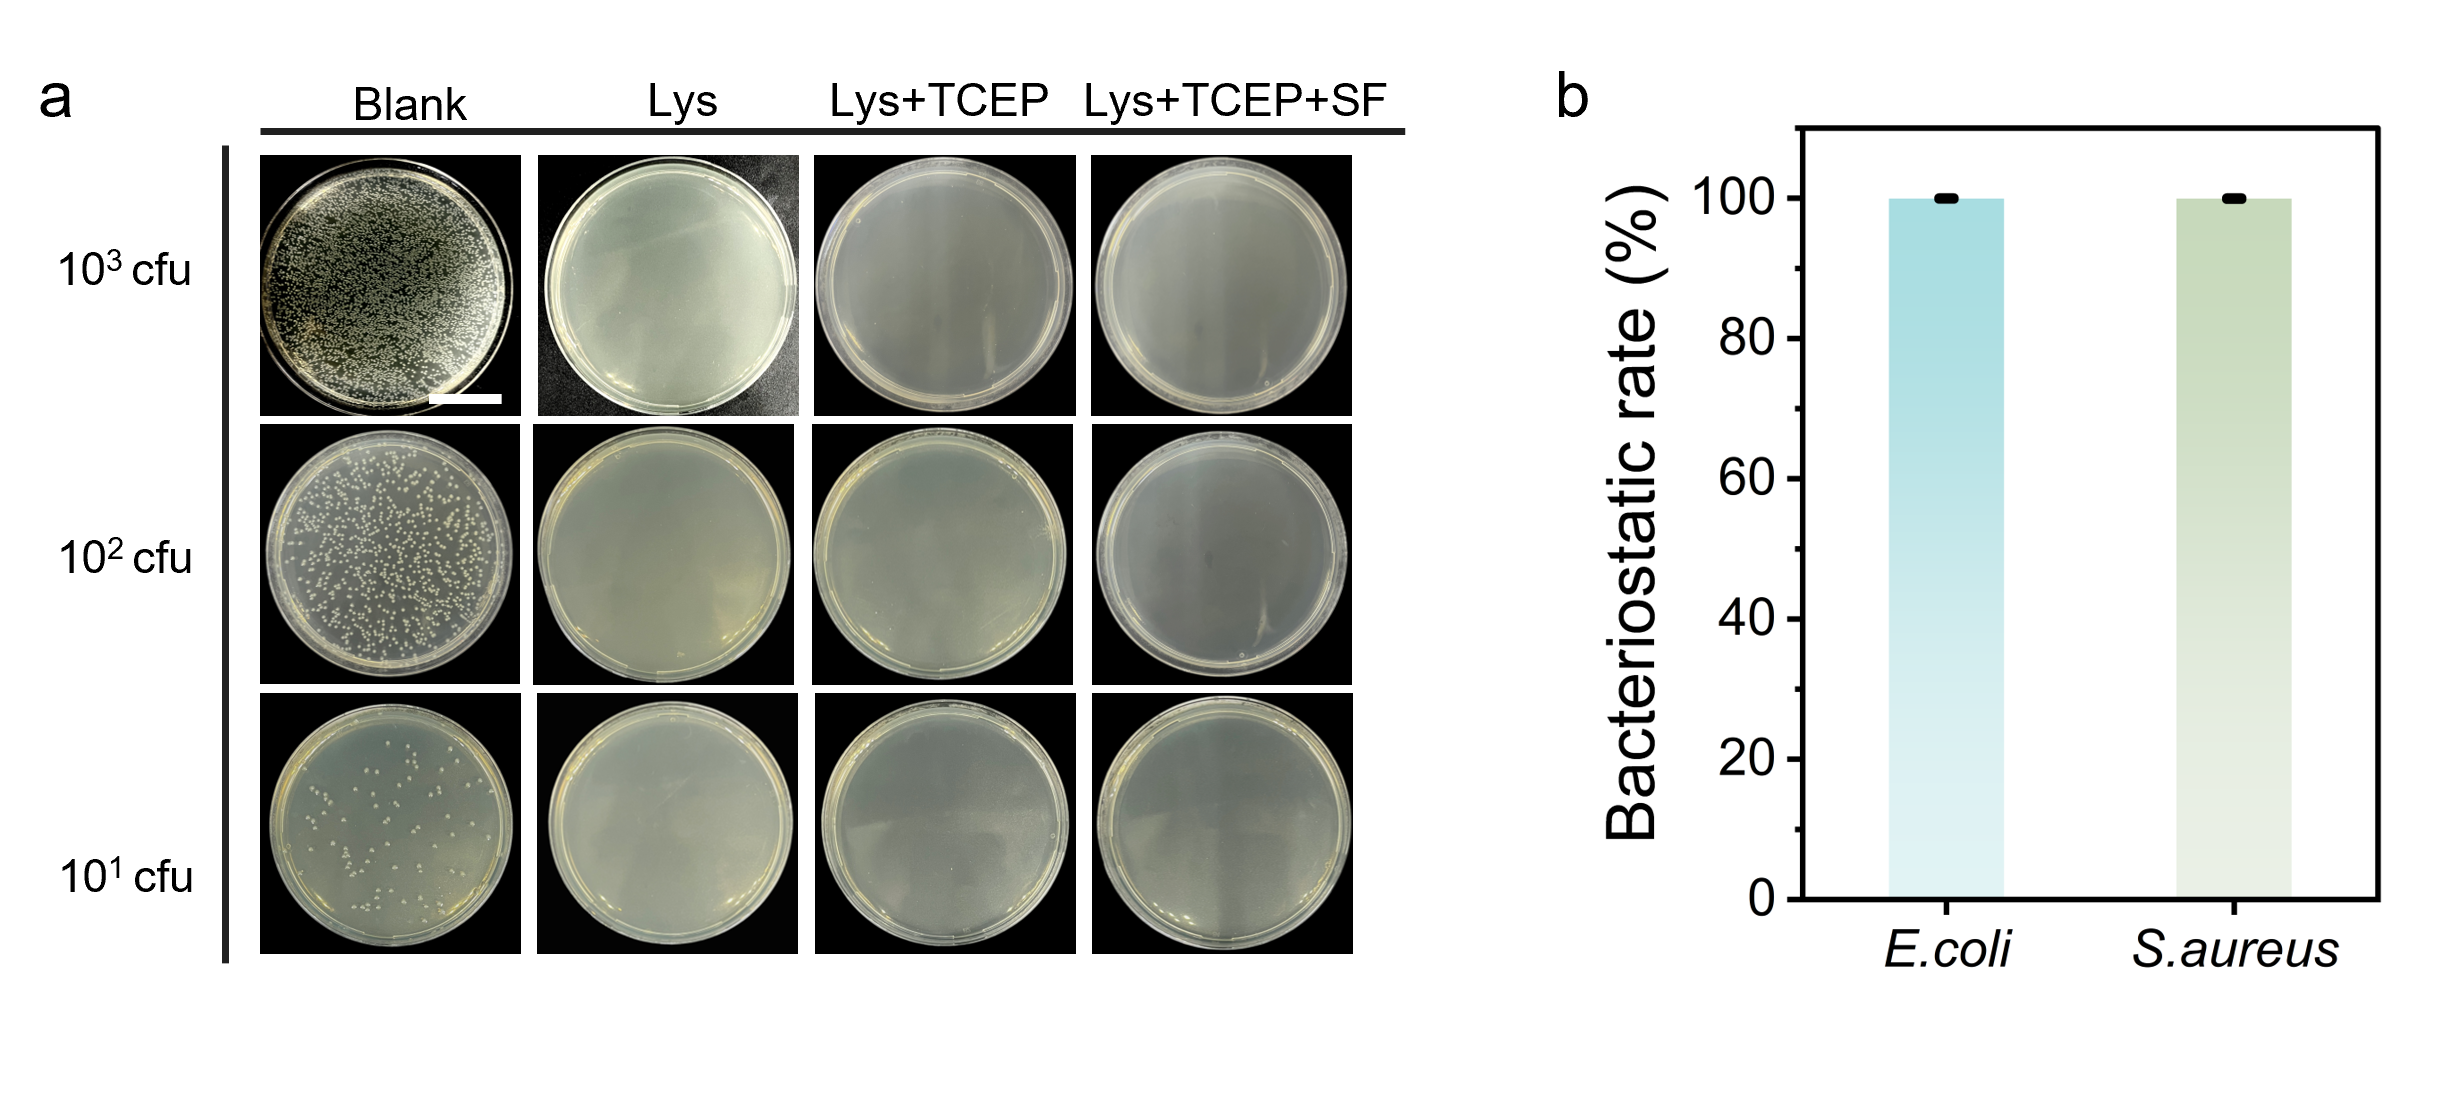
**

**Supplementary Fig. 21 | Antibacterial properties of PPNFs evaluated using the plate counting (spread plate) method.** **a,** Antibacterial activity of lysozyme solution, a mixture of lysozyme and TCEP, and a mixture of lysozyme, TCEP and SF against *E. coli*. **b**, Scale bar: 2 cm. b, Antibacterial rates of PPNFs against *E.coli*. and *S.aureus.* Data in (b) are presented as mean ± SD, n = 3.

**
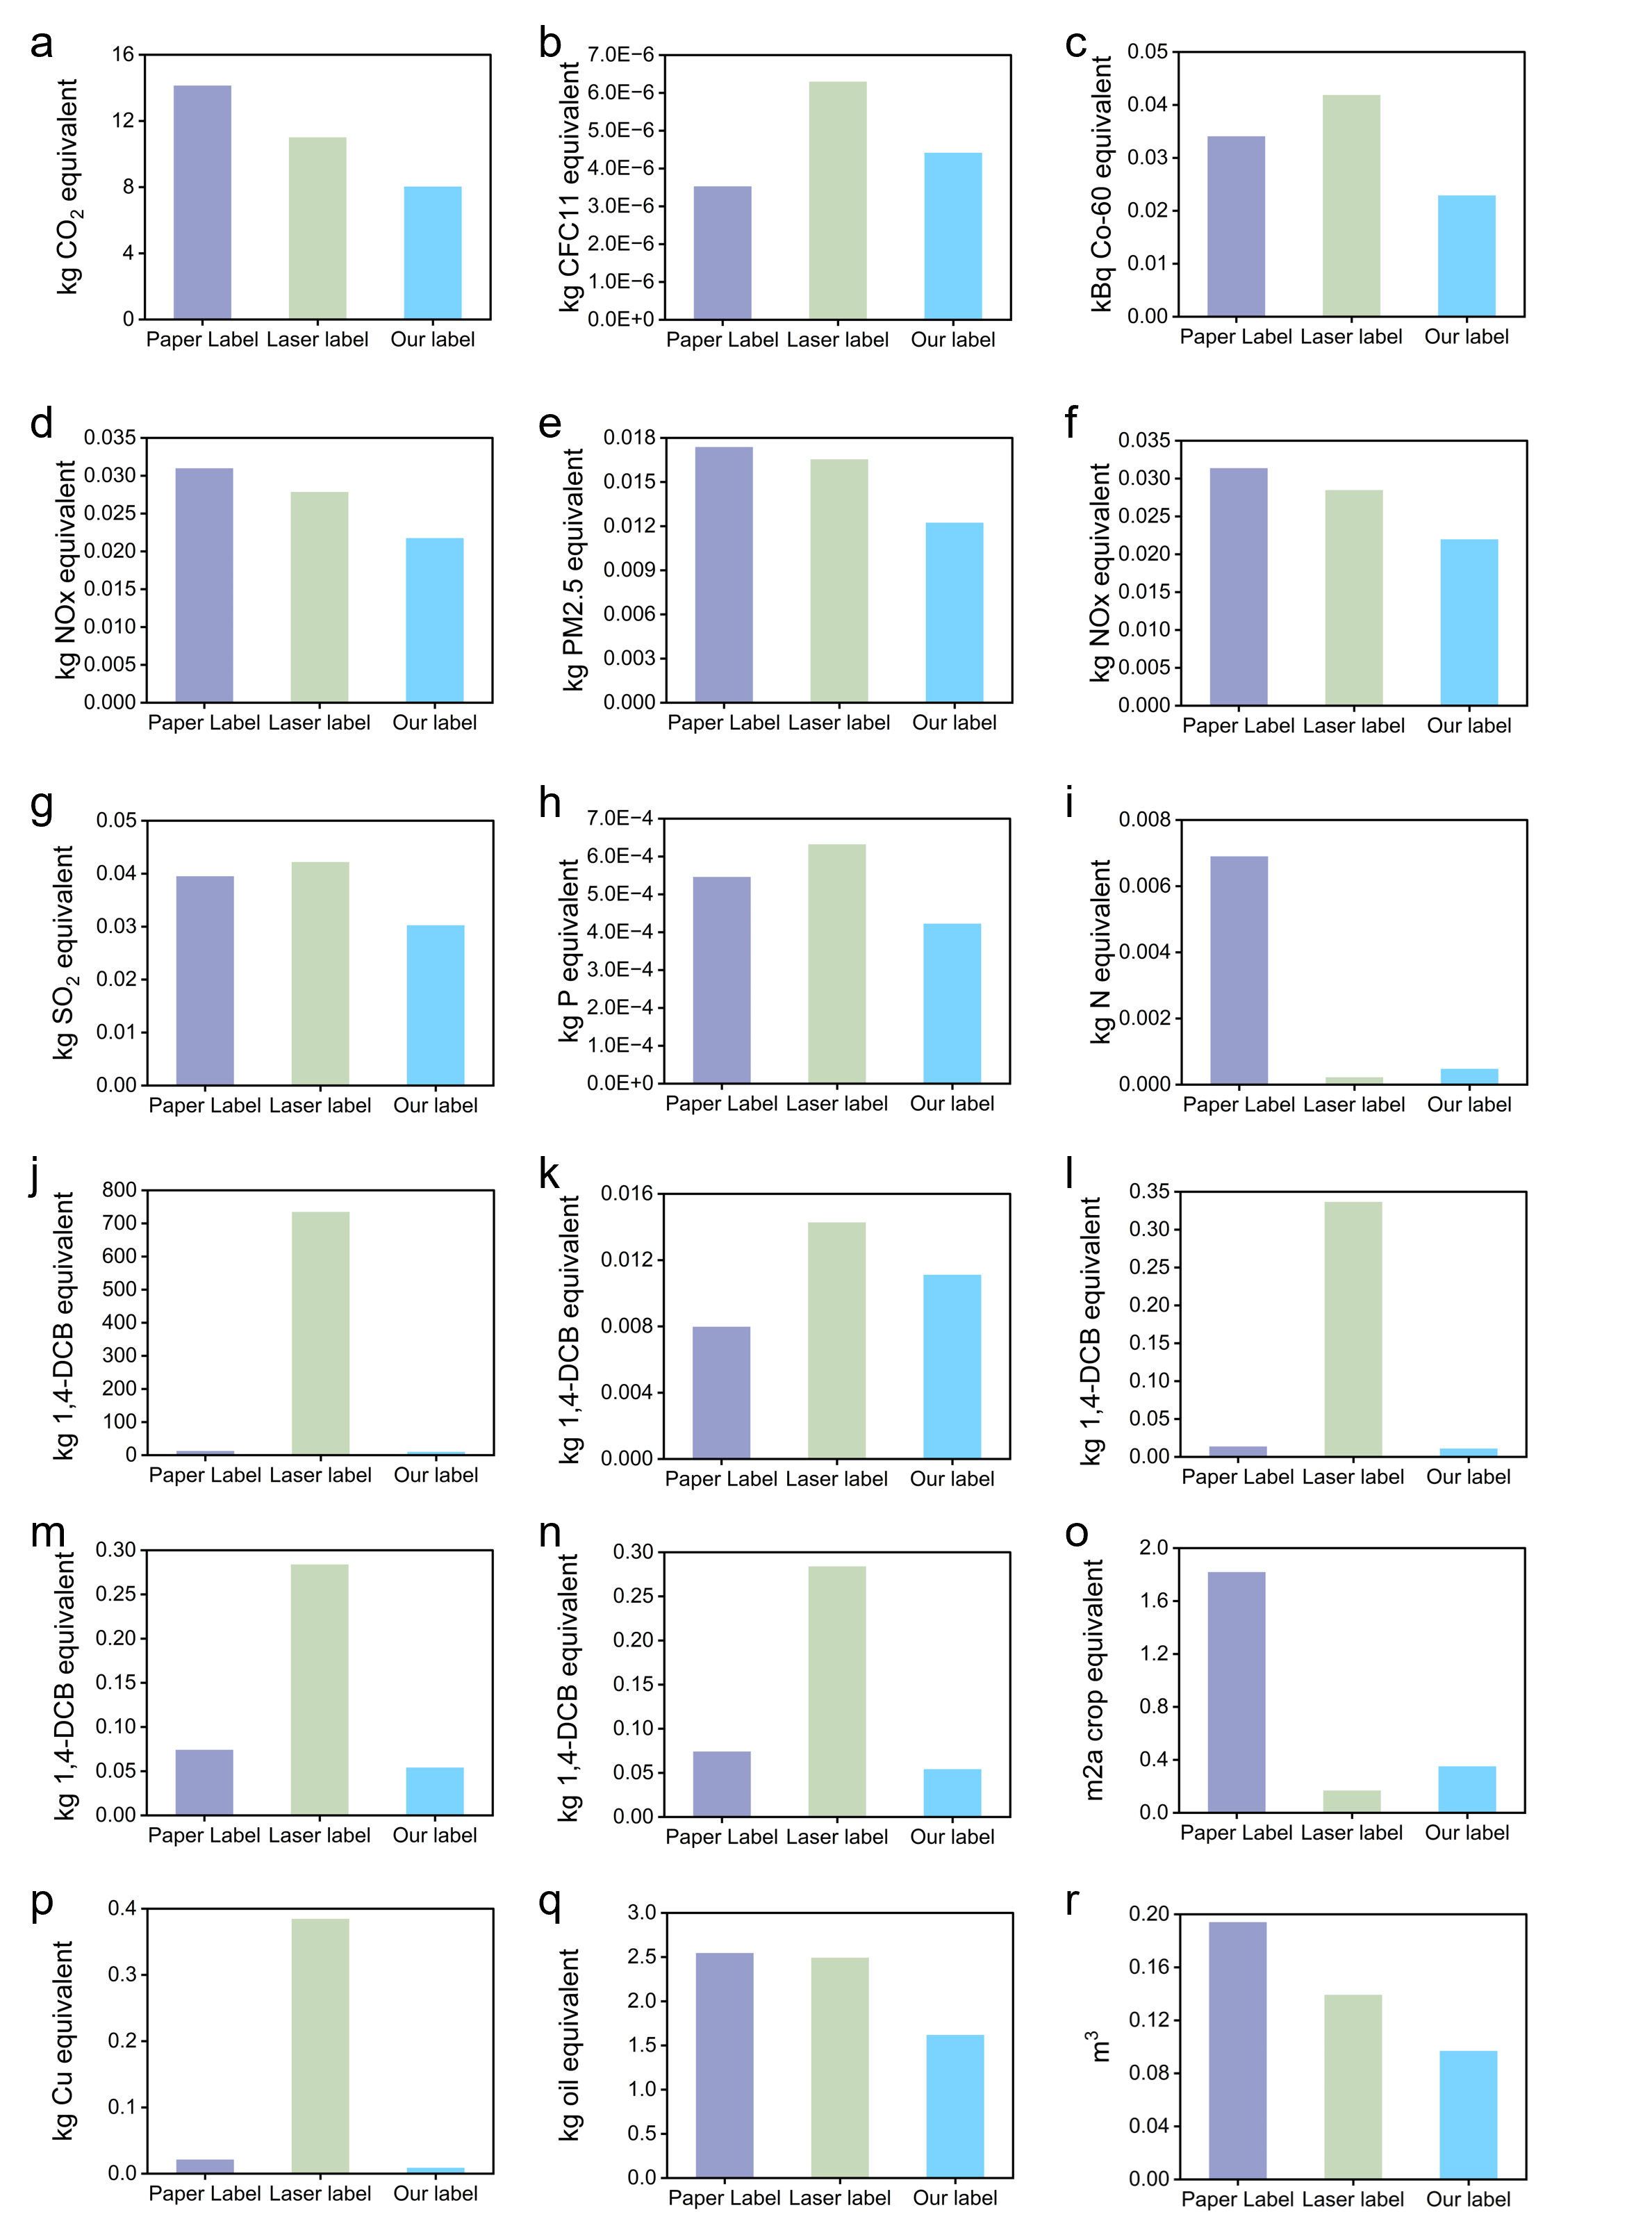
**

**Supplementary Fig. 22 | Life-cycle assessment of the PPNF label relative to conventional paper-based and holographic security labels. a,** Global warming. **b,** Stratospheric ozone depletion. **c,** Ionizing radiation. **d,** Ozone formation-human health. **e,** Fine particulate matter formation. **f,** Ozone formation-terrestrial ecosystems. **g,** Terrestrial acidification. **h,** Freshwater eutrophication. **i,** Marine eutrophication. **j,** Terrestrial ecotoxicity. **k,** Freshwater ecotoxicity. **l,** Marine ecotoxicity. **m,** Human carcinogenic toxicity. **n,** Human non-carcinogenic toxicity. **o,** Land use. **p,** Mineral resource scarcity. **q,** Fossil resource scarcity. **r,** Water consumption.

**
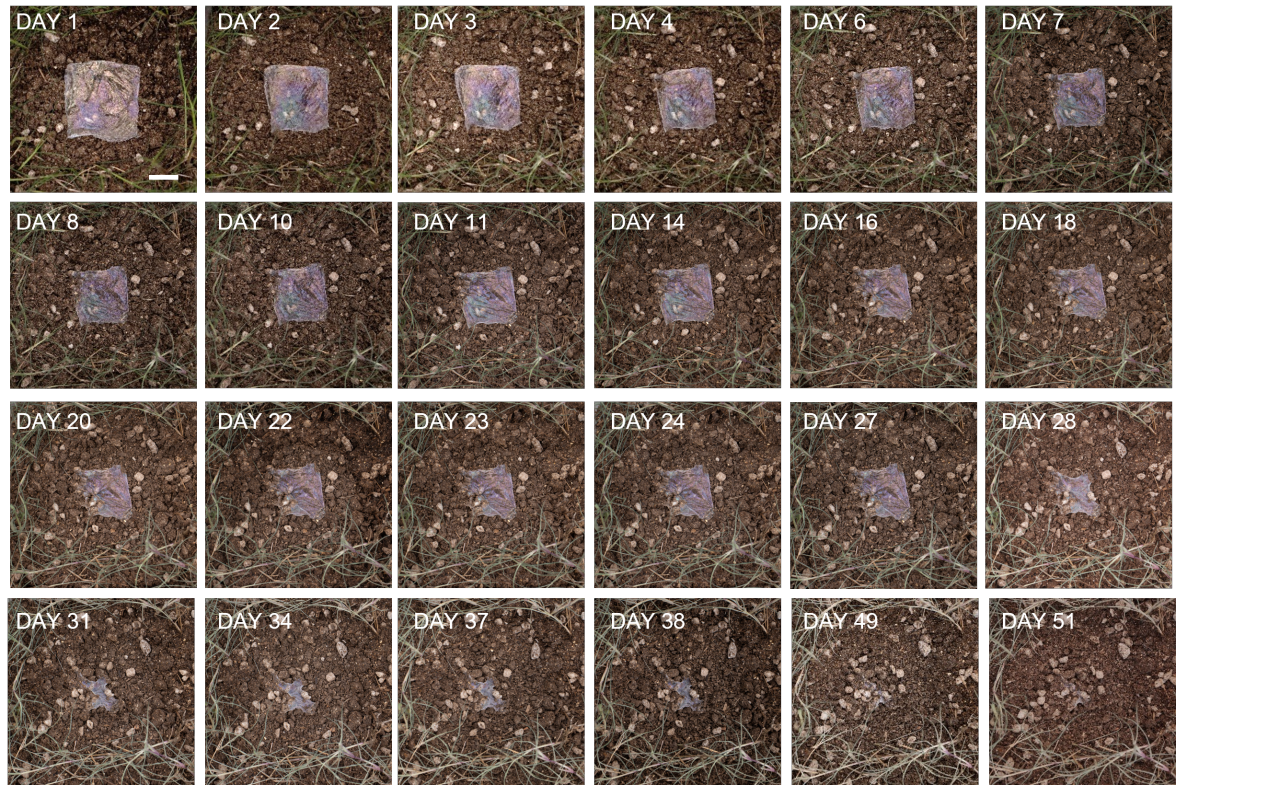
**

**Supplementary Fig. 23 |** Degradation behavior of the PPNF in a humid soil environment at room temperature. Scale bar, 2 cm.

**
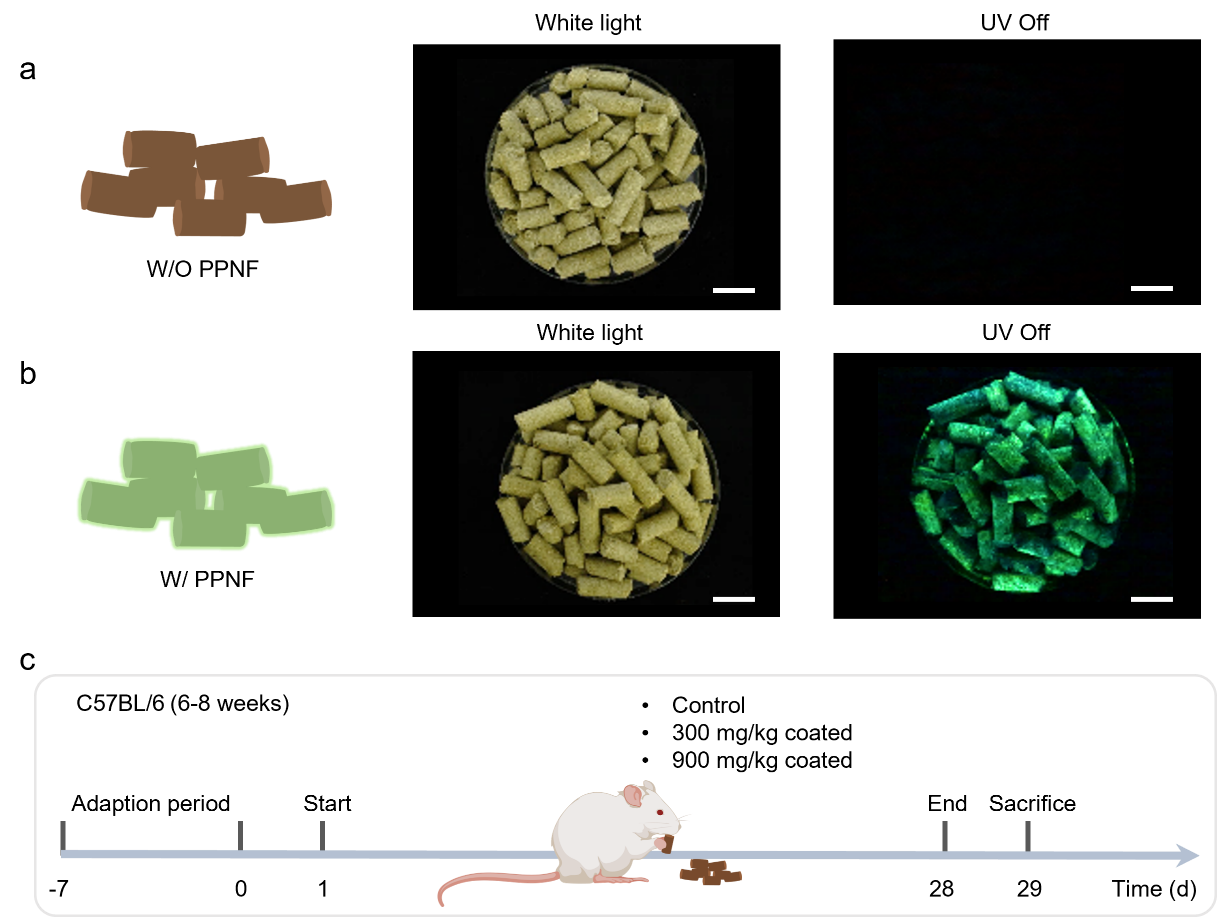
**

**Supplementary Fig. 24 | *In vivo* toxicity assay of PPNFs using PPNF-coated rat feed. a, b,** Schematics andphotographs of bare rat food (a) and PPNF-coated rat food (b) under different light conditions. **c,** Animal experimental design. C57BL/6 mice were fed with bare rat food (control), PPNF-coated rat food (300 mg/kg/day or 900 mg/kg/day) for 28 days (n= 5 biologically independent mice per group).

**Supplementary Tables**

**Table 1. Performance comparison of the PPNF bio-label with conventional non-PUF labels in terms of invisibility, conformality, adaptivity, biodegradability, and multifunctionality.**

| Category | Matrix | Invisibility  (Score) | Conformality  (Score) | Adaptivity  (Score) | Multifunctionality  (Score) | Biodegradability  (Score) | Ref |
| --- | --- | --- | --- | --- | --- | --- | --- |
| Biomass-based | Silk protein & lysozyme | Imperceptible and only be visualized under specific stimuli  **(5)** | *D* < 10-7 N·m  **(5)** | Adaptive  **(5)** | Anti-counterfeiting;  Sensing;  Antibacterial;  Preserving  **(5)** | Controlled bio-degradability (both in vivo and in soil)  **(5)** | This work |
| Biomass-based | Cellulose | Structural color  **(1)** | 10-6 ≤ *D* < 10-4 N·m  **(3)** | Nonadaptive  **(1)** | Anti-counterfeiting;  Sensing  **(2.5)** | Controlled bio-degradability (both in vivo and in soil)  **(5)** | [3] |
| Biomass-based | Cellulose | Structural color  **(1)** | 10-4 ≤ *D* < 10-3 N·m  **(2)** | Nonadaptive  **(1)** | Anti-counterfeiting  **(1.25)** | Biodegradation in soil;  Non-biodegradation in vivo  **(3)** | [4] |
| Biomass-based | Cellulose | Pale yellow under visible light  **(1)** | 10-4 ≤ *D* < 10-3 N·m  **(2)** | Nonadaptive  **(1)** | Anti-counterfeiting  **(1.25)** | Biodegradation in soil;  Non-biodegradation in vivo  **(3)** | [5] |
| Biomass-based | Cellulose | Structural color  **(1)** | *D* < 10-7 N·m  **(5)** | Not determined | Anti-counterfeiting;  Sensing  **(2.5)** | Biodegradation in soil;  Non-biodegradation in vivo  **(3)** | [6] |
| Biomass-based | Chitosan | Transparent but thick film  **(3)** | 10-3 ≤ *D* ≤ 100 N·m  **(1)** | Nonadaptive  **(1)** | Anti-counterfeiting;  Sensing  **(2.5)** | Biodegradation (both in vivo and soil）  **(4)** | [7] |
| Biomass-based | Silk protein | Transparent and only be visualized under specific stimuli  **(4)** | 10-6 ≤ *D* < 10-4 N·m  **(3)** | Nonadaptive  **(1)** | Anti-counterfeiting;  Display;  Sensing;  Filtration  **(5)** | Controlled bio-degradability (both in vivo and in soil)  **(5)** | [8] |
| Biomass-based | Silk protein | Structural color  **(1)** | 10-6 ≤ *D* < 10-4 N·m  **(3)** | Nonadaptive  **(1)** | Anti-counterfeiting;  Display  **(2.5)** | Controlled bio-degradability (both in vivo and in soil)  **(5)** | [9] |
| Biomass-based | Silk protein | Transparent but thick film  **(3)** | 10-6 ≤ *D* < 10-4 N·m  **(3)** | Nonadaptive  **(1)** | Anti-counterfeiting;  Encryption  **(2.5)** | Controlled bio-degradability (both in vivo and in soil)  **(5)** | [10] |
| Biomass-based | Silk protein/  cellulose nanocrystals (CNCs) | Structural color  **(1)** | 10-6 ≤ *D* < 10-4 N·m  **(3)** | Nonadaptive  **(1)** | Anti-counterfeiting;  Encryption  **(2.5)** | Controlled bio-degradability (both in vivo and in soil)  **(5)** | [11] |
| Polymer-based | Azopolymer | Structural color  **(1)** | 10-7 ≤ *D* < 10-6 N·m  **(4)** | Nonadaptive  **(1)** | Anti-counterfeiting;  Sensing  **(2.5)** | Poor biodegradability  **(1)** | [12] |
| Polymer-based | Polydimethylsiloxane  (PDMS) | Golden under visible light  **(1)** | 10-7 ≤ *D* < 10-6 N·m  **(4)** | Nonadaptive  **(1)** | Anti-counterfeiting;  Optical quantum communications  **(2.5)** | Poor biodegradability  **(1)** | [13] |
| Polymer-based | Polymethyl Methacrylate  (PMMA) | Transparent but thick film  **(3)** | 10-6 ≤ *D* < 10-4 N·m  **(3)** | Nonadaptive  **(1)** | Anti-counterfeiting;  Sensing  **(2.5)** | Poor biodegradability  **(1)** | [14] |
| Polymer-based | Polyvinyl alcohol  (PVA) | Transparent but thick film  **(3)** | 10-4 ≤ *D* < 10-3 N·m  **(2)** | Nonadaptive  **(1)** | Anti-counterfeiting;  Encryption  **(2.5)** | Biodegradation in soil;  Non-biodegradation in vivo  **(3)** | [15] |
| Polymer-based | Polyethylene terephthalate  (PET) | Structural color  **(1)** | 10-4 ≤ *D* < 10-3 N·m  **(2)** | Nonadaptive  **(1)** | Anti-counterfeiting;  Sensing  **(2.5)** | Poor biodegradability  **(1)** | [16] |
| Polymer-based | Di(ethylene glycol) ethyl ether acrylate (eDEGA) /  Ethylene glycol dimethacrylate (EGDMA) | Structural color  **(1)** | 10-6 ≤ *D* < 10-4 N·m  **(3)** | Nonadaptive  **(1)** | Anti-counterfeiting;  Sensing  **(2.5)** | Poor biodegradability  **(1)** | [17] |
| Polymer-based | Poly(1-vinylimidazole-co-methacrylic acid) [P(VI-co-MAAc)] | Transparent but thick film  **(3)** | 10-4 ≤ *D* < 10-3 N·m  **(2)** | Nonadaptive  **(1)** | Anti-counterfeiting;  Encryption  **(2.5)** | Poor biodegradability  **(1)** | [18] |
| Polymer-based | Acrylamide polymer  (PAM) | Structural color  **(1)** | 10-6 ≤ *D* < 10-4 N·m  **(3)** | Nonadaptive  **(1)** | Anti-counterfeiting;  Encryption  **(2.5)** | Poor biodegradability  **(1)** | [19] |
| Polymer-based | Polyacrylic acid polymer  (PAA) | Transparent but thick film  **(3)** | 10-7 ≤ *D* < 10-6 N·m  **(4)** | Nonadaptive  **(1)** | Anti-counterfeiting  **(1.25)** | Poor biodegradability  **(1)** | [20] |
| Polymer-based | 4′-(N-vinyl benzyl-4-pyridinyl)-2,2’:6’,2’’-terpyridine perchlorate (VPTP) /  acrylamide (AAm) | Transparent but thick film  **(3)** | 10-7 ≤ *D* < 10-6 N·m  **(4)** | Nonadaptive  **(1)** | Anti-counterfeiting  **(1.25)** | Poor biodegradability  **(1)** | [21] |
| Polymer-based | 2-methoxyethyl acrylate (MEA)/  Acrylic acid (AA) | Transparent but thick film  **(3)** | 10-3 ≤ *D* ≤ 100 N·m  **(1)** | Nonadaptive  **(1)** | Anti-counterfeiting;  Sensing  **(2.5)** | Poor biodegradability  **(1)** | [22] |
| Polymer-based | Polyacrylic acid (PAA) /  Acrylic acid (AA) /  N-succinimide ester (PAA-NHS) | Transparent but thick film  **(3)** | 10-3 ≤ *D* ≤ 100 N·m  **(1)** | Nonadaptive  **(1)** | Anti-counterfeiting  **(1.25)** | Poor biodegradability  **(1)** | [23] |
| Polymer-based | Poly(methyl acrylate-co-acrylic acid) (PMMA-co-MAA) | Structural colour  **(1)** | 10-4 ≤ *D* < 10-3 N·m  **(2)** | Nonadaptive  **(1)** | Anti-counterfeiting  **(1.25)** | Poor biodegradability  **(1)** | [24] |
| Polymer-based | Poly(ethylene terephthalate) (PET)/ allyl methacrylate (AMA)/ ethyl acrylate (EA)/ polystyrene(PS) | Structural colour  **(1)** | 10-6 ≤ *D* < 10-4 N·m  **(3)** | Nonadaptive  **(1)** | Anti-counterfeiting;  Encryption  **(2.5)** | Poor biodegradability  **(1)** | [25] |
| Polymer-based | Polyvinyl alcohol  (PVA) | Transparent but thick film  **(3)** | 10-4 ≤ *D* < 10-3 N·m  **(2)** | Nonadaptive  **(1)** | Anti-counterfeiting;  Sensing  **(2.5)** | Biodegradation in soil;  Non-biodegradation in vivo  **(3)** | [26] |
| Silicon-based | Indium Tin Oxide-coated glass substrate/ Cr/ Au | Golden under visible light  **(1)** | 10-3 ≤ *D* ≤ 100 N·m  **(1)** | Nonadaptive  **(1)** | Anti-counterfeiting;  Holography  **(2.5)** | Poor biodegradability  **(1)** | [27] |
| Silicon-based | Si substrate/ AgNWs | Silver-gray under visible light  **(1)** | 10-3 ≤ *D* ≤ 100 N·m  **(1)** | Nonadaptive  **(1)** | Anti-counterfeiting  **(1.25)** | Poor biodegradability  **(1)** | [28] |
| Silicon-based | Si substrate/ polystyrene nanosphere | Transparent but substrate-visible  **(3)** | 10-3 ≤ *D* ≤ 100 N·m  **(1)** | Nonadaptive  **(1)** | Anti-counterfeiting  **(1.25)** | Poor biodegradability  **(1)** | [29] |

Note: Detailed scoring criteria are provided in Supplementary Note 4.

**Table 2. Performance comparison of the PPNF bio-label with conventional optical PUF labels in terms of invisibility, conformality, adaptivity, biodegradability, and multifunctionality.**

| Category | Matrix | Invisibility  (Score) | Conformality  (Score) | Adaptivity  (Score) | Multifunctionality  (Score) | Biodegradability  (Score) | Ref |
| --- | --- | --- | --- | --- | --- | --- | --- |
| Biomass-based | Silk protein & lysozyme | Imperceptible and only be visualized under specific stimuli  **(5)** | *D* < 10-7 N·m  **(5)** | Adaptive  **(5)** | Anti-counterfeiting;  Sensing;  Antibacterial;  Preserving  **(5)** | Controlled bio-degradability (both in vivo and in soil)  **(5)** | This work |
| Biomass-based | Silk protein | White under visible light  **(1)** | 10-6 ≤ *D* < 10-4 N·m  **(3)** | Nonadaptive  **(1)** | Anti-counterfeiting  **(1.25)** | Controlled bio-degradability (both in vivo and in soil)  **(5)** | [30] |
| Biomass-based | Silk protein | Transparent but thick film  **(3)** | 10-3 ≤ *D* ≤ 100 N·m  **(1)** | Nonadaptive  **(1)** | Anti-counterfeiting  **(1.25)** | Controlled bio-degradability (both in vivo and in soil)  **(5)** | [31] |
| Biomass-based | Silk protein-based microlaser arrays | Yellow under visible light  **(1)** | 10-6 ≤ *D* < 10-4 N·m  **(3)** | Nonadaptive  **(1)** | Anti-counterfeiting  **(1.25)** | Controlled bio-degradability (both in vivo and in soil)  **(5)** | [32] |
| Biomass-based | Silk protein | Transparent but thick film  **(3)** | 10-6 ≤ *D* < 10-4 N·m  **(3)** | Nonadaptive  **(1)** | Anti-counterfeiting  **(1.25)** | Controlled bio-degradability (both in vivo and in soil)  **(5)** | [33] |
| Biomass-based | Cellulose nanocrystal (CNC)/ polyvinylpyrrolidone (PVP)/  glycerol | Structural color  **(1)** | 10-6 ≤ *D* < 10-4 N·m  **(3)** | Nonadaptive  **(1)** | Anti-counterfeiting  **(1.25)** | Partial biodegradability in soil  **(2)** | [34] |
| Biomass-based | DNA | Transparent but thick film  **(3)** | 10-6 ≤ *D* < 10-4 N·m  **(3)** | Nonadaptive  **(1)** | Anti-counterfeiting  **(1.25)** | Controlled bio-degradability (both in vivo and in soil)  **(5)** | [35] |
| Biomass-based | Gelatin/ corn starch | Pink under visible light  **(1)** | 10-3 ≤ *D* ≤ 100 N·m  **(1)** | Nonadaptive  **(1)** | Anti-counterfeiting  **(1.25)** | Controlled bio-degradability (both in vivo and in soil)  **(5)** | [36] |
| Polymer-based | Polydimethylsiloxane (PDMS)/  sodium acetate | Transparent but thick film  **(3)** | 10-3 ≤ *D* ≤ 100 N·m  **(1)** | Nonadaptive  **(1)** | Anti-counterfeiting  **(1.25)** | Poor biodegradability  **(1)** | [37] |
| Polymer-based | Poly(methyl methacrylate) (PMMA)/ polystyrene (PS)/  Thermoplastic Polyurethane）(TPU) | Transparent but thick film  **(3)** | 10-6 ≤ *D* < 10-4 N·m  **(3)** | Nonadaptive  **(1)** | Anti-counterfeiting;  Sensing  **(2.5)** | Poor biodegradability  **(1)** | [38] |
| Polymer-based | Polydimethylsiloxane (PDMS)/ liquid crystals | Red under visible light  **(1)** | 10-7 ≤ *D* < 10-6 N·m  **(4)** | Nonadaptive  **(1)** | Anti-counterfeiting  **(1.25)** | Poor biodegradability  **(1)** | [39] |
| Polymer-based | Latex substrate/ graphene oxide | Black under visible light  **(1)** | 10-6 ≤ *D* < 10-4 N·m  **(3)** | Nonadaptive  **(1)** | Anti-counterfeiting  **(1.25)** | Poor biodegradability  **(1)** | [40] |
| Polymer-based | Block copolymers (PS-b-PMMA)/  Au nanopatterns | Grey under visible light  **(1)** | *D* < 10-7 N·m  **(5)** | Nonadaptive  **(1)** | Anti-counterfeiting  **(1.25)** | Poor biodegradability  **(1)** | [41] |
| Polymer-based | Polyethylene terephthalate (PET)/  Polydimethylsiloxane (PDMS)/  Polyvinyl alcohol (PVA) | Transparent but thick film  **(3)** | 10-4 ≤ *D* < 10-3 N·m  **(2)** | Nonadaptive  **(1)** | Anti-counterfeiting  **(1.25)** | Poor biodegradability  **(1)** | [42] |
| Polymer-based | Polydimethylsiloxane (PDMS)/  copolymer containing pyridine(P4VP-nBA-S)/  hydroxyl distyrylpyridine | Transparent but thick film  **(3)** | 10-7 ≤ *D* < 10-6 N·m  **(4)** | Nonadaptive  **(1)** | Anti-counterfeiting;  Sensing  **(2.5)** | Poor biodegradability  **(1)** | [43] |
| Polymer-based | Polydimethylsiloxane (PDMS)/ carbon dots (CDs) | Transparent but thick film  **(3)** | 10-4 ≤ *D* < 10-3 N·m  **(2)** | Nonadaptive  **(1)** | Anti-counterfeiting  **(1.25)** | Poor biodegradability  **(1)** | [44] |
| Polymer-based | Polydimethylsiloxane (PDMS)/ microdiamonds | Transparent but thick film  **(3)** | 10-7 ≤ *D* < 10-6 N·m  **(4)** | Nonadaptive  **(1)** | Anti-counterfeiting  **(1.25)** | Poor biodegradability  **(1)** | [45] |
| Silicon-based | Si substrate/ nanodiamonds (NDs) | Transparent but substrate-visible  **(3)** | 10-3 ≤ *D* ≤ 100 N·m  **(1)** | Nonadaptive  **(1)** | Anti-counterfeiting  **(1.25)** | Poor biodegradability  **(1)** | [46] |
| Silicon-based | Si substrate/ polystyrene nanoparticles | Structural color  **(1)** | 10-3 ≤ *D* ≤ 100 N·m  **(1)** | Nonadaptive  **(1)** | Anti-counterfeiting  **(1.25)** | Poor biodegradability  **(1)** | [47] |
| Silicon-based | Si/SiO₂ substrate/ Au film | Golden under visible light  **(1)** | 10-3 ≤ *D* ≤ 100 N·m  **(1)** | Nonadaptive  **(1)** | Anti-counterfeiting  **(1.25)** | Poor biodegradability  **(1)** | [48] |
| Silicon-based | Si/SiO₂ substrate/  silver@silica nanoparticles (Ag@ SiO2 NPs) | Transparent but substrate-visible  **(3)** | 10-3 ≤ *D* ≤ 100 N·m  **(1)** | Nonadaptive  **(1)** | Anti-counterfeiting  **(1.25)** | Poor biodegradability  **(1)** | [49] |
| Silicon-based | SiO₂ substrate/ Au nanoparticles | Transparent but substrate-visible  **(3)** | 10-3 ≤ *D* ≤ 100 N·m  **(1)** | Nonadaptive  **(1)** | Anti-counterfeiting  **(1.25)** | Poor biodegradability  **(1)** | [50] |
| Silicon-based | Indium-tin-oxide (ITO)-coated glasses/  Poly(methyl methacrylate) (PMMA)/  polyvinylpyrrolidone (PVP)/  core-shell quantum dots | Transparent but substrate-visible  **(3)** | 10-3 ≤ *D* ≤ 100 N·m  **(1)** | Nonadaptive  **(1)** | Anti-counterfeiting  **(1.25)** | Poor biodegradability  **(1)** | [51] |
| Silicon-based | Silicon Wafer Substrates/ colloidal polystyrene (PS-COOH) nanospheres | Structural color  **(1)** | 10-3 ≤ *D* ≤ 100 N·m  **(1)** | Nonadaptive  **(1)** | Anti-counterfeiting  **(1.25)** | Poor biodegradability  **(1)** | [52] |
| Silicon-based | Si/SiO₂ substrate/  α-hydroxy ω-Br polystyrene-stat-polymethyl methacrylate (PS-stat-PMMA) random copolymer | Transparent but substrate-visible  **(3)** | 10-3 ≤ *D* ≤ 100 N·m  **(1)** | Nonadaptive  **(1)** | Anti-counterfeiting  **(1.25)** | Poor biodegradability  **(1)** | [53] |
| Silicon-based | Glass substrate/ carbon dots (CDs) | Transparent but substrate-visible  **(3)** | 10-3 ≤ *D* ≤ 100 N·m  **(1)** | Nonadaptive  **(1)** | Anti-counterfeiting  **(1.25)** | Poor biodegradability  **(1)** | [54] |
| Silicon-based | Glass substrate/ chiral liquid crystal | Transparent but substrate-visible  **(3)** | 10-3 ≤ *D* ≤ 100 N·m  **(1)** | Nonadaptive  **(1)** | Anti-counterfeiting  **(1.25)** | Poor biodegradability  **(1)** | [55] |
| Silicon-based | Si substrate/ SiN | Yellow under visible light  **(1)** | 10-3 ≤ *D* ≤ 100 N·m  **(1)** | Nonadaptive  **(1)** | Anti-counterfeiting  **(1.25)** | Poor biodegradability  **(1)** | [56] |
| Silicon-based | Si substrate | Structural color  **(1)** | 10-3 ≤ *D* ≤ 100 N·m  **(1)** | Nonadaptive  **(1)** | Anti-counterfeiting  **(1.25)** | Poor biodegradability  **(1)** | [57] |
| Silicon-based | Glass substrate/ polystyrene (PS)/  hematite | Reddish-brown under visible light  **(1)** | 10-3 ≤ *D* ≤ 100 N·m  **(1)** | Nonadaptive  **(1)** | Anti-counterfeiting  **(1.25)** | Poor biodegradability  **(1)** | [58] |
| Silicon-based | Glass substrate/ Au | Transparent but substrate-visible  **(3)** | 10-3 ≤ *D* ≤ 100 N·m  **(1)** | Nonadaptive  **(1)** | Anti-counterfeiting  **(1.25)** | Poor biodegradability  **(1)** | [59] |

Note: Detailed scoring criteria are provided in Supplementary Note 4.

**Supplementary Note 1**

**Mechanical derivation of PPNF conformality on petal surfaces**

Assuming that the microscopic morphology of the petal surface is of sinusoidal form 60:

(6)

Where y(x) is the petal roughness, is the amplitude, and is the wavelength. We consider the contact state between PPNF and petals as either “non-conformal contact” or “conformal contact”. In the case of “non-conformal contact”, the contact area is almost zero, resulting in zero total energy at the interface as depicted in Figure S12A. When the PPNF is conformably attached to microrelieves of the petal (Figure S12B), both the petal and the PPNF have a displacement in the vertical direction due to their elastic properties. The displacement of PPNF *w*(x) and the petal *uz*(x)can be described as

(7)

(8)

where *t* represents the maximum deflection of PPNF. Here, the conformal contact can be determined by considering the total energy associated with interfacial contact () as:

(9)

Where , , and are the bending energy of PPNF, the elastic energy of the petal, and the adhesion energy of the contact, respectively.

The bending energy of PPNF is calculated following:

(10)

The elastic energy of petal can be calculated by:

(11)

Since the normal stress on the top surface is discribed by:

(12)

Then

(13)

The interfacial energy between the PPNF and petal is:

(14)

Given that the maximum vertical deflection of PPNF *t* can be obtained when the total energy reaches the minimum, which should be the final state of the system after long time silence, *t* can be confirmed as . For totally conformable PPNF, the following relation should be fulfilled:

(15)

Which can be simplified as

(16)

Where 𝛾, , *D* denote the actual adhesion energy per united area, the plane-strain modulus of the petal, and the bending stiffness of the PPNF. For a thin elastic film:

(17)

where *E*, *t*, and *v* denote the Young’s modulus, thickness, and Poisson’s ratio, respectively.

For the petal conditions with , , , the critical membrane thickness is ~548 nm (Fig. 3e).

**Supplementary Note 2**

**Derivation of the critical adhesion energy for conformal contact on cylindrical and spherical substrates**

**(1) cylindrical substrates**

To investigate the conformal contact behavior of the PPNF on cylindrical surfaces, the system was simplified as a thin film with bending stiffness *D*, thickness *t*, width *b*, and length 2*L*, which bends to conformally wrap around a cylindrical substrate with radius *R* (Fig. 3f)61. The total energy of the system consists of two main contributions:

(18)

Where is the surface adhesion energy, i.e., the energy released upon contact between the PPNF and the surface, which depends on the adhesion energy per unit area *γ* and the contact area:

(19)

is the bending elastic strain energy. When the PPNF bends around a cylinder of radius *R*, its curvature is . According to beam theory, the bending energy per unit length is given by:

(20)

For a film of length 2*L*, the total bending energy is:

(21)

For the wrapped state to be energetically favorable (i.e., to achieve spontaneous conformal contact), the adhesion energy released by the system must be greater than or equal to the elastic strain energy required to bend the film. In other words, the adhesion energy must be sufficient to overcome the resistance from bending stiffness, thereby enabling stable conformal adhesion:

(22)

(23)

When the system is at the critical state of conformal contact,. At this point, the corresponding adhesion energy is the minimum critical adhesion energy :

(24)

**
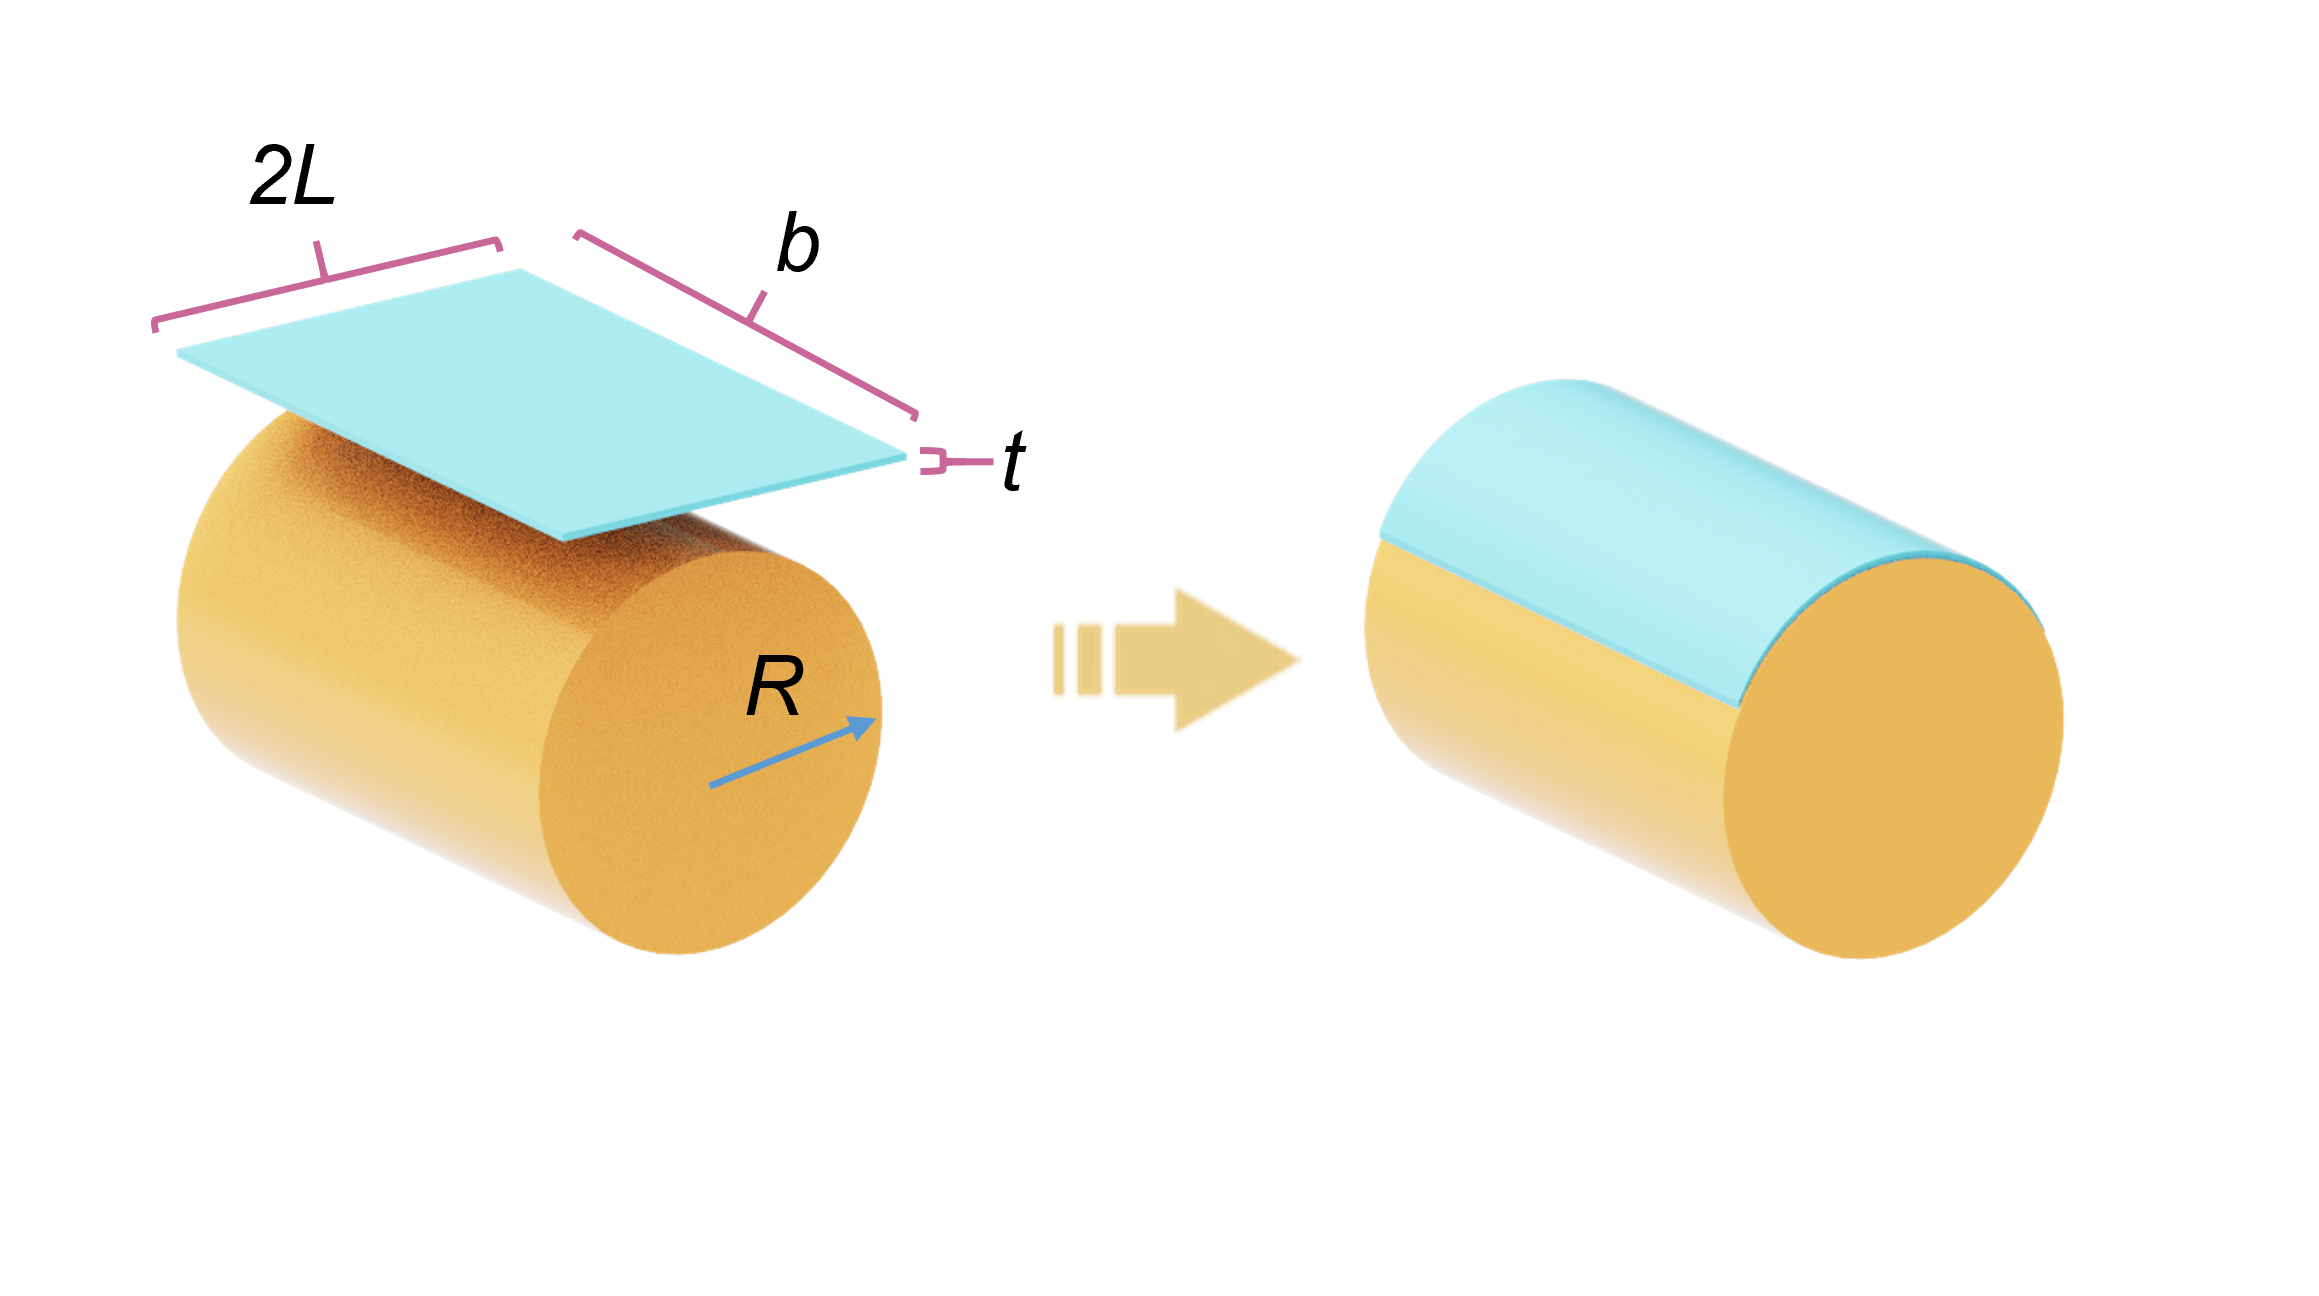
**

**Supplementary Fig. 33 |** Schematic illustration of a PPNF conformally wrapping around a cylindrical substrate.

**(2) spherical substrates**

For a circular PPNF with bending stiffness *D*, thickness *t* and radius *r* to conformally adhere to a spherical surface of radius *R*, the system must satisfy an overall energy balance. Specifically, the total elastic strain energy generated during deformation, comprising both bending energy and membrane strain energy, must be less than or equal to the total adhesion energy released upon conformal contact.

The total elastic strain energy of the system consists of the bending energy and the membrane strain energy :

(25)

When the PPNF is bent to a radius of curvature *R*, its bending energy depends on the bending stiffness *D* of the PPNF. For a PPNF of radius *r*, the total bending energy is:

(26)

Where equi-biaxial bending stiffness ，and is the plane-strain modulus of PPNF.

When the PPNF is conformally applied to a spherical surface, a geometry‑induced membrane strain arises. When a PPNF of radius *r* is adhered to a sphere of radius *R*, the curvature change at the center of the plate (*x=0*) is zero, but as the distance from the center increases, the azimuthal angle of that point relative to the sphere center increases. At a distance *x* from the center, the geometric strain in that direction depends directly on the local curvature and the coordinate *x*. Because the film is continuous, the deformation of each infinitesimal annular region (radius *x*, width *dx*) varies, and it is therefore necessary to integrate over the entire range [0, *r*] of the plate radius, introducing the tensile stiffness . The total membrane strain energy is:

(27)

The total energy of the wrapped state is the sum of the bending energy and the adhesion energy described above.

(28)

(29)

When the system is at the critical state of conformal contact,. At this point, the corresponding adhesion energy is the minimum critical adhesion energy :

(30)

**
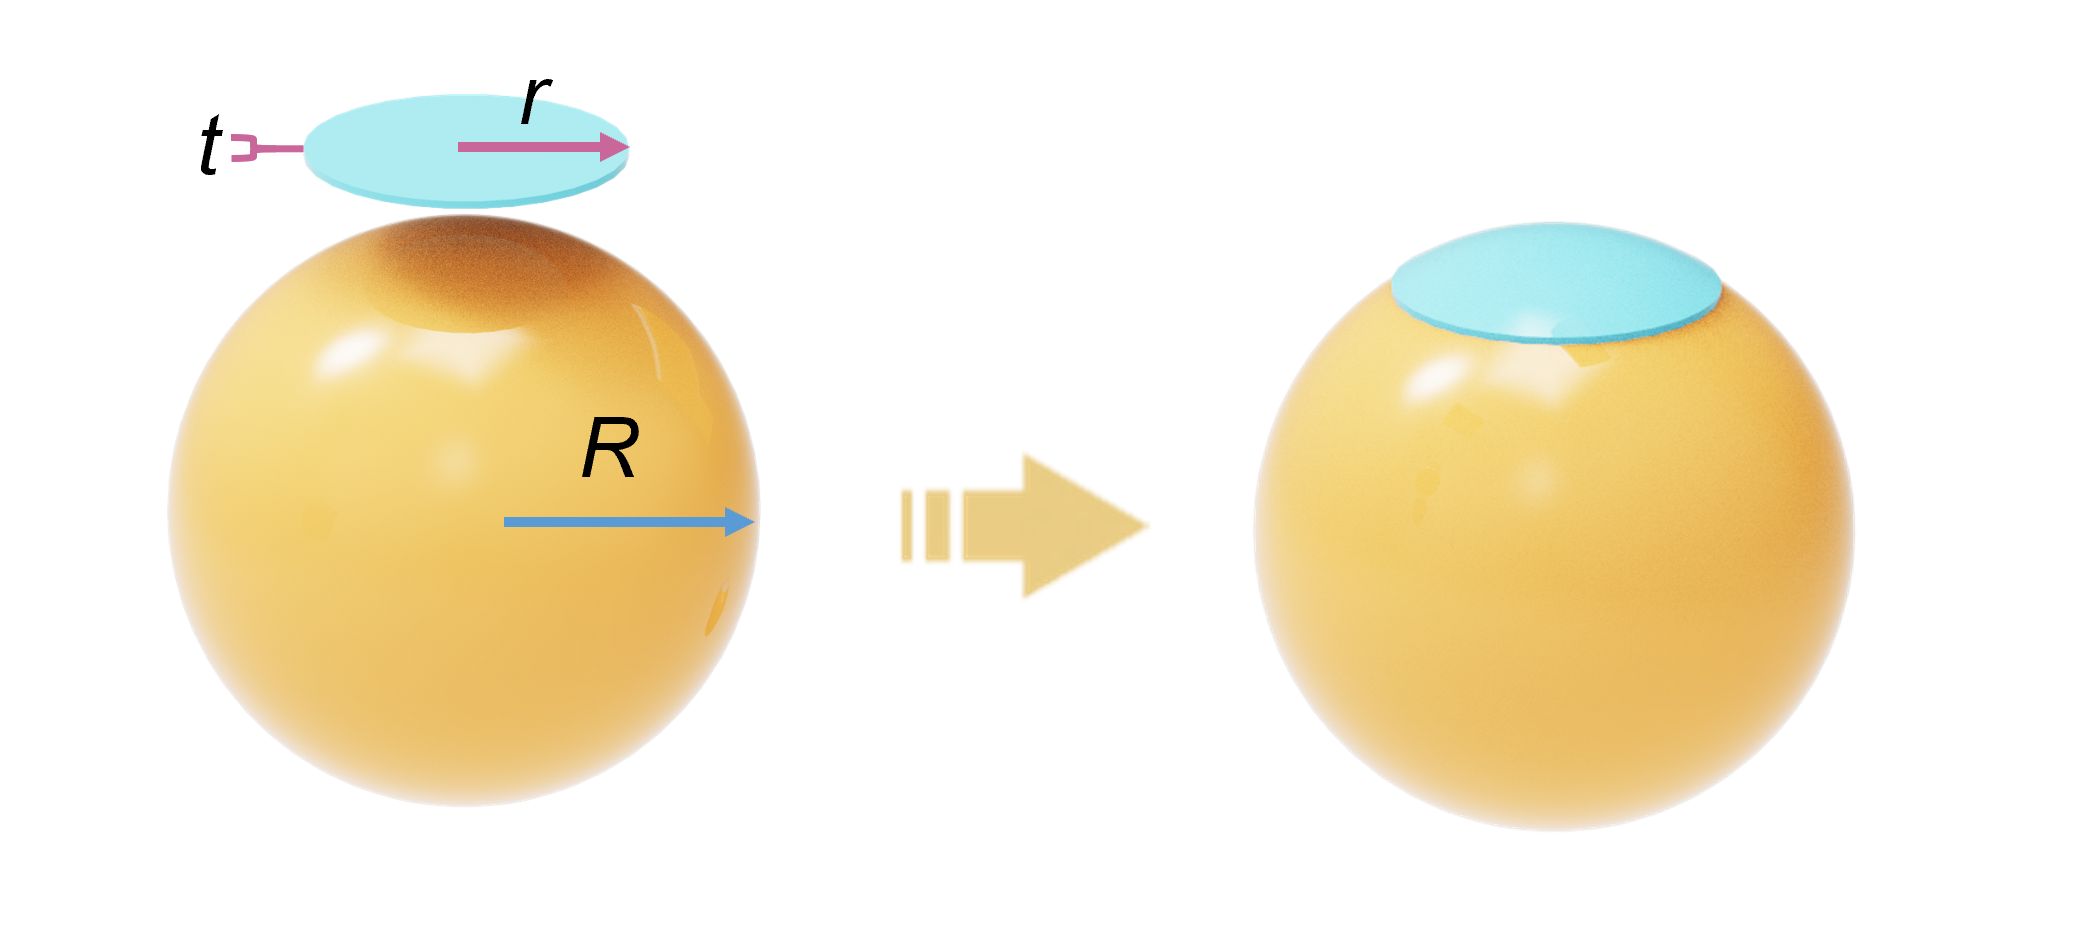
**

**Supplementary Fig. 34 |** Schematic illustration of a PPNF conformally wrapping around a spherical substrate.

**Supplementary Note 3**

**Calculation of encoding properties of PUFs**

1) Bit uniformity: The uniformity metric can be quantitatively evaluated by using the following equation:

Bit uniformity= (31)

where represents the th bit of a sample and represents the total number of bits in the sample.

2) Hamming distance (HD): Hamming distance quantifies the number of bit positions at which two binary codes differ. For two binary codes, denoted as *A* and *B*, HD is given by the following formula:

HD= (32)

where both and have a length of -bits, and and represent the th bit of and , respectively.

3) Uniqueness: The uniqueness of a batch of samples, defined as the average inter‑HD that measures the variations between different PUFs under the same challenge, can be quantified using the following equation:

Uniqueness= (33)

where and represent the th and th samples respectively, with each sample consisting of -bit. represents the total number of samples in this batch.

4) Repeatability: Repeatability corresponds to the average intra‑HD, which measures the differences between responses obtained from identical PUFs, and is calculated using the following equation:

Repeatability= (34)

where represents the total pixel number of each sample readout. represents the original -bit sample code and represents the readout of the same sample from another measurement, in which represents the number of measurements and represents the total number of measurements.

**Supplementary Note 4**

Qualitative scores of invisibility, conformality, adaptivity, multifunctionality, and biodegradability.

This work compares the current literature on polymer-based and biomass-based anti‑counterfeiting technologies based on five key criteria: invisibility, conformality, adaptivity, biodegradability and multifunctionality (Supplementary Table 1). Each criterion is scored on a scale from 1 to 5, with higher scores indicating superior performance of the label in that aspect.

Invisibility refers to the ability of an anti-counterfeiting label to remain undetectable under ambient white-light illumination. Labels that are completely imperceptible under white light and can only be visualized under specific stimuli (for example, UV excitation) were assigned a score of 5. Transparent or partially concealed labels were assigned a score of 3, whereas labels exhibiting visible coloration and obvious visual contrast under white light were assigned a score of 1.

**Conformality** describes the ability of a label to establish intimate contact with a substrate surface and was evaluated using bending stiffness as the quantitative metric. Lower bending stiffness indicates greater mechanical compliance and, consequently, higher conformability. Based on the bending stiffness value (*D*, N·m), conformality was scored as follows: 1 point for 10-3 ≤ *D* ≤ 100 N·m; 2 points for 10-4 ≤ *D* < 10-3 N·m; 3 points for 10-6 ≤ *D* < 10-4 N·m; 4 points for 10-7 ≤ *D* < 10-6 N·m; and 5 points for *D* < 10-7 N·m.

Adaptivity evaluates the capability of a label to maintain stable integration with dynamically growing biological tissues, including its ability to accommodate tissue deformation and growth while preserving mechanical integrity and functionality. Labels that fail to achieve imperceptible conformal integration or cannot be reliably applied to growing tissues were penalized by 4 points, corresponding to a score of 1 for this criterion.

Multifunctionality evaluates the presence of additional functions or properties of an anti-counterfeiting label beyond its primary anti-counterfeiting capability. The scoring is given by the following formula:

(35)

Where *S* is the score, *A* is the number of indicators implemented in the literature, and *B* is the number of indicators implemented in the current work.

**Biodegradability** refers to the capacity of the label to undergo environmentally or biologically relevant degradation. In this work, the PPNF exhibits excellent and programmable biodegradability in both physiological and soil environments, and therefore receives the maximum score of 5. Chitosan, although biodegradable both in vivo and in soil, was assigned a score of 4 owing to its comparatively limited degradation controllability. Cellulose, which is degradable in soil but exhibits limited in vivo degradability, received a score of 3. Poly(vinyl alcohol) (PVA) also received a score of 3 because, although partially degradable, its degradation efficiency and environmental adaptability are inferior to those of naturally derived biomaterials. Synthetic polymers with relatively slow degradation rates were assigned a score of 2, whereas materials that are effectively non-biodegradable received the minimum score of 1.

**Supplementary** **Movie Legends**

Movie 1. Drying process of a PPNF suspended on a hollow frame at room temperature.

Movie 2. Fabrication of a patterned PPNF label on a face mask.

Movie 3. The patterned PPNF retains stable conformal adhesion to the skin surface during alternating stretching and compression.

Movie 4. Fingerprint collection using PPNF.

Movie 5. Application of a patterned PPNF label onto calligraphy.

**Supplementary References**

1. Feng, N. et al. Preserving fruit freshness with amyloid-like protein coatings. *Nat. Commun.* **16**, 5060 (2025).

2. Yamagishi, K., Zhou, W., Ching, T., Huang, S.Y. & Hashimoto, M. Ultra‐Deformable and Tissue‐Adhesive Liquid Metal Antennas with High Wireless Powering Efficiency. *Adv. Mater.* **33**, 2008062 (2021).

3. Peng, F. et al. Color‐Tunable, Excitation‐Dependent, and Water Stimulus‐Responsive Room‐Temperature Phosphorescence Cellulose for Versatile Applications. *Adv. Mater.* **35**, 2304032 (2023).

4. Li, X. et al. Multi‐Modal Melt‐Processing of Birefringent Cellulosic Materials for Eco‐Friendly Anti‐Counterfeiting. *Adv. Mater.* **36**, 2407170 (2024).

5. Wang, J., Du, P., Hsu, Y.-I. & Uyama, H. Cellulose Luminescent Hydrogels Loaded with Stable Carbon Dots for Duplicable Information Encryption and Anti-counterfeiting. *ACS Sustainable Chem. Eng.* **11**, 10061-10073 (2023).

6. Kim, J. et al. A water-soluble label for food products prevents packaging waste and counterfeiting. *Nat. Food* **5**, 293-300 (2024).

7. Ye, W. et al. Respiration‐Responsive Colorful Room‐Temperature Phosphorescent Materials and Assembly‐Induced Phosphorescence Enhancement Strategies. *Small* **19**, 2207403 (2023).

8. Wang, T. et al. Versatile Room‐Temperature Phosphorescence Silk Fibroin Platforms for Sustainable and Biocompatible Multifunctional Interfaces. *Adv. Mater.* **38**, e12659 (2025).

9. Jiang, C. et al. All-protein-based rewritable and reprogrammable multifunctional optical imaging platforms via multi-strategy imprinting and multimode 3D morphing. *Matter* **7**, 1591-1611 (2024).

10. Leem, J.W. et al. Edible Matrix Code with Photogenic Silk Proteins. *ACS Cent. Sci.* **8**, 513-526 (2022).

11. Ji, Y.E. et al. All‐Biomass‐Based Hierarchical Photonic Crystals with Multimode Modulable Structural Colors and Morphing Properties for Optical Encryption. *Laser & Photonics Rev.* **18**, 2400621 (2024).

12. Xu, W.C. et al. Designing Rewritable Dual‐Mode Patterns using a Stretchable Photoresponsive Polymer via Orthogonal Photopatterning. *Adv. Mater.* **34**, 2202150 (2022).

13. Lee, Y.H. et al. Hierarchically manufactured chiral plasmonic nanostructures with gigantic chirality for polarized emission and information encryption. *Nat. Commun.* **14**, 7298 (2023).

14. Wang, C. et al. Poly(arylene piperidine) Quaternary Ammonium Salts Promoting Stable Long‐Lived Room‐Temperature Phosphorescence in Aqueous Environment. *Adv. Mater.* **34**, 2204415 (2022).

15. Yin, G. et al. Precisely Coordination‐Modulated Ultralong Organic Phosphorescence Enables Biomimetic Fluorescence‐Afterglow Dual‐Modal Information Encryption. *Adv. Funct. Mater.* **34**, 2310043 (2023).

16. Huang, H. et al. Firefly-inspired bipolar information indication system actuated by white light. *Nat. Commun.* **15**, 3999 (2024).

17. Wu, Y., Sun, R., Ren, J., Zhang, S. & Wu, S. Bioinspired Dynamic Camouflage in Programmable Thermochromic‐Patterned Photonic Films for Sophisticated Anti‐Counterfeiting. *Adv. Funct. Mater.* **33**, 2210047 (2022).

18. Zhu, C.N. et al. Dual‐Encryption in a Shape‐Memory Hydrogel with Tunable Fluorescence and Reconfigurable Architecture. *Adv. Mater.* **33**, 2102023 (2021).

19. Sun, Y. et al. Dual‐Mode Hydrogels with Structural and Fluorescent Colors toward Multistage Secure Information Encryption. *Adv. Mater.* **36**, 2401589 (2024).

20. Li, C. et al. Photoswitchable and Reversible Fluorescent Eutectogels for Conformal Information Encryption. *Angew. Chem., Int. Ed.* **62**, e202313971 (2023).

21. Zhu, C.N. et al. Single Chromophore-Based White-Light-Emitting Hydrogel with Tunable Fluorescence and Patternability. *ACS Appl. Mater. Interfaces* **10**, 39343-39352 (2018).

22. Liu, J. et al. Ionic Conductive Organohydrogels with Dynamic Pattern Behavior and Multi‐Environmental Stability. *Adv. Funct. Mater.* **31**, 2101464 (2021).

23. Chen, Q. et al. Long lifetimes white afterglow in slightly crosslinked polymer systems. *Nat. Commun.* **15**, 2947 (2024).

24. Feng, D. et al. Viscoelasticity‐Controlled Relaxation in Wrinkling Surface for Multistage Time‐Resolved Optical Information Encryption. *Adv. Mater.* **36**, 2314201 (2024).

25. Huang, H. et al. Butterfly‐Inspired Tri‐State Photonic Crystal Composite Film for Multilevel Information Encryption and Anti‐Counterfeiting. *Adv. Mater.* **35**, 2211117 (2023).

26. Liang, H. et al. Stimuli‐Responsive Recyclable Polymers with Room‐Temperature Ultralong Phosphorescence for Anti‐Counterfeiting. *Adv. Funct. Mater.* **36**, e13575 (2025).

27. Ye, W. et al. Spin and wavelength multiplexed nonlinear metasurface holography. *Nat. Commun.* **7**, 11930 (2016).

28. Park, K. et al. Plasmonic Nanowire‐Enhanced Upconversion Luminescence for Anticounterfeit Devices. *Adv. Funct. Mater.* **26**, 7836-7846 (2016).

29. Jin, Q. et al. Visually invisible multimode anti-counterfeiting based on highly transparent superamphiphobic/superhydrophilic pattern. *Nano Today* **61** (2025).

30. Sun, H., Maji, S., Chandrakasan, P. & Marelli, B. Integrating biopolymer design with physical unclonable functions for anticounterfeiting and product traceability in agriculture. *Sci. Adv.* **9**, eadf1978 (2023).

31. Leem, J.W. et al. Edible unclonable functions. *Nat. Commun.* **11**, 328 (2020).

32. Fan, Y. et al. Randomly Induced Phase Transformation in Silk Protein‐Based Microlaser Arrays for Anticounterfeiting. *Adv. Mater.* **33** (2021).

33. Wang, Z., Li, M., Fu, Y., Wang, Y. & Lu, Y. Robust and Versatile Biodegradable Unclonable Anti‐Counterfeiting Labels with Multi‐Mode Optical Encoding Using Protein‐Mediated Luminescent Calcite Signatures. *Adv. Mater.* **37**, 2409170 (2024).

34. Lin, X. et al. Physical Unclonable Functions with Hyperspectral Imaging System for Ultrafast Storage and Authentication Enabled by Random Structural Color Domains. *Adv. Sci.* **11**, 2401983 (2024).

35. Park, S.M., Park, G. & Yoon, D.K. Paintable Physical Unclonable Functions using DNA. *Adv. Mater.* **35**, 2302135 (2023).

36. Esidir, A. et al. Food-Grade Physically Unclonable Functions. *ACS Appl. Mater. Interfaces* **15**, 41373-41384 (2023).

37. Kim, Y. et al. Reconfigurable Multilevel Optical PUF by Spatiotemporally Programmed Crystallization of Supersaturated Solution. *Adv. Mater.* **35**, 2212294 (2023).

38. Minh, D.N. et al. Synthesis of MAPbBr3‐Polymer Composite Films by Photolysis of DMF: Toward Transparent and Flexible Optical Physical Unclonable Functions (PUFs) with Hierarchical Multilevel Complexity. *Adv. Mater.* **35**, 2208151 (2022).

39. Nocentini, S., Rührmair, U., Barni, M., Wiersma, D.S. & Riboli, F. All-optical multilevel physical unclonable functions. *Nat. Mater.* **23**, 369-376 (2024).

40. Jing, L. et al. Multigenerational Crumpling of 2D Materials for Anticounterfeiting Patterns with Deep Learning Authentication. *Matter* **3**, 2160-2180 (2020).

41. Kim, J.H. et al. Nanoscale physical unclonable function labels based on block copolymer self-assembly. *Nat. Electron.* **5**, 433-442 (2022).

42. Du, L. et al. Physical Unclonable Anti‐Counterfeiting “Watermarks” Via Swelling‐Induced Buckling‐Delamination in Polymer Bilayers for Portable and Robust Authentication. *Adv. Funct. Mater.* **36**, e15860 (2025).

43. Ma, T. et al. Dynamic wrinkling pattern exhibiting tunable fluorescence for anticounterfeiting applications. *Nat. Commun.* **11**, 1811 (2020).

44. Hu, Y.-W. et al. Time-dependent physical unclonable functions by long-lived triplet excitons in carbon dots. *Light: Science & Applications* **14** (2025).

45. Guo, H. et al. Multilevel Encoding Physically Unclonable Functions Based on The Multispecies Structure in Diamonds. *Adv. Funct. Mater.* **34**, 2304648 (2023).

46. Zhang, T. et al. Multimodal dynamic and unclonable anti-counterfeiting using robust diamond microparticles on heterogeneous substrate. *Nat. Commun.* **14**, 2507 (2023).

47. Gao, Y. et al. Fine Optimization of Colloidal Photonic Crystal Structural Color for Physically Unclonable Multiplex Encryption and Anti‐Counterfeiting. *Adv. Sci.* **11** (2024).

48. Sun, N. et al. Random fractal-enabled physical unclonable functions with dynamic AI authentication. *Nat. Commun.* **14**, 2185 (2023).

49. Zheng, Y. et al. Unclonable Plasmonic Security Labels Achieved by Shadow‐Mask‐Lithography‐Assisted Self‐Assembly. *Adv. Mater.* **28**, 2330-2336 (2016).

50. Gu, Y. et al. Gap-enhanced Raman tags for physically unclonable anticounterfeiting labels. *Nat. Commun.* **11**, 516 (2020).

51. Liu, Y. et al. Inkjet-printed unclonable quantum dot fluorescent anti-counterfeiting labels with artificial intelligence authentication. *Nat. Commun.* **10** (2019).

52. Ge, K. et al. Bio‐Inspired Structural Color Irises as Physical Unclonable Functions for Anti‐Counterfeiting. *Adv. Sci.* **12**, e04771 (2025).

53. Murataj, I. et al. Artificial fingerprints engraved through block-copolymers as nanoscale physical unclonable functions for authentication and identification. *Nat. Commun.* **15**, 10576 (2024).

54. Zhang, J. et al. An all-in-one nanoprinting approach for the synthesis of a nanofilm library for unclonable anti-counterfeiting applications. *Nat. Nanotechnol.* **18**, 1027-1035 (2023).

55. Park, G., Choi, Y.S., Kwon, S.J. & Yoon, D.K. Planar Spin Glass with Topologically Protected Mazes in the Liquid Crystal Targeting for Reconfigurable Micro Security Media. *Adv. Mater.* **35**, 2303077 (2023).

56. Martinez, P. et al. Laser Generation of Sub‐Micrometer Wrinkles in a Chalcogenide Glass Film as Physical Unclonable Functions. *Adv. Mater.* **32**, 2003032 (2020).

57. Wu, P. et al. Dynamic Structural Color Display Based on Femtosecond Laser Variable Polarization Processing. *Adv. Mater. Interfaces* **8**, 2100460 (2021).

58. Zhang, J. et al. Printed smart devices for anti-counterfeiting allowing precise identification with household equipment. *Nat. Commun.* **15**, 1040 (2024).

59. Kwak, J.K. et al. Exploiting Brownian Motion of Plasmonic Nanoparticles Using Optical Printing Approach for on‐Demand Physical Unclonable Functions. *Adv. Mater.* **37**, 2503976 (2025).

60. Wang, S. et al. Mechanics of Epidermal Electronics. *J. Appl. Mech.* **79**, 031022 (2012).

61. Kim, D.-H. et al. Dissolvable films of silk fibroin for ultrathin conformal bio-integrated electronics. *Nat. Mater.* **9**, 511-517 (2010).
